# Supplementary material for: Opportunities and challenges in antimicrobial resistance policy including animal production systems and humans across stakeholders in Argentina: a context and qualitative analysis
Source: PubMed Central journal article supplement — BMJ Open. 2024 Jun 17;14(6):e082156. doi: 10.1136/bmjopen-2023-082156 (PMC11191766; doi:10.1136/bmjopen-2023-082156), 2024-06-17
Supplement: bmjopen-2023-082156.draft_revisions.pdf [file bmjopen-2023-082156.draft_revisions.pdf]

# BMJ Open

BMJ Open is committed to open peer review. As part of this commitment we make the peer review history of every article we publish publicly available.

When an article is published we post the peer reviewers' comments and the authors' responses online. We also post the versions of the paper that were used during peer review. These are the versions that the peer review comments apply to.

The versions of the paper that follow are the versions that were submitted during the peer review process. They are not the versions of record or the final published versions. They should not be cited or distributed as the published version of this manuscript.

BMJ Open is an open access journal and the full, final, typeset and author-corrected version of record of the manuscript is available on our site with no access controls, subscription charges or pay-per-view fees (<http://bmjopen.bmj.com>).

If you have any questions on BMJ Open's open peer review process please email [info.bmjopen@bmj.com](mailto:info.bmjopen@bmj.com)

# BMJ Open

## Opportunities and challenges in antimicrobial resistance policy including animal production systems and humans across stakeholders in Argentina: a qualitative and context analysis

|                               |                                                                                                                                                                                                                                                                                                                                                                                                                                                                                                                                                                                                                                                                                                                                                                                                                                                                                          |
|-------------------------------|------------------------------------------------------------------------------------------------------------------------------------------------------------------------------------------------------------------------------------------------------------------------------------------------------------------------------------------------------------------------------------------------------------------------------------------------------------------------------------------------------------------------------------------------------------------------------------------------------------------------------------------------------------------------------------------------------------------------------------------------------------------------------------------------------------------------------------------------------------------------------------------|
| Journal:                      | <i>BMJ Open</i>                                                                                                                                                                                                                                                                                                                                                                                                                                                                                                                                                                                                                                                                                                                                                                                                                                                                          |
| Manuscript ID                 | bmjopen-2023-082156                                                                                                                                                                                                                                                                                                                                                                                                                                                                                                                                                                                                                                                                                                                                                                                                                                                                      |
| Article Type:                 | Original research                                                                                                                                                                                                                                                                                                                                                                                                                                                                                                                                                                                                                                                                                                                                                                                                                                                                        |
| Date Submitted by the Author: | 15-Nov-2023                                                                                                                                                                                                                                                                                                                                                                                                                                                                                                                                                                                                                                                                                                                                                                                                                                                                              |
| Complete List of Authors:     | <p>Allel, Kasim; London School of Hygiene &amp; Tropical Medicine; University of Exeter, Faculty of Health and Life Sciences</p> <p>Fernandez-Miyakawa, Mariano; Instituto Nacional de Tecnología Agropecuaria</p> <p>Gaze, William; University of Exeter, Faculty of Health and Life Sciences</p> <p>Petroni, Alejandro; Instituto Nacional de Enfermedades Infecciosas</p> <p>Corso, Alejandra; Instituto Nacional de Enfermedades Infecciosas</p> <p>Luna, Federico; Independent researcher</p> <p>Barcelona, Laura; Comisión Nacional de Control de la Resistencia Antimicrobiana</p> <p>Argentina, AMR policy research group; Full list of authors provided at the end of the manuscript upon acceptance</p> <p>Boden, Lisa; University of Edinburgh Royal Dick School of Veterinary Studies</p> <p>Pitchforth, Emma; University of Exeter, Faculty of Health and Life Sciences</p> |
| Keywords:                     | Public health < INFECTIOUS DISEASES, Health policy < HEALTH SERVICES ADMINISTRATION & MANAGEMENT, QUALITATIVE RESEARCH                                                                                                                                                                                                                                                                                                                                                                                                                                                                                                                                                                                                                                                                                                                                                                   |
|                               |                                                                                                                                                                                                                                                                                                                                                                                                                                                                                                                                                                                                                                                                                                                                                                                                                                                                                          |

SCHOLARONE™  
Manuscripts

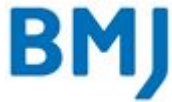

I, the Submitting Author has the right to grant and does grant on behalf of all authors of the Work (as defined in the below author licence), an exclusive licence and/or a non-exclusive licence for contributions from authors who are: i) UK Crown employees; ii) where BMJ has agreed a CC-BY licence shall apply, and/or iii) in accordance with the terms applicable for US Federal Government officers or employees acting as part of their official duties; on a worldwide, perpetual, irrevocable, royalty-free basis to BMJ Publishing Group Ltd ("BMJ") its licensees and where the relevant Journal is co-owned by BMJ to the co-owners of the Journal, to publish the Work in this journal and any other BMJ products and to exploit all rights, as set out in our [licence](#).

The Submitting Author accepts and understands that any supply made under these terms is made by BMJ to the Submitting Author unless you are acting as an employee on behalf of your employer or a postgraduate student of an affiliated institution which is paying any applicable article publishing charge ("APC") for Open Access articles. Where the Submitting Author wishes to make the Work available on an Open Access basis (and intends to pay the relevant APC), the terms of reuse of such Open Access shall be governed by a Creative Commons licence – details of these licences and which [Creative Commons](#) licence will apply to this Work are set out in our licence referred to above.

Other than as permitted in any relevant BMJ Author's Self Archiving Policies, I confirm this Work has not been accepted for publication elsewhere, is not being considered for publication elsewhere and does not duplicate material already published. I confirm all authors consent to publication of this Work and authorise the granting of this licence.

# Opportunities and challenges in antimicrobial resistance policy including animal production systems and humans across stakeholders in Argentina: a qualitative and context analysis

Kasim Allel<sup>1,2</sup>, Mariano Fernandez-Miyakawa<sup>3</sup>, William Gaze<sup>1</sup>, Alejandro Petroni<sup>4</sup>, Alejandra Corso<sup>4</sup>, Laura Barcelona<sup>6</sup>, Federico Luna<sup>7</sup>, AMR policy research group Argentina<sup>†</sup>, Lisa Boden<sup>5</sup>, Emma Pitchforth<sup>1,\*</sup>

<sup>1</sup> Faculty of Health and Life Sciences, University of Exeter, Exeter, UK

<sup>2</sup> Department of Disease Control, London School of Hygiene and Tropical Medicine, London, UK

<sup>3</sup> Instituto Nacional de Tecnología Agropecuaria Castelar, Buenos Aires, Argentina

<sup>4</sup> Servicio Antimicrobianos, Instituto Nacional de Enfermedades Infecciosas, ANLIS “Dr Carlos G. Malbrán”, Buenos Aires, Argentina.

<sup>5</sup> Royal School of Veterinary studies, University of Edinburgh, Edinburgh, UK

<sup>6</sup> Comisión Nacional de Control de la Resistencia Antimicrobiana, Buenos Aires, Argentina.

<sup>7</sup> Independent researcher, Buenos Aires, Argentina.

<sup>†</sup> Full list of authors provided at the end of the manuscript upon acceptance

\* Corresponding author: e.pitchforth@exeter.ac.uk. College of Medicine and Health, University of Exeter, Exeter EX1 2HZ, UK.

## ABSTRACT

**Introduction.** Gaps in antimicrobial resistance (AMR) surveillance and control, including implementation of national action plans (NAP), are evident internationally. Countries’ capacity to translate political commitment into action is crucial to cope with AMR at the human-animal-environment interface.

**Methods.** We employed a two-stage process to understand opportunities and challenges related to AMR surveillance and control at the human-animal interface in Argentina. First, we compiled the central AMR policies locally and mapped vital stakeholders around the NAP and the national commission against bacterial resistance. Second, we conducted qualitative interviews using a semi-structured questionnaire covering stakeholders’ understanding and progress towards AMR and NAP. We employed a mixed deductive-inductive approach and used the constant comparative analysis method. We created categories and themes to cluster sub-themes and determined crucial relationships among thematic groups.

**Results.** Crucial AMR policy developments have been made since 1969, including banning colistin in food-producing animals. In 2023, a new government decree prioritises AMR following the 2015 NAP launch. Our qualitative analyses identified six major themes for tackling AMR: (I) Cultural factors and socio-political country context hampering AMR progress, (II) Fragmented governance, (III) Antibiotic access, usage, and dispensing (IV) AMR knowledge and awareness throughout stakeholders, (V) AMR control and surveillance, (VI) NAP, and (VII) External drivers. We identified a fragmented structure of the food production chain, poor cross-coordination between stakeholders, limited surveillance and regulation among food-producing animals, and geographical disparities over access, diagnosis and treatment. The country is moving to integrate animal and food production into its surveillance system, with most hospitals experienced in monitoring AMR through antimicrobial stewardship programs.

**Conclusion.** AMR accountability should involve underpinning collaboration at different NAP implementation levels and providing adequate resources to safeguard long-term sustainability. Incorporating a multisectoral context-specific approach relying upon different One Health domains is crucial to strengthening local AMR surveillance.

**Keywords:** Antimicrobial resistance, antibiotic use, Argentina, one health, low-and-middle income countries

**What is already known on the topic?**

► Stronger administrative structures to ensure the sustainable transition of AMR strategies and identified NAP goals from policy to practice remain a major obstacle to progress, especially in low-and-middle income countries

**What this study adds?**

► Organisational barriers within stakeholder groups and the wider community—including the complexity of cross-sectoral communication, data access and interpreting information, fragmented routes for collaboration, and population awareness— have resulted in challenges towards establishing better AMR control and surveillance in Argentina

► AMR surveillance and control in food-producing animals outlines puzzled strings; there are limited antimicrobial stewardship programs and highly disintegrated food-production chains among meat production, specifically cattle.

► Potential beneficial opportunities presented, include using agricultural products (e.g., tannins) as an antibiotic replacement and the new law on AMR as an established government priority, should be fostered and capitalised for improvement towards AMR policy.

**How this study might affect research, practice, or policy?**

► Limited governance structures and system barriers, predominantly affected by political turn and contextual factors, play a central role in progressing towards AMR adaptation, mitigation, and preparedness.

► Effective jointly-designed strategies utilising a One-Health holistic approach to engaging the wider community, including a whole food-chain perspective, are essential to improve conversion to effective implementation of AMR policies

## 1 INTRODUCTION

2  
3 Antimicrobial resistance (AMR) represents a global public health threat driven by interrelated human, animal  
4 and environmental factors and requires multidisciplinary and cross-government action(1-3). National and  
5 international endeavours have collectively helped reduce AMR over recent years(4). The World Health  
6 Organisation (WHO) launched the Global Action Plan on AMR in 2015, soliciting countries to elaborate a  
7 National Action Plan (NAP) to confront AMR (5). Similar initiatives have come through the United Nations  
8 (UN)(6) and the European Commission (7) to develop multisectoral strategies involving human and animal  
9 health to fortify innovation stages and shape the global health agenda towards AMR NAPs. Despite 152  
10 countries having published NAPs(8), challenges exist in implementing NAPs locally, limiting the progress  
11 towards addressing AMR(9). Contrasting cultures, policies, incentives and behaviours of relevant sectors and  
12 stakeholders have made the implementation of NAPs an arduous process(4). For instance, the lack of  
13 surveillance and epidemiological data, the variety of methods used to collect data and the limited understanding  
14 of the clinical and social burden of AMR pose challenges for the consummation of NAPs internationally(10).  
15 Locally, policy design, including governance and stakeholder involvement and cross-sectoral coordination, are  
16 critical to fulfilling the NAP's objectives while adapting the alternating demands of each local subgroup(4, 11).

17  
18 Recent literature suggests that low- and middle-income countries (LMICs) are likely to face the most significant  
19 challenges in NAP implementation(4, 12-20). Among LMICs in Asia, a review found that accountability—a  
20 sense of ownership of organisations or people requiring responsibility to other stakeholders—has been omitted  
21 in most NAPs(4). Indications of unmet goals and lack of clarity in the stakeholders' role remain significant  
22 obstacles to AMR prevention and control (14, 15, 18). In the Americas, 29 countries (89%) have reported  
23 developing NAPs to combat AMR since the beginning of 2020 (21). However, most countries including  
24 Argentina, have not focussed sufficiently yet on One Health components; active surveillance of human health is  
25 not integrated with surveillance in animals or the environment(4, 18). Using a One Health approach is critical  
26 for effective NAP implementation because it optimizes the health of different sectors, including natural  
27 environments which play a crucial role in AMR evolution and transmission, while preventing zoonotic diseases  
28 and improving food safety and security. Argentina implemented a multisectoral NAP strategy in 2015(22), and  
29 progress has been made, including regulations prohibiting colistin usage in 2019 and antibiotics as growth  
30 promoters among livestock(23, 24). A recent study measuring global response to AMR by employing a  
31 governance framework on NAP contents highlighted that Argentina can make improvements in standards to  
32 control AMR (18). The study stated Argentina's moderate efforts towards monitoring and evaluating AMR in  
33 humans and animals and modest AMR policy design (i.e., lack of accountability). However, the study used the  
34 Tripartite Antimicrobial Resistance Country Self-Assessment (TrACSS) survey, which could be influenced by  
35 the exclusion of publicly and privately accessible documents relevant for AMR monitoring locally, and it lacked  
36 data sources that could invite heterogeneity (e.g., interviews with multiple experts/ stakeholders), all of which  
37 are considerably important in LMICs. A more direct way to explore Argentine's response to AMR policy is to  
38 obtain current data from the stakeholders involved.

39  
40 This study aims to better understand the stakeholder and regulatory landscape and the challenges and  
41 opportunities Argentina faces in implementing its NAP. We examined Argentina's case because it is one of the  
42 first countries to have a NAP and has a vast experience in AMR surveillance in the human sphere, which might  
43 indicate a good model for the Latin American region. We use the One Health (25) approach to assess policy  
44 priorities in action plans, and the governance framework (26) to evaluate interrelated dynamics between the One  
45 Health actors to improve critical areas: policy design, implementation tools, and monitoring and evaluation. The  
46 need to provide technical and financial support for implementing One-Health integrated NAPs has been  
47 recognised globally through the AMR Multi-Partner Trust Fund. Still, the donor base for this remains a few  
48 countries(27, 28). Global action may be based on shared goals, but there is a further need to understand the  
49 needs and priorities enabling or hindering those actions at national levels. We explore Argentina as a case-study  
50 to understand the complex landscape.

## 51 METHODS

### 52 Study aims and setting

53  
54 This article draws on literature and qualitative interview data from a study conducted in Argentina between  
55 September 2022 and February 2023. Argentina is an upper-middle income country that is endowed with highly  
56 fertile soils and great potential for renewable energy (hydroelectric, wind and solar energy)(29). It is a major  
57 food-producing country with an extensive agriculture and livestock industry; however, the country faces a high  
58 fiscal deficit with poverty and inflation rates of about 39% and 94.8% in 2022, respectively. The project's scope  
59 was to comprehend the context of AMR policy locally and among relevant stakeholders towards AMR control  
60

and surveillance, focusing on food-producing animals. Relevant stakeholders included government (those with political/administrative duties and those having scientific-technical functions), academic, international, NGOs, and private (chamber of producers, commercial laboratories and producers) institutions.

### Study design

We divided our study into two stages. First, we explored the legal framework within the AMR NAP scope and mapped vital organisations, particularly related to food-producing animals (i.e., cattle, chicken and pigs). We searched the literature, including government documents, academic articles, stakeholder's websites, and grey literature, to capture the most relevant AMR policies and critical actors and their role over time. Expert knowledge was consulted. Second, after identifying and mapping relevant stakeholders, we conducted qualitative semi-structured interviews between September 2022 and January 2023 to gather information on stakeholder's views and experiences of NAP implementation, the role of different organisations and nature of coordination and decision making between organisations. Interviews were held in person or online lasting 45 to 90 minutes and were conducted by a bi-lingual (English-Spanish) social scientist. The stakeholder mapping developed in stage 1 was used to inform recruitment. A range of participants were sought from government, private and academic organisations. Potential participants were sent a formal request letter via email inviting them to take part in the interview study. Semi-structured interviews were performed using an interview topic guide designed to explore five main items, with questions and objectives detailed below (Box 1). Stakeholders were encouraged to discuss their own views openly. After obtaining informed consent, interviews were audio-recorded in Spanish and transcribed and translated to produce English transcripts. Transcripts were checked for accuracy by the interviewer and anonymised. The consent form, participant information sheet, and participants interview topic guide are included in the online supplementary material.

#### Box 1. Interview's main sections including objectives, items and questions

**I. Participant's current role.** These questions seek to understand what experiences our participants have and how they might be relevant to implementing the NAP to combat AMR.

- <1> What your job/role is, and what tasks do you and your organisation mainly perform?
- <2> What are your (or department/organisation) interests and responsibilities concerning AMR?

**II. Understanding AMR among stakeholders.** This group of questions aim to understand employees' and organisations' views on AMR; its main drivers, change overtime, and priority areas within organisations to help tackle AMR.

- <1> How do you feel (or what are your personal and department's concerns) about antimicrobial resistance in humans? Does that differ from antimicrobial-resistance in animals or any other source, including the environment (how)?
- <2> Do you think the view about antimicrobial-resistance has changed over the years? How?
- <3> What are the priority areas within your organisation to increase AMR awareness and to comply with the NAP? Do you feel your organisation helps to contribute to any of the areas detailed in the national plan (how, which)?
- <4> What are the cornerstones for increasing AMR awareness while complying with the NAP within your organisation?
- <5> Which cornerstones do you feel are most relevant within your department (organisation)? Why?

**III. Information channels and flow within stakeholders/departments.** These questions attempt to improve organisations decision making towards better AMR surveillance by identifying how the information is channelled within and between organisations.

- <1>How do you feel about AMR-related information and communication flow within your organisation and among all stakeholders?
- <2> What do you think about communicational interactions, networking, and educational or getting-to-know instances between your organisation and other stakeholders and within departments of your organisation? Would you believe (and how) that the information pathways vary between specific organisation's fields/disciplines, public/private institutions, or certain other groups?
- <3> Could you identify which organisms (organisations), and how, are involved in your organisation's decision making and strategy towards improving AMR surveillance and control?

114 **IV. Challenges in the implementation of the national action plan.** These questions attempt to answer what  
 115 factors or challenges might be key to increasing AMR awareness and improving AMR surveillance in food-  
 116 producing animals and agriculture.

117 <1> Do you feel there is any challenge that your organisation faces in complying with the AMR NAP and  
 118 helping contribute to better animal AMR surveillance? (Political priorities, monetary and non-monetary  
 119 resources, communication, etc) What are the most important and what can be done to overcome these challenges  
 120 if your organisation could prioritise resources to contribute more to AMR surveillance in animals?

121 <2> Who else do you think has a critical role in helping with AMR surveillance in animals from the pool of  
 122 stakeholders?

123 **V. Future and other considerations.** These questions aim to understand future steps to be taken within the  
 124 industry and different key members to tackle AMR.

125 <1> How organisations might be helped to enhance cross-sectoral communication and teamwork? How can we  
 126 ensure organisations make progress and collaborate to meet NAP criteria?

127 <2> Which organisations, at the national and international levels, do you think are most important to talk to and  
 128 direct efforts to address AMR knowledge gaps? Does the list differ from that necessary to improve the NAP?

129 <3> Is there anything else important that you might want to share with us or that we are missing in the current  
 130 interview?

### 131 **Data analyses**

132 First, we systematically organised Argentina's main AMR regulations using a timeline frame and drew a map to  
 133 delineate the main stakeholders directly or indirectly supporting the National Commission for the Control of  
 134 Antimicrobial Resistance (CoNaCRA, "*Comisión Nacional de Control de la Resistencia Antimicrobiana*")  
 135 directed by the Coordination on Appropriate Use of Antimicrobials of the Ministry of Health, as the  
 136 commission articulating the efforts for the implementation of the NAP. Second, we employed a systematic  
 137 qualitative thematic analysis of the interviews using a mixed deductive-inductive approach(30); deductive  
 138 because it was guided by interview questions from a general topic to a more specific, but inductive as we draw  
 139 data-driven conclusions derived from bottom-up reasoning. We followed the constant comparative method(31)  
 140 to favour participants' comparability. Information and open data were classified into themes and subgroups  
 141 using a coding scheme. Two investigators independently recorded the interviews (KA, EP) using Dedoose  
 142 software (V.8.0.35, Los Angeles, California: Socio Cultural Research Consultants, LLC). Researchers frequently  
 143 met to reconcile differences in code application and distinguish new themes emerging from the data analyses.  
 144 After consolidating new themes, all interviews were re-coded using an updated scheme (see online  
 145 supplementary material). Subsequently, we identified interconnections between theme data to ascertain larger  
 146 categories into which themes were clustered. For quotations, we report descriptive characteristics, such as  
 147 organisation type (academia, government, private, production system), sex at birth, and assigned a random  
 148 number to each interviewee. Quotes are reported in the text and Tables as "Q" followed by ordered numbers.  
 149 We reported descriptive statistics to facilitate reader's understandability from whom quotations were drawn and  
 150 favour studies' transparency while maintaining the anonymity of participants. Whether themes presented  
 151 challenges or opportunities for AMR policy, we calculated the proportion of interviews mentioning each theme  
 152 as a challenge or opportunity. We showed these proportion calculations in six theme-specific squares coloured  
 153 accordingly to represent 100% of mentions split into challenges and opportunities. Our study analyses followed  
 154 the consolidated Criteria for Reporting Qualitative Research (COREQ)(32).  
 155

### 156 **Patient and public involvement**

157 Feedback on the study design and research questions employed was provided by members of public health  
 158 organisations based in Argentina and the UK.  
 159

## 160 **RESULTS**

### 161 **I. First stage: review of policies and mapping key stakeholders**

162 The timeline containing established laws and regulations related to AMR is found in Supplementary material  
 163 section I. Briefly, antimicrobial regulation started in the early 60's with the first law of medications and  
 164 enforced prescriptions for antibiotic acquisition. In 2007-9, new decrees were introduced instituting required  
 165 prescription for antibiotic sale and compliance for dispensation of medicines, including the registration book of  
 166 veterinary medicines usage in food-producing animals (2009-11, decree number 26514). In 2013, Argentina's  
 167



national Food Safety and Quality Service (SENASA) created the traceability system for veterinary medicines, which links sellers and purchasers where entities take full responsibility for antibiotic possession. Consecutively, Argentina's national commission for the control of AMR (CoNaCRA) was established and led the launch of the NAP in 2015 (see Supplementary material section II for a summary). This was concurrent with the abolition of antibiotic usage as an animal growth promoter (2015). The prohibition of colistin usage in any form/ingredient took place in 2019. Recently, there was a new law encompassing an One health AMR agenda in the future (decree number 27680) aiming to foster and promote AMR control, prevention, research, regulation, and awareness (24).

Finally, Figure 1 shows the mapping of key AMR surveillance and control stakeholders. We organised it starting from the CoNaCRA as the commission responsible for the implementation of the NAP and those relevant organisations surrounding them (main governmental divisions in brown boxes).

## II. Second stage: qualitative analyses

### Descriptive characteristics of study participants

We approached 27 individuals initially (non-response levels=33%), but our final sample consisted of 18 participants (six women, 33%) mostly based in Buenos Aires city (88%) and from diverse institutions including government (N=9), academia (N=3), private (N=2), NGOs (3) and international organisations (N=1).

### Thematic categories and codes

Barriers, opportunities, and state-of-art information contributing to human and food-producing animal AMR were clustered into seven thematic categories organised by specificity level (from less and more specific themes towards AMR policy). Themes were established based upon number of mentions and repetitiveness. Two themes emerged from countries embedded values and political context impacting AMR indirectly: (I) Cultural factors and country context and (II) Governance. Four themes were directly associated with AMR: (III) Antibiotics, (IV) AMR knowledge and awareness, (V) AMR control, (VI) National action plan. The remaining theme was linked to external factors indirectly affecting all chain's decision-making: (VII) External drivers. The full definition of themes —ordered from less (more coloured boxes) to more specific (less coloured boxes) except for external drivers, which affects them all— with their respective sub-themes, are shown in Table 1.

#### Theme I. Cultural factors and socio-political country context

This category involved country characteristics that determine the response to AMR by acknowledging and understanding communities' local context. Interviewees described that country's economic and political shifts, including goods shortages and high inflation rates, had jeopardised the health system, bringing instability over time to AMR control. Most political decisions in a resource-constrained country were said to be difficult to manage but high reliance upon people and relationships was essential. For instance, a participant described frustration and uncertainty but ability to cope with challenges despite the economic circumstances.

*“Argentina has 30 years of experience on AMR surveillance, we live economic shortages and political shifts fiercely in Argentina; a state of crisis, and we are somewhat used to this dynamic trying to cope with it as best we can. We have developed good coordinating links between teams centralised on good communication skills, but we cannot guarantee sustainability. It will depend on future leader's coordination since monetary resources are limited, a lot relies upon the projects or people's willingness to contribute but we believe it will perpetuate”*—Participant from a public institution (ID=9), female.

Most participants agreed that changing people's attitudes and behaviour, especially among food-producing animal producers, is challenging due to embedded values (Q1, Table 2).

#### Theme II. Governance

Participants reported constraints in the administration system that limited or enhanced their ability to perform improvements towards tackling AMR. Most participants recognised that SENASA conducts extensive and well-articulated labour; however, they emphasised the lack of auditing and accountability in decentralised administrations (regions) in Argentina, which hampers AMR control due to the inherent variability in the quality of care and health access (Q3, Table 2). Efforts to homogenise quality of care and access to antibiotics in humans and animals are ongoing, but monetary and non-monetary resources are bounded (Q4, Table 2). Although resources were finite, stakeholders' communication was often seen as a local strength and the cornerstone of policy making. Good interpersonal relationships within the public, academic, NGOs and international organisations were reported (Q5, Table 2). However, a demand for more integrated services and decision-making was stated (Q5), translating into the need to foster horizontal information flows with mutually integrated systems and organisations throughout the country (Q6, Table 2).

Regarding the regulation sub-theme, there are positive views towards the new law on antimicrobial use, despite the former law introducing some restrictions but lacking control on usage, prescribing and storage (most frequent among animals) (Q7, Table 2). On top of all previously discussed factors, the political context and

1  
2  
3 229 agenda were considered critical for AMR control but conflicting depending on the country's obstacles and  
4 230 people in charge (Q8, Table 2).  
5  
6  
7  
8  
9  
10  
11  
12  
13  
14  
15  
16  
17  
18  
19  
20  
21  
22  
23  
24  
25  
26  
27  
28  
29  
30  
31  
32  
33  
34  
35  
36  
37  
38  
39  
40  
41  
42  
43  
44  
45  
46  
47  
48  
49  
50  
51  
52  
53  
54  
55  
56  
57  
58  
59  
60

For peer review only

232 **Figure 1.** Stakeholders within the human and food-producing animal interfaces for the implementation of the NAP for the control of AMR in Argentina

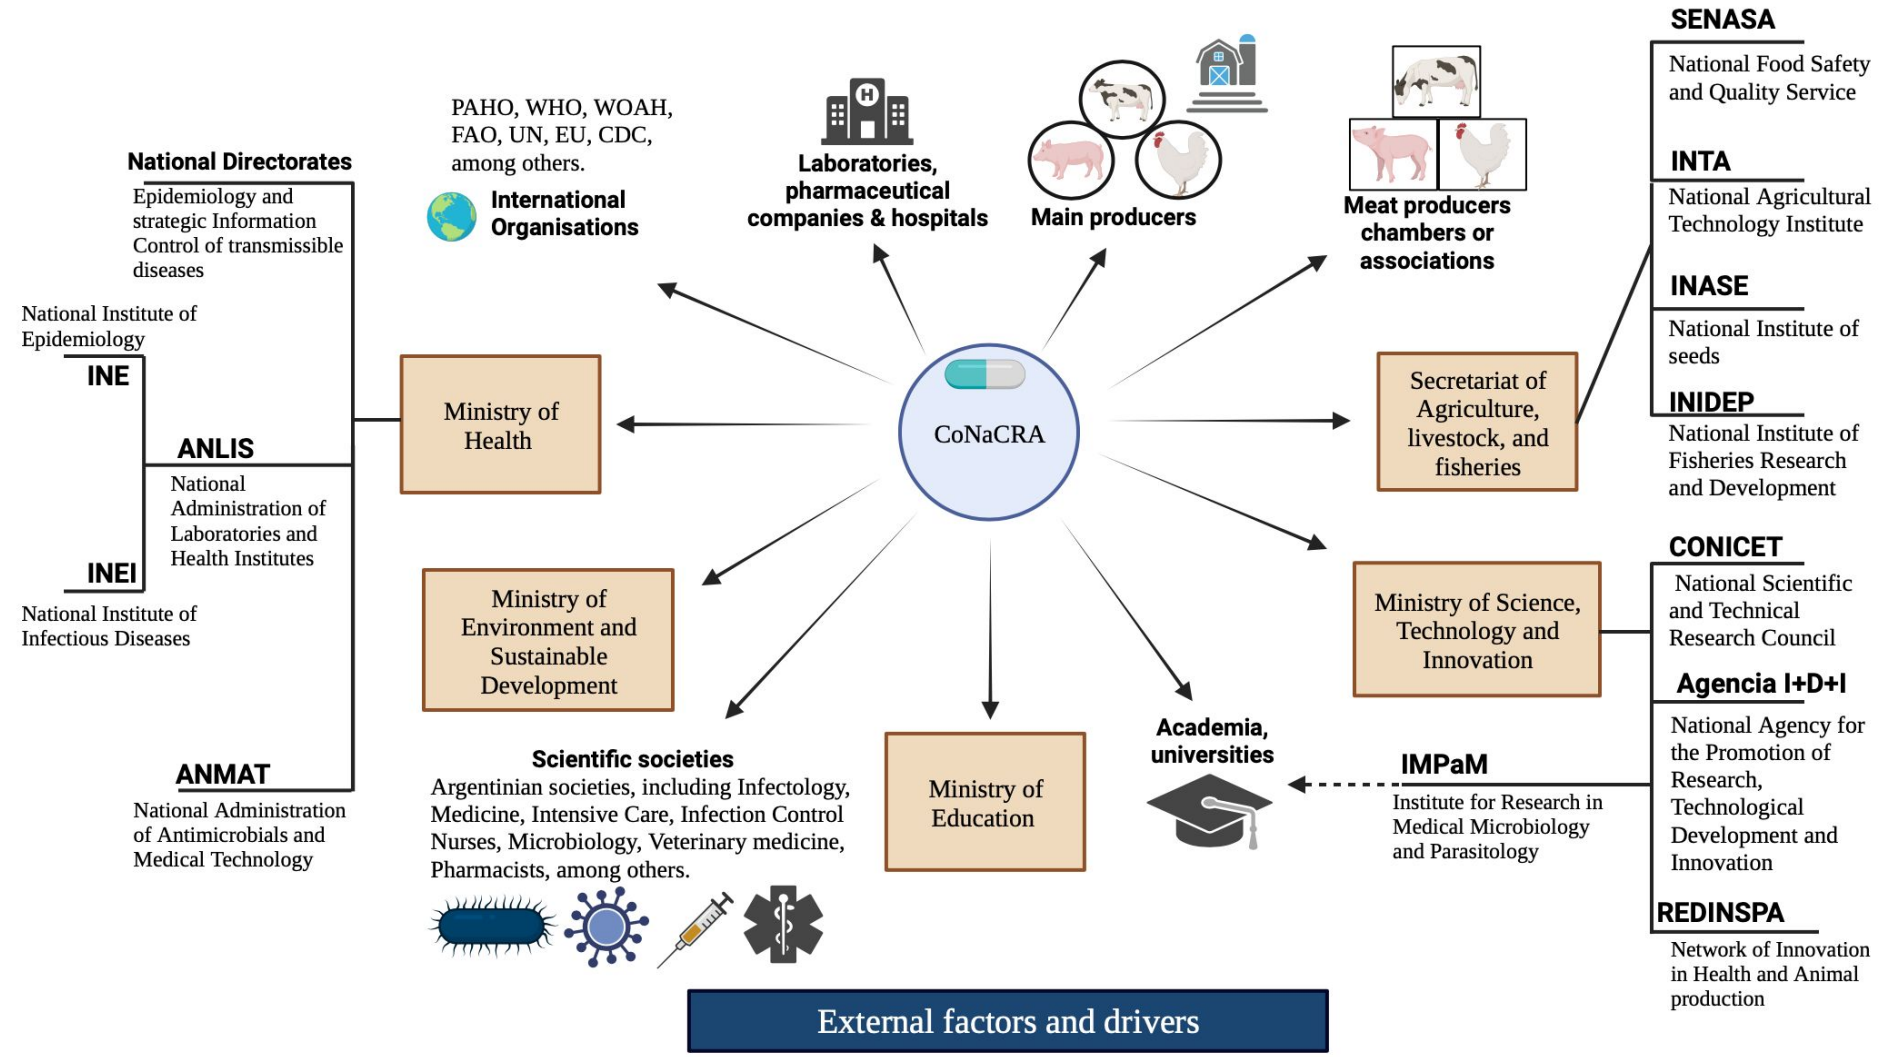

233  
 234 *Notes:* Organisations abbreviations are provided in the abbreviations subtitle. CoNaCRA= National Commission for the Control of Antimicrobial Resistance. All information on Government’s ministries and structures  
 235 is available in <https://www.argentina.gob.ar/organismos>.

236 **Table 1.** Main themes, definitions and sub-themes identified from the interview analysis (N=18 people)

| Themes <sup>†</sup>                                                                                                                                 | Definitions                                                                                                                                                                                                                                                                                  | Sub-Themes                                                                                                                                                                                                              | N of times mentioned*                                                                              |
|-----------------------------------------------------------------------------------------------------------------------------------------------------|----------------------------------------------------------------------------------------------------------------------------------------------------------------------------------------------------------------------------------------------------------------------------------------------|-------------------------------------------------------------------------------------------------------------------------------------------------------------------------------------------------------------------------|----------------------------------------------------------------------------------------------------|
| <b>I. Cultural factors and socio-political country context</b><br> | Understanding the importance of cultural, country context, including personal relationships                                                                                                                                                                                                  | <b>[1]</b> Cultural features<br><b>[2]</b> National context and sociodemographic characteristics                                                                                                                        | <b>[1]</b> 21<br><b>[2]</b> 18                                                                     |
| <b>II. Governance</b><br>                                          | Government attributes related to political priorities, federalisation, nature of institutions/groups, accountability, human and economic/budgetary resource available, data systems and capacity, importance of changing political will, regulations and communication between stakeholders. | <b>[1]</b> System governance<br><b>[2]</b> Resources<br><b>[3]</b> Stakeholder communication<br><b>[4]</b> Information and data flow<br><b>[5]</b> Regulation and compliance<br><b>[6]</b> Political context and agenda | <b>[1]</b> 23<br><b>[2]</b> 22<br><b>[3]</b> 39<br><b>[4]</b> 39<br><b>[5]</b> 38<br><b>[6]</b> 11 |
| <b>III. Antibiotics</b><br>                                        | Referring to antibiotic consumption and access, prescriptions control and alternatives being developed among animals and humans.                                                                                                                                                             | <b>[1]</b> Antibiotic access<br><b>[2]</b> Antibiotic consumption<br><b>[3]</b> Antibiotic regulations including prescriptions.<br><b>[4]</b> Alternatives to antibiotics                                               | <b>[1]</b> 15<br><b>[2]</b> 11<br><b>[3]</b> 14<br><b>[4]</b> 9                                    |
| <b>IV. AMR knowledge and awareness</b><br>                       | Related to public and professional awareness – the challenge of awareness and steps taken to address it including seminars, conferences, courses, stewardship programs, advertising campaigns using mass media, etc.                                                                         | <b>[1]</b> Challenges related to public and professional awareness.<br><b>[2]</b> Existing training and learning opportunities                                                                                          | <b>[1]</b> 41<br><b>[2]</b> 15                                                                     |
| <b>V. AMR control</b><br>                                        | Perceived progress and challenges, inclusive of AMR surveillance. Reference to food production markets including differences by animal species and the role of the veterinary sector on AMR control.                                                                                         | <b>[1]</b> AMR surveillance<br><b>[2]</b> Food production systems and specific surveillance<br><b>[3]</b> Veterinary sector, agent of change                                                                            | <b>[1]</b> 34<br><b>[2]</b> 35<br><b>[3]</b> 14                                                    |
| <b>VI. National action plan (NAP)</b><br>                        | Implementation of NAP and professional roles, including views on progress over time                                                                                                                                                                                                          | <b>[1]</b> NAP progress including challenges, barriers, and opportunities                                                                                                                                               | <b>[1]</b> 22                                                                                      |
| <b>VII. External drivers</b><br>                                 | Referring to external factors contributing to the acceleration of AMR, potential opportunities, and good practice, including international actors and role in/influence on national AMR                                                                                                      | <b>[1]</b> Context of COVID-19<br><b>[2]</b> International actors and policies                                                                                                                                          | <b>[1]</b> 16<br><b>[2]</b> 12                                                                     |

237 Notes: AMR= Antimicrobial resistance. <sup>†</sup>Themes are ordered from less to more specific levels (except for external drivers  
 238 which affects them all), see Figure SM2, Supplementary material, for visual hierarchy. \*Codes can be mentioned more than  
 239 once per interview.  
 240

241 **Table 2.** Quote examples by themes and sub-themes and identification of challenges and opportunities

| Themes <sup>†</sup>                                                                                                          | Sub-theme | Representative quote examples                                                                                                                                                                                                                                                                                                                                                                                                                                                                                                                                                                                                                    | Challenge/opportunity     |
|------------------------------------------------------------------------------------------------------------------------------|-----------|--------------------------------------------------------------------------------------------------------------------------------------------------------------------------------------------------------------------------------------------------------------------------------------------------------------------------------------------------------------------------------------------------------------------------------------------------------------------------------------------------------------------------------------------------------------------------------------------------------------------------------------------------|---------------------------|
| I. Cultural factors and country context<br> | [1]       | Q1: "AMR is a cross-cutting issue, but with older-generation low-educated producers living mostly in remote areas (a large quantity), it has been difficult to make them switch their mindset and understand that antibiotics are not necessary for food production, if no bacterial disease is present, and that antibiotic misuse and AMR affect humans and animal well-being."—Veterinary, public institution(ID=3), male.                                                                                                                                                                                                                    | Challenge                 |
|                                                                                                                              | [2]       | Q2: "Today, in Argentina, we have 52% poverty and talking about AMR is challenging, considering that 95% of the population is deprived. Telling people to buy cage- and antibiotic-free eggs for a double price seem problematic, considering that overcrowding, hunger, and lack of sewers are constant daily challenges"—Participant from an NGO (ID=13), male.                                                                                                                                                                                                                                                                                | Challenge                 |
| II. Governance<br>                          | [1]       | Q3: "SENASA is very dynamic but there is lack of accountability from each participating institution when combatting AMR. It is worrisome that SENASA's and other public organisation's labours are highly centralised in the capital, because there is a high heterogeneity in access to treatment, diagnosis, quality standards for animal products, and antibiotic prescribing throughout the country. We know SENASA, for instance, is impeccable but our surveillance system is not punitive, whereas it mostly teaches producers as we do not know where those AMR pathogens came from (reservoirs)"—Participant from an NGO (ID=12), male. | Challenge and opportunity |
|                                                                                                                              | [2]       | Q4: "I think that the most important difficulty is economic and human resources, because especially in public institutions, it is challenging for people to have exclusive and fully compensated dedication"—Participant from a public institution (ID=11), female.                                                                                                                                                                                                                                                                                                                                                                              | Challenge                 |
|                                                                                                                              | [3]       | Q5: "We have solid communication channels between governmental institutions (SENASA, INTA, MALBRAN, CoNaCRA) and somewhat with international and academic institutions, but we should employ a strategy of involvement between technical scientific groups, hospital and veterinary leaders, the private industry, including pharmaceutical, and meat producers and related organisations. We need to tell them what our problem is, for them to tell us theirs, and finally come up with integrative solutions that are beneficial for all parties."—Participant, from a public institution (ID=6), male.                                       | Challenge and opportunity |
|                                                                                                                              | [4]       | Q6: "For some diagnostics we report directly to the health informatics system, but we lack perhaps of articulating all the information flows more horizontally facilitating access above all the political decision-makers. Additionally, most systems are not integrated"—Participant from a public institution (ID=11), female.                                                                                                                                                                                                                                                                                                                | Challenge and opportunity |
|                                                                                                                              | [5]       | Q7: "Our legislation should regulate and control sales and consumption of antibiotics, including misuse (prohibition, e.g., colistin in veterinary in 2017). Now, it is approved the Antimicrobial Use Law, which legislates on the request of archived prescriptions, and it is stricter than the former law (only monitored required prescriptions and it had poor compliance). We believe antibiotic consumption might decrease. However, regulations are not yet standardised across country regions organically and the informal market is ample."—Participant from a public institution (ID=6), male.                                      | Challenge and opportunity |
|                                                                                                                              | [6]       | Q8: "At the ministerial level, sometimes AMR does not receive the importance and continuity it requires. Today we have a Minister of Health to whom AMR was a priority on their political agenda and most policy attempts entails, and do not omit, reducing AMR and antibiotic misuse. It is helpful to work in favour of that, but it is not frequently the case."—Participant from an international institution (ID=17), female.                                                                                                                                                                                                              | Challenge and opportunity |

### III. Antibiotics

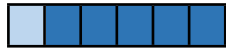

- [1] Q9: "Laboratories distribute veterinary products. Laboratories have the approval of SENASA to produce and commercialise the products, as well as the distributors. The commercialisation path is laboratory> distributor> production, through veterinarians, but sometimes is the owner himself selling and applying them due to lack of regulation on access, even over the counter. Among cattle, there is a large part of the production that is still extensive and pharmaceutical companies are often far away from feedlot farms. Hence, they keep first-aid kits, including antibiotics, which are applied to wounds or with no diagnostic or under no veterinary supervision. The law obliges establishments to have a treatment book where animal treatments and antibiotics used are recorded, but in most remote areas is not reliably fulfilled and control is limited" — Participant from an NGO linked to animals (ID=4), male. Challenge
- [2] Q10: "I work in swine production; our main concern relies upon prophylactic consumption of the antibiotic. Indiscriminate antibiotic consumption is present in two ways within swine production. First, metaphylactic, when there is a percentage of animals that are indeed sick within the flock, but since they are living with them, it is very likely that others are incubating the disease, hence they are treated. The second is the prophylactic, where there is no sick animal, but there are factors of potential stressors that could make those animals sick. This is our biggest concern, because antibiotic is then incorporated into food, whose biological matrix restricts bioavailability of the active ingredient. Additionally, when antibiotics are applied, withdrawal times are not monitored, which promotes the development of AMR mechanisms further" — Veterinarian, academia (ID=14), male. Challenge
- [3] Q11: "Laboratories producing medicines for veterinary use must comply with good manufacturing practice 'GMP' standards. They register the product, present all the documentation on waste, among other features. We have traceability in some products, such as ketamine, each bottle is identified and we follow-up until the final user. Laboratory production of medicines is well monitored, but there are limited regulations over usage registration, because products are not often administered by health professionals. For instance, final users do not necessarily respect the restriction period or animal treatment is incomplete, for which regulation is scarce." — Participant from an NGO (ID=4), male. Challenge
- [4] Q12: "We employ tannins, organic acids, probiotics, and prebiotics instead of antibiotics. We proved their efficacy for *Escherichia coli* and *Salmonella* using a mixture of probiotics and prebiotics in sentinel farms, which were boosted animal growth. We have produced alternative to antibiotics for a long-time including animal vaccines against pneumonia, and it was company's initiative." — Participant from a private company (ID=5), male. Opportunity

### IV. AMR knowledge and awareness

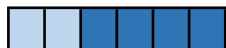

- [1] Q13: "One of the main challenges is the access to information/ communication, the awareness of responsible antibiotic use, and lack of commitment from the private sector. Technical and general education on antibiotics and AMR should be promoted to help set a change of consciousness in the consumer, prescriber, and sellers by letting them know the actual effects/impacts of AMR on population health and animal businesses (among producers). The profitability of the sector is compromised if producers are not willing to pay a differential for meat production that could produce higher costs in the future if not committed." — Engineer from an NGO (ID=7), male. Challenge
- [2] Q14: "The Argentine population is much more aware of what human health is and what antibiotics are designed for. For instance, we had the World Week of Awareness in November, and we held the AMR awareness race alongside the Ministry of Health and Sports, which exhibits interrelationships between different groups." — Participant from an international organisation (ID=17), female. Challenge and opportunity

### V. AMR control

- [1] Q15: "We created the infection surveillance program in 2004 for human

1  
2  
3  
4  
5  
6  
7  
8  
9  
10  
11  
12  
13  
14  
15  
16  
17  
18  
19  
20  
21  
22  
23  
24  
25  
26  
27  
28  
29  
30  
31  
32  
33  
34  
35  
36  
37  
38  
39  
40  
41  
42  
43  
44  
45  
46  
47  
48  
49  
50  
51  
52  
53  
54  
55  
56  
57  
58  
59  
60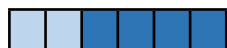

hospitals, which is an essential part of national surveillance reporting the annual prevalence/incidence of most critical pathogens. A ministerial resolution from 2018 recommends establishing hospital prevention and control programs, but adherence is optional. We have more than 200 added institutions reporting the appropriate use of antimicrobials yearly, including whether it was empirical, directed, surgical prophylaxis, community-acquired infection, etc. In-hospital software, part of the National Antimicrobial Resistance Surveillance Network 'WHONET', clinicians load the data, compute the analyses (automatically) and feeds the information to the epidemiology department. However, since 2021 (ministerial resolution), prevention and control programs must be certified depending on international guidelines. We use a federal criterion to enrol national institutions and federal hospitals, but private organisations are poorly represented. Also, some institutions did not have stewardship programs actively functioning. We updated the last referendum to include antimicrobial stewardship as a section for infection control (2021), assigning importance to protected areas for infectious disease specialist and pharmacists within hospitals." —Participant from a public institution (ID=11), female

Challenge

- [2] Q16 "We have two main problems. First, we detect and observe a lot of animal cases experiencing neonatal diarrhoea produced by multi-resistant *E. coli*, even encountering septicaemia, which presents a serious health problem. Secondly, we see multi-resistant bacterial strains more frequently associated with bovine's respiratory complex. We identify bronchopneumonia or pneumonia as the two main infectious syndromes. We receive multiple samples from animal lungs, mainly originated in fattening animals in the pen or outbreaks of pneumonia. Quite predominantly, we observe the presence of bacterial resistance to a large majority of the antibiotics routinely used for treating respiratory conditions. That shows some inefficiency from fragmented production systems lacking vertical structure, reduced biosecurity, and poor vaccination rates, especially among cattle."—Veterinarian, public organisation (ID=8), male.

Challenge

- [3] Q17: "I do believe that veterinarians have a very important multisectoral role to play there as training and awareness agents to contain AMR burden."— Participant from an NGO (ID=4), male.

Opportunity

## VI. National action plan (NAP)

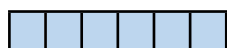

- [1] Q18: "Progress has been made if we compare it with five years ago. Regulations on the use of antibiotics to prevent their misuse, such as growth promoters, and vast existing (AMR control in animals) and new initiatives to start controlling AMR reservoirs in soil and water demonstrates we are working towards a better integrated system by taking into consideration the One Health approach"—Veterinarian, public organisation (ID=8), male.

Opportunity

## VII. External drivers

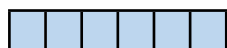

- [1]\* Q19: "Something the pandemic left us was the effectiveness of virtual meetings, for example, plan out objectives and do training with the veterinarians and farm owners" —Participant from an NGO (ID=4), male.
- [2] Q20: "We performed projects alongside the European Union, WHO and Centre for Disease Control, which supported Argentina through international funding to perform AMR surveillance and control, even in food products and wastewater." —Participant from a public institution (ID=1), female.

Opportunity

Opportunity

242 Notes: AMR= Antimicrobial resistance. † Themes coloured box indicates the extent to which codes present more challenges  
243 (darker, blue-coloured boxes placed primarily on right side) or opportunities (lighter, blue-coloured boxes placed primarily  
244 on left side). Sub-themes descriptions are found in Table 1. NGO= non-governmental organization. \*There are challenges  
245 associated as well, but we included an opportunity. CoNaCRA= National Commission for the Control of Antimicrobial  
246 Resistance. INE= National Institute of Epidemiology. INEI= National Institute of Infectious Diseases. INTA= National  
247 Agricultural Technology Institute. SENASA= National Service of Agri-food Health and Quality. WHO= World Health  
248 Organization.

249

### Theme III. Antibiotics

Thematic III encompasses efforts to improve antibiotic access, consumption, and regulation, while accounting for potential alternatives. Access to antibiotics was indicated as better regulated in the human side, where hospitals and labs work collaboratively; however, a few participants expressed concerns about the applicability of mandatory prescriptions for sales and a mismatch between prescribed treatments and antibiotic package dosing:

*“Antibiotics are still sold without a prescription either for human or animal use (more frequent among animals), even if prescriptions are mandatory by law, including keeping track of their usage by health professionals (electronic sales). Another issue is the dosage; antibiotics are usually sold in dosages greater than needed, which incentivises inappropriate utilisation maximising commercial interests.”*— Participant, academia (ID=14), female.

In addition, one participant expressed worrying views towards antibiotic access and prophylactic use in animals and its relationship with AMR evolution, including reduced capacity for monitoring usage and withdrawal (Q10, Table 2). On the animal side, the route for antibiotic acquisition could have been more cohesive; vets do not necessarily monitor antibiotic purchase, application, and storage, and limited local regulations are in place (Q9, Table 2). Such practices can be reflected early in the regulation system and antibiotic dispensing from the first stage of the purchasing chain. Most medicines for veterinary use were follow international manufacturing standards, but traceability of compounds and usage is restricted once purchase is made (Q11, Table 2). Finally, some participants working on antibiotic replacement produce alternatives for antibiotic use in food-producing animals. They were optimistic over vaccine production offering an efficacious alternative, tackling respiratory diseases in animals, and using additives and plant-based biomolecules to improve food conversion efficiency and eradicate antibiotic use as growth promoters in animal farms (Q12, Table 2).

### Theme IV. AMR knowledge and awareness

Theme IV incorporated progress made towards AMR knowledge and awareness targeting different settings and communities. Participants were inclined to say that awareness has increased, and impacts on human health are acknowledged (Q13, Table 2), primarily among leading institutions including government, but awareness campaigns only have limited reach to the wider population, including meat producers, as they tend to be specific and attend professional needs:

*“There is a problem with vets’ knowledge of antibiotics, specifically in terms of pharmacokinetic and pharmacodynamic aspects, the correct calculation of the dose administration. It is the duration of treatment in the form of clinical criteria and corresponding to specific physiological situations. All these aspects are related to rational antibiotic usage. If you forget these aspects, you can reach a therapeutic failure despite having chosen the correct antibiotic based on what the laboratory said; and this is largely prevalent in the country.”*— Veterinarian, academia (ID=14), male.

Notwithstanding, participants reported initiatives to raise human population’s awareness generally, including social events and educational seminars, having positive perceived conceptions from participants but their effectiveness remain unclear (Q14, Table 2).

### Theme V. AMR control

Theme V comprised all barriers or opportunities that made implementation of surveillance and AMR control overtime arduous or fruitful. Participants expressed that surveillance of AMR has exhibited a lot of progress overtime, especially among humans, and most recently in animals. Antibiotic stewardship and infection surveillance programs in humans, including the regular monitoring of a consolidated network of +200 hospitals, primarily public, are some of the positive views perceived by stakeholders towards implementation (Q15, Table 2). Antibiotic consumption control is a central priority of the government now and a countrywide program is being developed to strengthen AMR surveillance:

*“We have implemented a national surveillance system for the national consumption of antibiotics in humans, which we did not have until a short time ago. Now, it is time to access the information related to disaggregated statistics on antibiotic sales through collaboration with Pharmacology in human and animal side.”*—Pharmacist, public organisation (ID=6), female

However, policies around AMR surveillance and control are moving forward among livestock production systems but at slower rates. One participant indicated that testing for critical animal pathogens is routine and usually comes from public organisations. Still, animal diagnostics are difficult to access sometimes, and surveillance does not yet clearly account for different locations, species, and seasonal components:

*“INTA monitors some animal production chains, but surveillance is the primary task of SENASA, for example, in dairy, we evaluate animals experiencing a mastitis disease and track AMR and potential environmental reservoirs with technology developed locally. Another example, we detect Salmonella in animals and utilise microbiological analyses, including phenotyping and genotyping to analyse AMR and evolution, as part of surveillance routines hand by hand with SENASA. However, most surveillance comes from the governmental side, sampling seasonality is not often captured due to limited resources, the quantity of livestock farms is*



310 *massively distributed throughout the country, and local producer's veterinary diagnostics are often sent to*  
 311 *private labs where traceability is missing.*—Veterinarian, public organisation (ID=15), male.

312 Challenges identified by participants on AMR surveillance among animals are mirrored mainly in the animal  
 313 industry, which constitutes many producers and actors through the production chain, making it complex to  
 314 supervise (Figure 2 shows a brief description and example of cattle production based on interview content and  
 315 additional sources for broader context). As reported by one participant, industry's main challenges rely upon  
 316 controlling early stages within the production chain, including improved hygiene and sanitation and vaccination  
 317 strategies before animals are stressed while moving from breeding to fattening stages (Q16, Table 2).

318  
 319 **Figure 2.** Brief description of some features within the cattle industry in Argentina

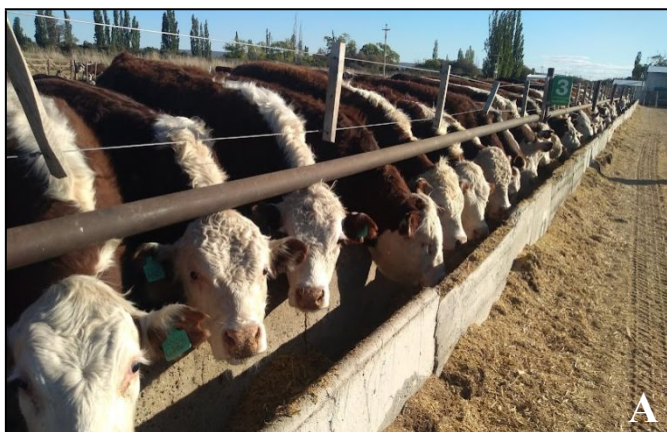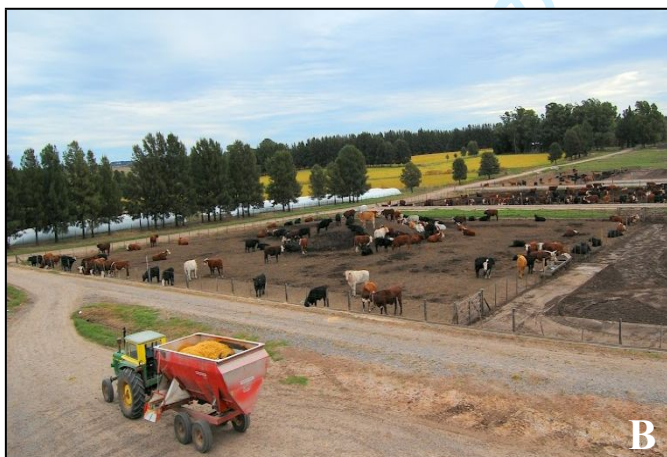

320 Around 52 million head of cattle are kept by livestock farmers  
 321 in Argentina. The country produced 3.2 million tonnes of beef  
 322 meat in 2020, of which 900,001 tonnes were exported (75% to  
 323 China). However, the production chain involves a wide  
 324 variety of actors and producers (from breeding, fattening,  
 325 slaughtering, preservation, and sale) and the number of direct  
 326 beef producers is estimated to be 230,000 with no significant  
 327 market share among specific companies, compared to chicken  
 328 or swine industries where three companies concentrate 70%  
 329 of the market share. Although swine and chicken are amongst  
 330 food-producing animals species with higher AMR rates for  
 331 streptomycin, ampicillin and tetracycline resistance, there is  
 332 still a research gap regarding beef-cattle from feedlots due to  
 333 reduced AMR monitoring and control, including antibiotic  
 334 usage. The cattle production chain is highly fragmented, and  
 335 the movement dynamics of the animals through the  
 336 production chain are complex, even though their transit must  
 337 be registered to comply with SENASA guidelines, and all  
 338 production units should be referenced in a computer database.  
 339 However, in practicality, controlling thousands of animals at  
 340 different production stages is challenging, and it is often hard  
 341 to trace and follow to check if producers follow guidance in  
 342 antibiotic use. In line with this, cattle vaccination rates against  
 343 diarrheal or respiratory diseases are relatively low compared  
 344 to the chicken and swine industry. Most livestock farms are  
 345 family businesses where there is a partial vet role for  
 346 antibiotic administration, and antibiotic storage in warehouses  
 347 is often observed due to reduced control on acquisition.

348 **C**

349 *Notes:*(A): Feed supplied in the trough for cattle, livestock farm, Buenos Aires, Argentina. (B): Cattle pens, livestock farm,  
 350 Buenos Aires, Argentina. (C): Characteristics of beef production and relationship with AMR control. AMR= Antimicrobial  
 351 resistance. NAP= National action plan. Most information was derived from our interviews; exact quotes are shown upon  
 352 request. References: (33, 34).

320  
 321 **Theme VI. National action plan**

322 All participants expressed a positive attitude towards progress made on the NAP even if it is slow. Participants  
 323 agreed upon improvements, such as, the institutionalisation of CoNaCRA, recently launched law on established  
 324 AMR network and surveillance (which does not depend on political will), new research centre (IMPAM) for  
 325 environmental surveillance of AMR reservoirs including water, more control over companion and food-  
 326 producing animals since 2015 from INTA and SENASA, and that prohibition of some antibiotics has been  
 327 crucial (Q18, Table 2).

328  
 329 **Theme VII. External drivers**

330 Theme VII comprises external factors, identified by participants, that have had a direct or indirect role affecting  
 331 AMR control and surveillance. Most participants (60%) recognised that COVID-19 limited the progress of AMR  
 332 control and policy due to reallocation of human, economic and other resources towards the pandemic response.  
 333 For instance, one participant described it as follows:

334 *“Teams were absolutely overwhelmed during COVID-19, all the artillery was dedicated to*  
 335 *diagnosis and containment of COVID. We observed an overuse of antimicrobials during these two*

336 *years, which has accelerated the appearance of new AMR mechanisms and their transmissibility.*  
 337 *At the microbiological level, pandemic lineages have appeared, which changes local*  
 338 *epidemiology”*—Infectious disease doctor, public organisation (ID=1), female.

339 However, positive lessons were drawn from the pandemic, including the effectiveness of virtual meetings as an  
 340 advantage of multisectoral collaboration (Q19, Table 2). Additionally, prioritisation of personal hygiene and  
 341 care and hand washing was understood to be improved due to increasing awareness of communicable diseases  
 342 and human health among citizens, as one participant reflected:

343 *“The pandemic has taught us, it's to prioritize our personal hygiene. Hand washing and personal*  
 344 *care help us not get sick from diseases, and if we don't get sick, we do not require antibiotics.”*—  
 345 Veterinary, public organisation (ID=3), male.

346 Finally, the second external factor relies upon international collaborations. Participants described solid  
 347 relationships with international actors within the Americas and abroad, which has helped fund local projects for  
 348 improving AMR control and surveillance (Q20, Table 2).

350 **DISCUSSION**

351  
 352 We employed a context and qualitative analysis to understand main gaps related to the progress of AMR control  
 353 in implementing AMR policy and regulation in Argentina. Our findings revealed that overall stakeholders’  
 354 perceptions towards AMR policy are positive, including development of personal relationships enabling  
 355 progress, and that the NAP along with current emerging legislation are essential in formalising the first steps to  
 356 a multisectoral and better integrated AMR surveillance system. Interviewees stated that main challenges on the  
 357 way forward are related, but not limited to, commitment and accountability, monetary and non-monetary  
 358 resources, cultural factors implying behaviour change, fragmented food-production systems, and global  
 359 governance. We have summarised these below in Figure 3 in relation to whether at macro or micro level and  
 360 short or long-term.

361  
 362 **Figure 3.** Major challenges and opportunities related to AMR policy in Argentina within a One Health scope in  
 363 the short and long-term  
 364

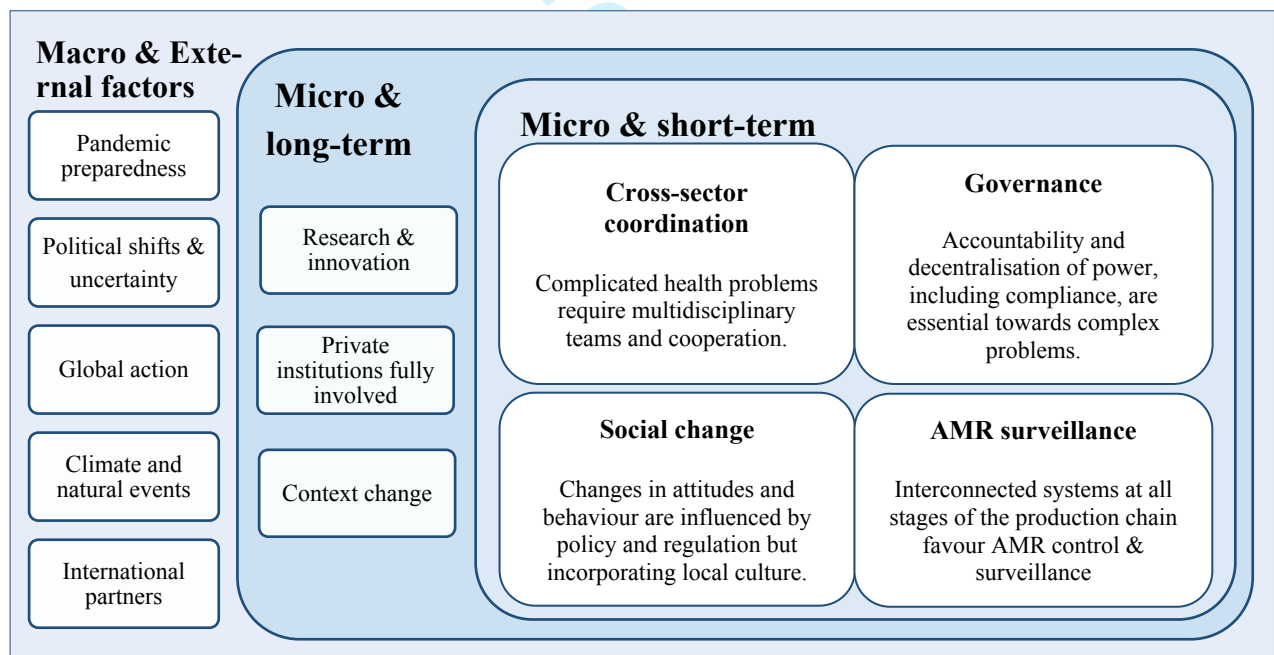

365  
 366  
 367 *Notes:* AMR= Antimicrobial resistance.

368  
 369 One of the most immediate short-term challenges identified by stakeholders was governance, which implied  
 370 needing more accountability and resources through different AMR actors. Clearer administration systems for  
 371 successful improvement and conveying AMR policies are crucial to moving forward in the AMR agenda(26,  
 372 35). Argentina’s administration system is divided into provinces. Still, political decisions are highly centralised  
 373 in the capital city, which hampers regulation of antibiotic access, AMR testing, and delivery of consistent access  
 374 to healthcare and hospital infrastructure in humans and animals. Although the CoNaCRA has province  
 375 representatives, the AMR agenda had limited alignment with subnational and local governments for NAP

1  
2  
3 376 implementation posing significant challenges in rural and remote areas(36). Likewise in Brazil (20), these areas  
4 377 are often highly exposed to AMR risks due to health deprivation. Re-administering monetary and non-monetary  
5 378 resources to meet local needs and capacities and empowering provincial sentinel organisations are crucial to  
6 379 making AMR policies accountable.

7 380  
8 381 Cross-sector coordination including animal, environmental and human sectors was highlighted as crucial by  
9 382 interviewees and constituted an essential element of short-term action towards tackling AMR and improve  
10 383 policy design. Although communication was perceived as positive due to interpersonal relations between  
11 384 colleagues, adequate governance must be established, including mechanisms to link organisations across sectors  
12 385 through formal channels to foster continuity. Literature has focused on countries' need for better engagement  
13 386 and advocacy from various stakeholders (9, 14, 37). Governments, policymakers, and NGOs are essential to  
14 387 AMR control, supported by budgetary commitment and political authority to meet objectives(19). Current  
15 388 interventions in Argentina remain sector-specific, which could be attributed to differences in priorities for AMR  
16 389 or insufficiently well-defined roles in the NAP. Developing a monitoring or evaluation system for all  
17 390 implementation plans is recommended to determine policy effectiveness. Broad cross-field participation is also  
18 391 crucial if no public budget is allocated to address AMR nationally. Insufficient funding provided by the annual  
19 392 national budgets negatively impacts NAP implementation, generating more constraints on AMR action. The  
20 393 COVID-19 pandemic garnered global attention disrupting national resources and health services that were  
21 394 indirectly assigned to AMR control, and reallocating those funds has posed challenges to AMR reduction  
22 395 measures. One Health although theoretically a useful framework, was not considered in NAP implementation—  
23 396 it could have accounted for the co-benefits of addressing both risks concurrently. That is why the United  
24 397 Nations Environment Program (UNEP) established the Multi-partner Trust Fund (MPTF) to help LMICs  
25 398 improve delivery of multisectoral NAPs (28)..

26 399  
27 400 AMR awareness has increased overtime in Argentina. Recent efforts have included various seminars and  
28 401 activities, including a long-distance foot race to spread the word on AMR(38). However, AMR comprises  
29 402 stakeholders with diverse comprehension of the AMR phenomenon, and we evidenced a mismatch between  
30 403 scientific and non-scientific domains, including general public. Social change promoting human health via shifts  
31 404 in society's behaviour should be prioritised to ensure the sustainability of human development and their  
32 405 environments (39). For instance, public engagement is overlooked in Argentina's NAP. Strategies to evaluate  
33 406 attitudes, behaviours, necessities, and practices of socioeconomically and culturally diverging communities,  
34 407 drawing particular attention to those most vulnerable to AMR infections, are crucial to design public health  
35 408 interventions to combat AMR (4).

36 409  
37 410 Strengthening AMR surveillance and control is vital, with different challenges depending on the species  
38 411 spectrum, as highlighted previously in LMICs(4, 19, 20, 40-42). In humans, laboratory surveillance has been  
39 412 based for decades on the connectivity of a well-established hospital networks (e.g., WHONET-Argentina(43)),  
40 413 which has helped monitor AMR locally with institutionalised IPC policies, led by the Antimicrobial Agents  
41 414 Division of INEI-ANLIS, the National and Regional Reference Laboratory for AMR, and the National Hospital  
42 415 Infection Surveillance Program (VIDHA), respectively. However, there are still gaps regarding the effectiveness  
43 416 of preserving antibiotics through stewardship programs, although consumption levels and inappropriate usage  
44 417 rates decreased before COVID-19(44). Yet, quality control among stewardship programs, antimicrobial sales  
45 418 with necessary prescriptions, and targeted local efforts in differing regions are still challenging throughout the  
46 419 country(45). In animals, the main surveillance challenges that were reported were concentrated around the  
47 420 unification of production systems (dispersed via multiple chains and actors potentially favouring the  
48 421 dissemination of AMR), whose current fragmented status hampers regulation, with differing control levels  
49 422 depending upon animal species. Systems' capacity to ensure prescription and consumption data is compromised  
50 423 and policies should coordinate and harmonise AMR surveillance while regulating the usage of antimicrobials in  
51 424 animal production at all production stages(34). Globally, antimicrobial stewardship by farm owners and health  
52 425 professionals (e.g., veterinarians) is relatively weak within agricultural systems; developing efforts towards  
53 426 stewardship programs in veterinary services, bolstering the veterinary role as a critical change agent, and  
54 427 companion animal practice remains crucial (46-48). Argentina's chambers of producers play an active role in  
55 428 agglomerating food producers and understanding their needs (e.g., Camara Argentina de Feedlots); their job  
56 429 should be directed towards better integration and prioritisation of educational services and improved production  
57 430 standards.

58 431  
59 432 A recent WHO report on integrated surveillance of AMR in foodborne diseases indicated that ineffective public  
60 433 health AMR surveillance systems often lack broader regulation and laboratory infrastructure, limited  
434 biosecurity, and inadequate data management capacity at government levels(49). We observed reduced capacity  
435 for data monitoring and sharing among animal stakeholders, whereby surveillance of antibiotic sales/usage and

1  
2  
3 436 AMR rates by animal species could be better reported. Despite limited public control due to fragmentation of  
4 437 the production chain, food producers are perceived to prioritise profitability and local needs, regardless of the  
5 438 effects of AMR on population health. Moreover, creating an integrated One-Health approach combining animal  
6 439 and human systems, including environmental sources, might help reduce the AMR burden and prevent animal  
7 440 infections in farming communities(25, 50), ensuring sustainability over time and lowering the risks associated  
8 441 with political shifts and global uncertainties. The role of the private sector, not only restricted to food producers,  
9 442 in supporting AMR surveillance should be encouraged to provide a holistic whole-system integration, including  
10 443 a whole food-chain approach(51, 52). This should involve data access and optimising contemporary treatments  
11 444 and diagnostics through more research and technology to elucidate the transmission pathways of the most  
12 445 critical microorganisms for animal and human health.  
13 446

14 447 We identified potential opportunities that could help contribute to progressing action to reduce AMR locally.  
15 448 Most stakeholders favoured agricultural non-antimicrobial drug products as an antibiotic replacement for animal  
16 449 growth promoters. Using tannins and natural plant-based medicines could supersede antibiotics, reducing  
17 450 selective pressure and AMR burden(53, 54). Nevertheless, most of these products are difficult to access locally  
18 451 with limited legislation and high reliance on a few international companies. The provision of replacement routes  
19 452 from the government for antibiotic-free additives usage in animals, including appropriate stakeholder education  
20 453 and countrywide support through public pharmacies, is something the authorities should leverage. Furthermore,  
21 454 the new law establishing the AMR agenda as a constituted program, regardless of political change, presents  
22 455 substantial progress towards national recognition of the AMR problem(24). The initiative brings a long-term  
23 456 perspective to AMR policy, which could be used for the creation of an AMR policy database containing  
24 457 information on NAP implementation accountability and cross-species and environment AMR surveillance for  
25 458 policy advisors.  
26 459

27 460 Our study has some shortcomings. First, we were not able to speak to stakeholders from all areas of the  
28 461 stakeholder mapping and cannot generalise the views of participants to others but have confidence in the  
29 462 transferability of findings and common themes that arose among the diverse stakeholders who participated.  
30 463 Nevertheless, common themes arose from speaking to a range of stakeholders and our sample reached saturation  
31 464 with a narrow range of interviews, considered an appropriate sample size for qualitative research (55). Second,  
32 465 we could not represent private hospitals for human AMR, and differences between production chains, including  
33 466 a broader scope of animal species, dairy products, and final animal product providers, which remains a future  
34 467 study. Third, the extent of interviewees' actual involvement in AMR policies differed; however, we ensured  
35 468 respondents best authority through collaborative local work and expert knowledge. Fourth, the authorship group  
36 469 includes people involved in AMR policy in Argentina which could either favour (facilitate information flow) or  
37 470 bias (sampling, selection and confounding) our study results.  
38 471

39 472 Finally, participants' beliefs (interviews held between December 2022 and January 2023) might be subject to  
40 473 change in the forthcoming years due to implementation of the newly introduced national law on AMR  
41 474 prevention and control (August 2022)(24). Tighter measures regarding antibiotic usage and sales (only under-  
42 475 filled prescriptions) and promoting the One Health approach via implementing cross-sector policies while  
43 476 accounting for organisation-specific responsibilities for their listed tasks are examples of the expected outcomes  
44 477 the law might enforce.  
45 478

## 46 479 CONCLUSION

47 480  
48 481 Our study results draw attention to the main strengths, opportunities, and challenges in the process towards  
49 482 improved AMR awareness, control, and surveillance across the human-animal frontier in Argentina. The  
50 483 country has been one of the leaders in the region with an established AMR surveillance network for human  
51 484 health in the latest 40 years. However, AMR governance requires a multidisciplinary focus to help stakeholders  
52 485 at all levels deal with knowledge uncertainties and resulting differences in framing the AMR problem. We found  
53 486 critical areas that should be strengthened, including accountability, sustainable engagement, integrity and equity,  
54 487 socio-behavioural change, international cooperation, and consolidation of environmental and animal  
55 488 departments. Cross-cutting interventions incorporating these areas through different One Health domains should  
56 489 be accounted for if progressing towards AMR is noted. The recent law on AMR prevention and control serves as  
57 490 a good example, which identifies potential pathways to overcome challenges with direct implications for LMICs  
58 491 in the Latin American region.  
59 492

60 493 **Funding:** This research is co-funded by the UK Department of Health and Social Care as part of the Global  
61 494 AMR Innovation Fund (GAMRIF)(BB/T004452/1). This is a UK aid programme that supports early-stage  
62 495 innovative research in underfunded areas of antimicrobial resistance (AMR) research and development for the

496 benefit of those in low- and middle-income countries (LMICs), who bear the greatest burden of AMR. The  
 497 views expressed in this publication are those of the author(s) and not necessarily those of the UK Department of  
 498 Health and Social Care.

500 **Role of the funding sources:** The funders had no role in the design, conduct, analysis or interpretation of the  
 501 study.

503 **Acknowledgments:** All authors attest they meet the ICMJE criteria for authorship and have reviewed and  
 504 approved the final article. The authors are grateful to all participants for volunteering time as part of interviews  
 505 and workshops.

507 **Conflicts of Interest:** The authors declare no conflict of interests.

509 **Author Contributions:** Conceptualization (KA, EP, WG, MF-M, AP); methodology (KA, EP, LB); formal  
 510 analysis (KA); writing—original draft preparation (KA); writing—review, editing and commenting (KA, EP,  
 511 WG, MG-M, AP, LB); supervision (EP, M F-M, AP). All authors have read and approved the final version of  
 512 the manuscript.

514 **Data availability:** The qualitative data underlying this article are available in the article.

516 **Ethics review:** Ethical approval was obtained from the Human Ethical Review Committee at University of  
 517 Edinburgh (Ref: HERC\_696\_21).

#### 519 Abbreviations

520 AMR= Antimicrobial resistance  
 521 SENASA= Argentina's National Food Safety and Quality Service  
 522 ANLIS= Argentina's National Administration of Laboratories and Institutes of Health  
 523 CoNaCRA= Argentina's National Commission for the Control of Antimicrobial Resistance  
 524 INTA= Argentina's National Agricultural Technology Institute  
 525 IMPaM= Argentina's Institute for Research in Medical Microbiology and Parasitology  
 526 UBA= Universidad de Buenos Aires  
 527 INE= Argentina's National Institute of Epidemiology  
 528 INEI= Argentina's National Institute of Infectious Diseases  
 529 ANMAT= Argentina's National Administration of Drugs, Food and Medical Devices  
 530 CONICET= Argentina's National Scientific and Technical Research Council  
 531 FAO= Food and Agriculture Organization  
 532 WOA= World Organization of Animal Health  
 533 WHO= World Health Organization  
 534 PAHO= Pan American Health Organization  
 535 NAP= National Action Plan

#### 537 REFERENCES

- 539 1. Holmes AH, Moore LS, Sundsfjord A, Steinbakk M, Regmi S, Karkey A, et al. Understanding the  
 540 mechanisms and drivers of antimicrobial resistance. *The Lancet*. 2016;387(10014):176-87.
- 541 2. Murray CJ, Ikuta KS, Sharara F, Swetschinski L, Aguilar GR, Gray A, et al. Global burden of bacterial  
 542 antimicrobial resistance in 2019: a systematic analysis. *The Lancet*. 2022.
- 543 3. Allel K, Day L, Hamilton A, Lin L, Furuya-Kanamori L, Moore CE, et al. Global antimicrobial-  
 544 resistance drivers: an ecological country-level study at the human–animal interface. *The Lancet Planetary*  
 545 *Health*. 2023;7(4):e291-e303.
- 546 4. Charani E, Mendelson M, Pallett SJ, Ahmad R, Mpundu M, Mbamalu O, et al. An analysis of existing  
 547 national action plans for antimicrobial resistance—gaps and opportunities in strategies optimising antibiotic use  
 548 in human populations. *The Lancet Global Health*. 2023;11(3):e466-e74.
- 549 5. Mendelson M, Matsoso MP. The World Health Organization global action plan for antimicrobial  
 550 resistance. *SAMJ: South African Medical Journal*. 2015;105(5):325-.
- 551 6. Humphreys G, Fleck F. United Nations meeting on antimicrobial resistance. *World Health*  
 552 *Organization Bulletin of the World Health Organization*. 2016;94(9):638.

- 1  
2  
3 553 7. Commission E. A European one health action plan against antimicrobial resistance (AMR). European  
4 554 Commission. 2017.
- 5 555 8. World Health Organization. Library of AMR national action plans 2023 [Available from:  
6 556 [https://www.who.int/teams/surveillance-prevention-control-AMR/national-action-plan-monitoring-](https://www.who.int/teams/surveillance-prevention-control-AMR/national-action-plan-monitoring-evaluation/library-of-national-action-plans)  
7 557 [evaluation/library-of-national-action-plans](https://www.who.int/teams/surveillance-prevention-control-AMR/national-action-plan-monitoring-evaluation/library-of-national-action-plans).
- 8 558 9. Frumence G, Mboera LE, Sindato C, Katale BZ, Kimera S, Metta E, et al. The governance and  
9 559 implementation of the National Action Plan on Antimicrobial Resistance in Tanzania: a qualitative study.  
10 560 *Antibiotics*. 2021;10(3):273.
- 11 561 10. Wernli D, Jørgensen PS, Harbarth S, Carroll SP, Laxminarayan R, Levrat N, et al. Antimicrobial  
12 562 resistance: the complex challenge of measurement to inform policy and the public. *PLoS Medicine*.  
13 563 2017;14(8):e1002378.
- 14 564 11. Organization WH. Monitoring and evaluation of the global action plan on antimicrobial resistance:  
15 565 framework and recommended indicators. 2019.
- 16 566 12. Jimah T, Ogunseitan O. National Action Plan on Antimicrobial Resistance: stakeholder analysis of  
17 567 implementation in Ghana. *Journal of Global Health Reports*. 2020;4:e2020067.
- 18 568 13. Khan MS, Durrance-Bagale A, Mateus A, Sultana Z, Hasan R, Hanefeld J. What are the barriers to  
19 569 implementing national antimicrobial resistance action plans? A novel mixed-methods policy analysis in  
20 570 Pakistan. *Health policy and planning*. 2020;35(8):973-82.
- 21 571 14. Chua AQ, Verma M, Hsu LY, Legido-Quigley H. An analysis of national action plans on antimicrobial  
22 572 resistance in Southeast Asia using a governance framework approach. *The Lancet Regional Health-Western*  
23 573 *Pacific*. 2021;7:100084.
- 24 574 15. Harant A. Assessing transparency and accountability of national action plans on antimicrobial  
25 575 resistance in 15 African countries. *Antimicrobial Resistance & Infection Control*. 2022;11(1):1-15.
- 26 576 16. Nair M, Zeegers M, Varghese G, Burza S. India's National Action Plan on Antimicrobial Resistance: a  
27 577 critical perspective. *Journal of Global Antimicrobial Resistance*. 2021;27:236-8.
- 28 578 17. Amin ET, Omeichu AA, Shu DM, Ekome SRE, Njumkeng C, van der Sande MAB. Control of  
29 579 antimicrobial resistance in Cameroon: Feasibility of implementing the National Action Plan. *Tropical Medicine*  
30 580 *& International Health*. 2021;26(10):1231-9.
- 31 581 18. Patel J, Harant A, Fernandes G, Mwamelo AJ, Hein W, Dekker D, et al. Measuring the global response  
32 582 to antimicrobial resistance, 2020–21: a systematic governance analysis of 114 countries. *The Lancet Infectious*  
33 583 *Diseases*. 2023.
- 34 584 19. Shabangu K, Essack SY, Duma SE. Barriers to Implementing National Action Plans on Antimicrobial  
35 585 Resistance using a One Health Approach: Policy-Makers' Perspectives from South Africa and Eswatini. *Journal*  
36 586 *of Global Antimicrobial Resistance*. 2023.
- 37 587 20. Juliana Silva Corrêa LFZ, Roberto Rubem Da Silva-Brandão, Sandi Michele de Oliveira, Lislaine  
38 588 Aparecida Fraccolli, Maria Clara Padoveze & Gloria Cordoba. The governance of antimicrobial resistance in  
39 589 Brazil: Challenges for developing and implementing a one health agenda. *Global Public Health*.  
40 590 2023;18(2190381).
- 41 591 21. da Silva Jr JB, Espinal M, Ramón-Pardo P. Antimicrobial resistance: Time for action. *Revista*  
42 592 *Panamericana de Salud Pública*. 2020;44.
- 43 593 22. Ministry of Health. National strategy for the Control of Antimicrobial resistance 2015 [Available from:  
44 594 <https://www.boletinoficial.gob.ar/pdf/linkQR/YzB6b2o4Qy9ZRDFycmZ0RFhoUThyQT09>.
- 45 595 23. EE 54429573/2018 - Prohíbe productos que contengan el principio activo de colistina, (2019).
- 46 596 24. Presidencia de la nacion. Boletin oficial de la republica de Argentina. Ley de prevencion y control de la  
47 597 resistencia a los antimicrobianos, ley 29680. 2022 [Available from:  
48 598 <https://www.boletinoficial.gob.ar/detalleAviso/primera/270118/20220824?busqueda=1>.
- 49 599 25. Ogyu A, Chan O, Littmann J, Pang HH, Lining X, Liu P, et al. National action to combat AMR: a One-  
50 600 Health approach to assess policy priorities in action plans. *BMJ global health*. 2020;5(7):e002427.
- 51 601 26. Anderson M, Schulze K, Cassini A, Plachouras D, Mossialos E. A governance framework for  
52 602 development and assessment of national action plans on antimicrobial resistance. *The Lancet Infectious*  
53 603 *Diseases*. 2019;19(11):e371-e84.
- 54 604 27. Pitchforth E, Smith E, Taylor J, Davies S, Ali G-C, d'Angelo C. Global action on antimicrobial  
55 605 resistance: lessons from the history of climate change and tobacco control policy. *BMJ Global Health*.  
56 606 2022;7(7):e009283.
- 57 607 28. United Nations. Antimicrobial Resistance Multi-Partner Trust Fund  
58 608 Countering antimicrobial resistance with a 'One Health' approach 2022 [Available from:  
59 609 <https://mptf.undp.org/fund/amr00>.
- 60 610 29. World Bank. World Bank Data 2023 [Available from: <https://data.worldbank.org/country/argentina>.  
61 611 30. Braun V, Clarke V. Using thematic analysis in psychology. *Qualitative research in psychology*.  
62 612 2006;3(2):77-101.

- 1  
2  
3 613 31. Boeije H. A purposeful approach to the constant comparative method in the analysis of qualitative  
4 614 interviews. *Quality and quantity*. 2002;36(4):391-409.
- 5 615 32. Tong A, Sainsbury P, Craig J. Consolidated criteria for reporting qualitative research (COREQ): a 32-  
6 616 item checklist for interviews and focus groups. *International journal for quality in health care*. 2007;19(6):349-  
7 617 57.
- 8 618 33. Instituto de la Promoción de la Carne Vacuna Argentina (IPCVA). Informe de faena y producción 2023  
9 619 [Available from: <http://www.ipcva.com.ar/vertext.php?id=2389>).
- 10 620 34. McCormick BP, Quiroga MP, Álvarez VE, Centrón D, Titonell P. Antimicrobial resistance  
11 621 dissemination associated with intensive animal production practices in Argentina: A systematic review and  
12 622 meta-analysis. *Revista Argentina de Microbiología*. 2022.
- 13 623 35. Rochford C, Sridhar D, Woods N, Saleh Z, Hartenstein L, Ahlawat H, et al. Global governance of  
14 624 antimicrobial resistance. *The Lancet*. 2018;391(10134):1976-8.
- 15 625 36. Pokharel S, Raut S, Adhikari B. Tackling antimicrobial resistance in low-income and middle-income  
16 626 countries. *BMJ Specialist Journals*; 2019. p. e002104.
- 17 627 37. Castro-Sanchez E, Iwami M, Ahmad R, Atun R, Holmes AH. Articulating citizen participation in  
18 628 national anti-microbial resistance plans: A comparison of European countries. *European Journal of Public  
19 629 Health*. 2018;28(5):928-34.
- 20 630 38. With a massive race, PAHO Argentina spreads the word to prevent antimicrobial resistance [press  
21 631 release]. 2022.
- 22 632 39. Hernando-Amado S, Coque TM, Baquero F, Martínez JL. Antibiotic resistance: moving from  
23 633 individual health norms to social norms in one health and global health. *Frontiers in Microbiology*.  
24 634 2020;11:1914.
- 25 635 40. Lota MMM, Chua AQ, Azupardo K, Lumangaya C, Reyes KAV, Villanueva SYAM, et al. A  
26 636 Qualitative Study on the Design and Implementation of the National Action Plan on Antimicrobial Resistance in  
27 637 the Philippines. *Antibiotics*. 2022;11(6):820.
- 28 638 41. Sirijatuphat R, Chayangsu S, Srisompong J, Ruangkriengsin D, Thamlikitkul V, Tiengrim S, et al.  
29 639 Feasibility, Challenges, and Benefits of Global Antimicrobial Resistance Surveillance System Implementation:  
30 640 Results from a Multicenter Quasi-Experimental Study. *Antibiotics*. 2022;11(3):348.
- 31 641 42. Sumpradit N, Wongkongkathep S, Poonpolsup S, Janejai N, Paveenkittiporn W, Boonyarit P, et al.  
32 642 New chapter in tackling antimicrobial resistance in Thailand. *bmj*. 2017;358.
- 33 643 43. Rossi MA, Tokumoto M, Couto E, Di Bella A, Alstchuler M, Gomez N, et al. Survey of the levels of  
34 644 antimicrobial resistance in Argentina: WHONET program-1991 to 1994. *International journal of antimicrobial  
35 645 agents*. 1995;6(2):103-10.
- 36 646 44. Dapás JI, Quirós RE. Antimicrobial stewardship in low-and middle-income countries. *Current  
37 647 Treatment Options in Infectious Diseases*. 2018;10:17-27.
- 38 648 45. Boni S, Marin GH, Campaña L, Marin L, Corso A, Risso-Patron S, et al. Disparities in antimicrobial  
39 649 consumption and resistance within a country: the case of beta-lactams in Argentina. *Revista Panamericana de  
40 650 Salud Pública*. 2021;45:e76.
- 41 651 46. Brodbelt D. Breaking new ground in antimicrobial stewardship in companion animal veterinary  
42 652 practice. *Nature Communications*. 2021;12(1):2445.
- 43 653 47. Nind L. International trends impacting antimicrobial stewardship in animal health. *Australian  
44 654 veterinary journal*. 2019;97(9):362-4.
- 45 655 48. Singleton DA, Rayner A, Brant B, Smyth S, Noble P-JM, Radford AD, et al. A randomised controlled  
46 656 trial to reduce highest priority critically important antimicrobial prescription in companion animals. *Nature  
47 657 Communications*. 2021;12(1):1593.
- 48 658 49. World Health Organization. Integrated surveillance of antimicrobial resistance in foodborne bacteria:  
49 659 application of a one health approach: guidance from the WHO Advisory Group on Integrated Surveillanec of  
50 660 Antimicrobial Resistance (AGISAR). 2017.
- 51 661 50. Jimenez CEP, Keestra SM, Tandon P, Pickering AJ, Moodley A, Cumming O, et al. One Health  
52 662 WASH: an AMR-smart integrative approach to preventing and controlling infection in farming communities.  
53 663 *BMJ Global Health*. 2023;8(3):e011263.
- 54 664 51. Mendelson M. BSAC Vanguard Series: Inequality and antibiotic resistance. *Journal of Antimicrobial  
55 665 Chemotherapy*. 2022;77(2):277-8.
- 56 666 52. Blake LJ, Häsler B, Bennani H, Mateus AL, Eastmure E, Mays N, et al. The UK Antimicrobial  
57 667 Resistance Strategy 2013–18: A Qualitative Study of International and Domestic Policy and Action Related to  
58 668 Livestock and the Food Chain. *Frontiers in Sustainable Food Systems*. 2022;6:102.
- 59 669 53. Huang Q, Liu X, Zhao G, Hu T, Wang Y. Potential and challenges of tannins as an alternative to in-  
60 670 feed antibiotics for farm animal production. *Animal Nutrition*. 2018;4(2):137-50.
- 61 671 54. Farha AK, Yang Q-Q, Kim G, Li H-B, Zhu F, Liu H-Y, et al. Tannins as an alternative to antibiotics.  
62 672 *Food Bioscience*. 2020;38:100751.

1  
2  
3 673 55. Hennink M, Kaiser BN. Sample sizes for saturation in qualitative research: A systematic review of  
4 674 empirical tests. *Social Science & Medicine*. 2022;292:114523.  
5 675  
6  
7  
8  
9  
10  
11  
12  
13  
14  
15  
16  
17  
18  
19  
20  
21  
22  
23  
24  
25  
26  
27  
28  
29  
30  
31  
32  
33  
34  
35  
36  
37  
38  
39  
40  
41  
42  
43  
44  
45  
46  
47  
48  
49  
50  
51  
52  
53  
54  
55  
56  
57  
58  
59  
60

For peer review only



1  
2  
3  
4  
5  
6  
7  
8  
9  
10  
11  
12  
13  
14  
15  
16  
17  
18  
19  
20  
21  
22  
23  
24  
25  
26  
27  
28  
29  
30  
31  
32  
33  
34  
35  
36  
37  
38  
39  
40  
41  
42  
43  
44  
45  
46  
47  
48  
49  
50  
51  
52  
53  
54  
55  
56  
57  
58  
59  
60

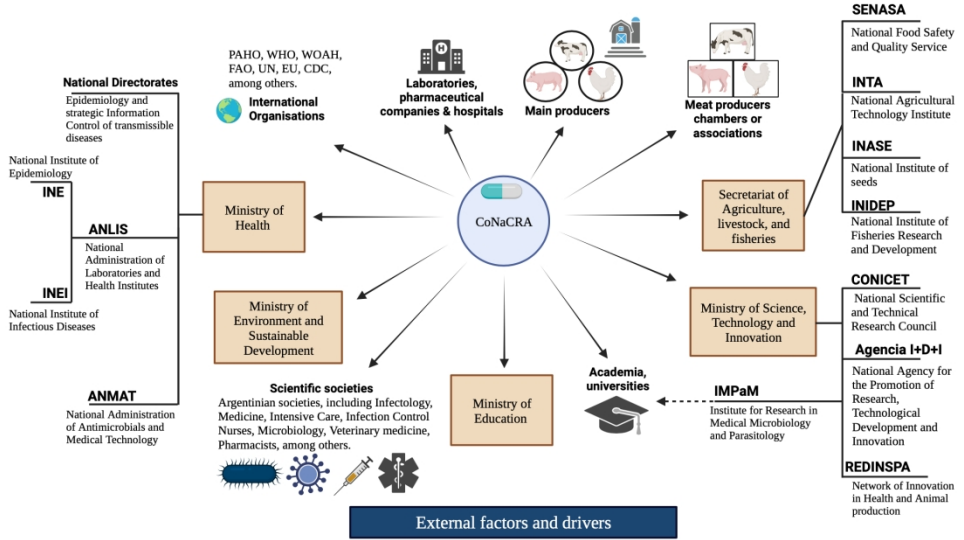

379x210mm (144 x 144 DPI)

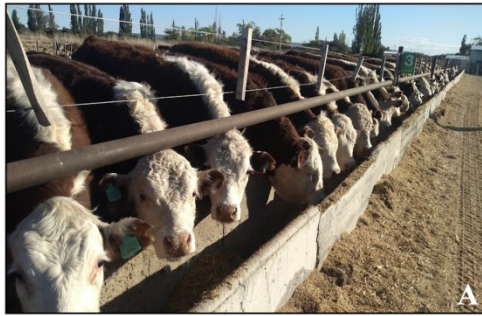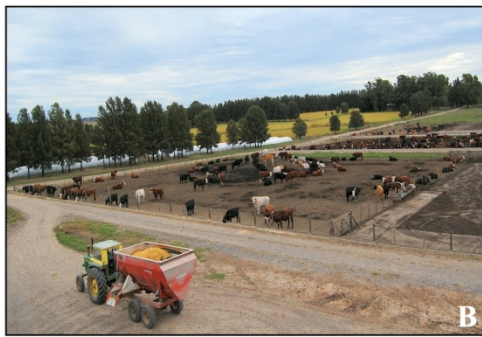

Around 52 million head of cattle are kept by livestock farmers in Argentina. The country produced 3.2 million tonnes of beef meat in 2020, of which 900,001 tonnes were exported (75% to China). However, the production chain involves a wide variety of actors and producers (from breeding, fattening, slaughtering, preservation, and sale) and the number of direct beef producers is estimated to be 230,000 with no significant market share among specific companies, compared to chicken or swine industries where three companies concentrate 70% of the market share. Although swine and chicken are amongst food-producing animals species with higher AMR rates for streptomycin, ampicillin and tetracycline resistance, there is still a research gap regarding beef-cattle from feedlots due to reduced AMR monitoring and control, including antibiotic usage. The cattle production chain is highly fragmented, and the movement dynamics of the animals through the production chain are complex, even though their transit must be registered to comply with SENASA guidelines, and all production units should be referenced in a computer database. However, in practicality, controlling thousands of animals at different production stages is challenging, and it is often hard to trace and follow to check if producers follow guidance in antibiotic use. In line with this, cattle vaccination rates against diarrheal or respiratory diseases are relatively low compared to the chicken and swine industry. Most livestock farms are family businesses where there is a partial vet role for antibiotic administration, and antibiotic storage in warehouses is often observed due to reduced control on acquisition.

C

437x291mm (144 x 144 DPI)

1  
2  
3  
4  
5  
6  
7  
8  
9  
10  
11  
12  
13  
14  
15  
16  
17  
18  
19  
20  
21  
22  
23  
24  
25  
26  
27  
28  
29  
30  
31  
32  
33  
34  
35  
36  
37  
38  
39  
40  
41  
42  
43  
44  
45  
46  
47  
48  
49  
50  
51  
52  
53  
54  
55  
56  
57  
58  
59  
60

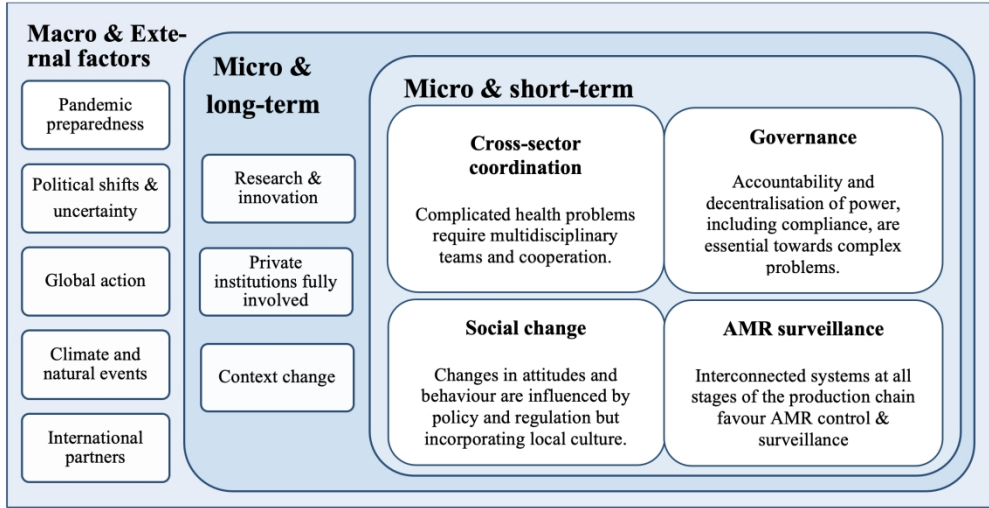

441x232mm (144 x 144 DPI)

## Supplementary Material

Opportunities and challenges in antimicrobial resistance among animal production systems and humans across stakeholders in Argentina: a qualitative and context analysis

### Table of Contents

|                                                                                                                          |    |
|--------------------------------------------------------------------------------------------------------------------------|----|
| I. Timeline containing the legislation and policies in place within the AMR spectrum in Argentina.....                   | 2  |
| II. Summary of the Argentinian National Action Plan to combat AMR .....                                                  | 4  |
| III. Consent form for interviewees (participants).....                                                                   | 8  |
| IV. Participant information sheet .....                                                                                  | 9  |
| V. Participant interview topic guide.....                                                                                | 11 |
| VI. Description of main preliminary topic codes applied to the interview analyses and their respective definitions ..... | 13 |
| VII. Themes ordered from broader to greater specificity. ....                                                            | 14 |
| VIII. Packed code cloud for identified themes/sub-themes .....                                                           | 15 |

## I. Timeline containing the legislation and policies in place within the AMR spectrum in Argentina

[1916] Creation of the formerly called Instituto Nacional de Microbiología “Malbran”, which is renamed in 1996 (see below).

[1956] Creation of the National Agricultural Technology Institute (INTA)

[1964] Act. 19 of the National Law of Medications No. 16,463. It states that "any form of advertising of products whose sale has not been authorized by prescription is prohibited" (subsection d).

[1967] National law regulating pharmaceutical activity. Also, the Directorate of Registration Inspection and Border Health of the Ministry of Health of the Nation, which upon verifying the violations of the regulations must initiate the corresponding summary actions and may conclude with the sanctions established in art. 45 of Law 17565 on the Exercise of Pharmacy Activity: warning, fine, closure of the establishment, suspension of registration and/or disqualification.

[1969] Decree number 3835/1969 of the Ministry of Public Health established that medicines with antibiotic activity for systemic use must be dispensed under a prescription filed by the dispenser, with penalties for non-compliance with: warning, fine, closure, suspension of registration, disqualification and /or prison of up to three years (Laws 17565/1967 of Practice of Pharmacy and 26524/2009 of the Penal Code)

[1970] Decree number 3835/69 (later modified by decree number 378/70) of the then Ministry of Social Welfare. It established that medicines whose active pharmaceutical ingredients (IFAs) have antibiotic activity for systemic use must be dispensed according to their registration condition of January 1, 1970. Prescriptions must be archived by correlative date and kept for a period of two years, after which the pharmacy can delete them.

[1983] Creation of the National program of epidemiology and control of hospital-acquired infections, which was implemented and monitored by the National Institute of Epidemiology (INE), decree number 2885/83.

[1986] Creation of the National Antimicrobial Resistance Surveillance Network WHONET-Argentina

[1992] Creation of the National Administration of Medicines, Food and Medical Technology (ANMAT)

[1995] Creation of the Intensified National Epidemiological Surveillance System for Hospital Infections (SIVENIH), implemented on a pilot basis and involving 25 public and private hospitals in the country.

[1996] Creation of the National Administration of Laboratories and Institutes of Health (ANLIS), decree number 1628.

[1998] Creation of the National Service of Agri-food Health and Quality (SENASA)

[2001] Creation of the Argentine Beef Promotion Institute (IPCVA), law number 25,507.

[2004] Creation of the National Hospital Infection Surveillance Program (VIHDA) to monitor hospital-acquired infections in participating hospitals.

[2007] Decree number 609 states that antimicrobials must be sold only under prescription.

[2009] Law 26,524. The dispensation of any type of medicinal product without compliance with the legal conditions of sale would be considered as a crime, which can be punished with prison for up to three years.

[2011] Decree number 666/2011 determined that any establishments having food-producing animals must keep a record book for the administration of veterinary products, subject to inspections.

[2011] Decree number 666 determined that the food-producing establishments must keep a record book of treatments subject to inspection by SENASA in which all administration of veterinary products on production animals must be recorded.

1  
2  
3  
4 [2011] Act. 36 of Decree 7123/68, regulating Law 17,565, defined that: “The acquisition and sales provided by  
5 drugstores must be made by invoice and/or separate remittance..., keeping the Documentation filed in an orderly  
6 manner, making it available to the inspectors of the Secretary of State for Public Health, at their request.  
7

8 [2011-2013] ANMAT drug traceability programs (decree number 435, National Ministry of Health) and  
9 SENASA phytosanitary and veterinary products (SENASA, decree number 369/2013), will provide data on the  
10 commercialization and distribution of antimicrobials in humans and in food-producing animals and agriculture.  
11

12 [2013] Decree number 369/2013 created the Traceability System for Phytosanitary and Veterinary Products.  
13

14 [2013] SENASA instituted the National Phytosanitary and Veterinary Products Traceability System, which  
15 reports the volume and type of antimicrobials being marketed within the veterinary products framework for  
16 commercialization. This online system involves all the parts from the commercial chain; including the  
17 manufacturer or importer of the product to the veterinarian who indicates and sells it. In this way, every time a  
18 sale is made, the seller must declare what he sold, and the buyer who accepted the sale and who assumes  
19 responsibility for the possession of the products purchased.  
20

21 [2015] Decree number 834/2015 y 391/2015. Creation of the National Action plan for the surveillance,  
22 prevention and control of antimicrobial resistance (June) in line with the creation of the national commission for  
23 the control of antimicrobial resistance (CoNaCRA).  
24

25 [2015] Decree number 591. Creation of the National Plan for the surveillance of AMR in food-producing  
26 animals (November)  
27

28 [2015] Decree number 594/2015 prohibited the inclusion of antimicrobials in animal feed. This latest regulation  
29 points to the total prohibition (in 2019) of the use of antimicrobials as promoters of animal growth.  
30

31 [2015] The National Administration of Medicines, Food and Medical Technology (ANMAT) states that the  
32 pharmaceutical labelling of antimicrobials must agree with the usual doses and treatments duration (decree  
33 number 7,130).  
34

35 [2019] SENASA states that the manufacture, distribution, import, use and possession of veterinary products  
36 containing colistin is banned from veterinary products/medicine (Decree reference: EE 54429573/2018).  
37

38 [2022] Antimicrobial resistance prevention and control law (number 27680). National statement on establishing  
39 the appropriate mechanisms to promote and control antimicrobial resistance in the country. It is remarked as a  
40 problem of national interest that perpetuates overtime.  
41

#### 42 Additional sources

43 Chapters 6.7 to 6.10 of the WOAHA (World Organisation for Animal Health) Terrestrial Animal Health Code,  
44 which range from the harmonization of national AMR surveillance programmes to methodologies for  
45 monitoring the quantities of antimicrobials used and their patterns of use, the criteria for their prudent and  
46 responsible use, and the methodology for applying risk analysis derived from the use of antimicrobials in  
47 animals throughout the food chain.  
48

49 For more details on distribution and marketing of drugs in Argentina, see  
50 [https://uk.practicallaw.thomsonreuters.com/w-014-  
51 7135?transitionType=Default&contextData=\(sc.Default\)&firstPage=true](https://uk.practicallaw.thomsonreuters.com/w-014-7135?transitionType=Default&contextData=(sc.Default)&firstPage=true)  
52  
53  
54  
55  
56  
57  
58  
59  
60

## II. Summary of the Argentinian National Action Plan to combat AMR

### General overview

The national action plan was elaborated and designed by the Ministry of Health in 2015 (16) in partnership with the following organisations:

- The National Administration of Laboratories and Health Institutes (ANLIS)
- National Administration of Medicines, Food and Medical Technology (ANMAT) and the REMEDIAR Program
- Ministry of Agriculture, Livestock and Fisheries:
- National Service of Agri-food Health and Quality (SENASA)
- National Institute of Agricultural Technology (INTA)
- National Universities of La Plata and the Centre of the Province of Buenos Aires
- Representation for the Americas of the World Organization for Animal Health (WOAH)
- Argentinean Society of Infectious Diseases (SADI)
- Argentinean Society of Intensive Care (SATI)

The three main objectives of the national strategy (action plan) are:

- a) To prevent the emergence and spread of resistant bacteria through the regulation and supervision of antimicrobial sales, the promotion of their responsible use, and the prevention and control of healthcare-associated infections.
- b) To strengthen AMR surveillance and antimicrobial usage policies.
- c) To promote innovation, non-antibiotic growth promoters, and diagnostic tests to identify resistant bacteria.

These three main objectives comprise 10 different tasks detailed in the figure below.

**Figure SM1.** Main tasks of the Argentinian National Action Plan against AMR and their respective subobjectives.

| Main 10 tasks to combat AMR in Argentina                                       | Specific actions/sub-objectives                                                                                                                                                                                                                      |
|--------------------------------------------------------------------------------|------------------------------------------------------------------------------------------------------------------------------------------------------------------------------------------------------------------------------------------------------|
| 1. Promote leadership for the prevention and control of AMR                    | To develop and conduct a strategy for the prevention and control of AMR with experts' participation.<br>To fund strategies' activity to enhance participation/awareness.                                                                             |
| 2. Surveillance of AMR in human and animal health                              | To develop a national surveillance network coordinated by reference laboratories for human health, animal health and agri-food production.                                                                                                           |
| 3. Monitor antimicrobial consumption                                           | To develop a system for monitoring sales, access and appropriate and adequate use of antimicrobials.                                                                                                                                                 |
| 4. Regulate and supervise antimicrobials usage and sales                       | To establish prescription sales requirements and monitor its effective compliance.<br>To regulate the number of antimicrobial units in the pharmaceutical industry.<br>To prohibit the use of antimicrobials as growth promoters in food production. |
| 5. Promote responsible use of antimicrobials                                   | To develop guidelines for diagnosis and treatment of most prevalent infections.<br>To train health professionals on the appropriate and adequate use of antimicrobials and healthcare-associated infection prevention and control measures.          |
| 6. Promote community participation                                             | To disseminate the problem AMR might cause in the population and the establishment of education programs on the adequate use of antimicrobials                                                                                                       |
| 7. Implementation of antimicrobial usage control mechanisms                    | To implement antimicrobial management programs in health services                                                                                                                                                                                    |
| 8. Strengthen healthcare-associated infections prevention and control programs | To develop a surveillance strategy for healthcare-associated infections.                                                                                                                                                                             |

|                                                                                                    |                                                                                                                                                                                     |
|----------------------------------------------------------------------------------------------------|-------------------------------------------------------------------------------------------------------------------------------------------------------------------------------------|
|                                                                                                    | To implement prevention and control programs for healthcare-associated infections in healthcare services                                                                            |
| 9. Promote antimicrobial research as well as diagnostic methods                                    | To establish the problem of AMR as a priority matter that should be financed and researched. To prioritise the evaluation of new antimicrobials and explore new diagnostic methods. |
| 10. Monitoring and evaluating the achievement of the objectives stated in the national action plan | To create a professional commission to monitor and evaluate the implementation and execution of the strategy (National Action Plan)                                                 |

#### Overview of the animal and agri-food related sections

### **AMR SURVEILLANCE IN ANIMAL AND AGRIFOOD PRODUCTION** **[ANIMAL HEALTH SECTION of the national action plan]**

#### **Current situation of the AMR surveillance in animal health and agri-food production**

Surveillance is necessary for 3 groups of bacteria which have been primarily found in cattle, pigs, and birds: a) “indicator” bacteria, b) zoonotic bacteria, and c) pathogenic bacteria. Indicator bacteria are part of the intestinal microbiota of humans, other mammals, birds, and insects, and their importance lies in their ability to acquire and spread resistance genes that can be transferred to pathogenic or zoonotic bacteria.

#### **Strategic lines of the national action plan for the surveillance of AMR in animal health and agri-food production**

- a) Development and implementation of the national AMR surveillance program in food-producing animals to determine the presence of resistance to different antimicrobials in at least 2 commensal bacteria: *Escherichia coli* and *Enterococcus spp*, and 2 zoonotic bacteria: *Campylobacter spp* and *Salmonella spp*
- b) Harmonization of AMR surveillance strategies in human and animal health
- c) Development of communication tools and timely dissemination of information

#### **Specific actions of the national action plan for surveillance of AMR in animal health and agri-food production**

- a) To isolate commensal and zoonotic bacteria from cattle, pigs and poultry intended for human consumption, and determine their susceptibility profile to different antimicrobials
- b) To compare the results with data obtained from previous studies, when possible
- c) To determine the prevalence of AMR by animal species and by geographic region
- d) To correlate antimicrobial consumption with AMR
- e) To characterize and correlate resistance mechanisms between bacteria obtained from animal and human samples
- f) To carry out studies on the presence of antimicrobials in different sources (including water, food, etc.) and the impact of their use on the environment and production systems
- g) To evaluate alternative therapies for the use of antibiotics as growth factor in intensive production
- h) To evaluate the impact of antimicrobial administration in sources on the level of resistance observed in the environmental bacterial population.

Specifically, the National Directorate of Agrochemicals, Veterinary Products and Food of SENASA will be responsible for:

- a) Carrying out an annual monitoring of the volume of sales of antibiotics, with the collaboration of professional associations
- b) Providing data from the veterinary product traceability system as soon as it is fully operational

### **REGULATION OF ANTIMICROBIAL CONSUMPTION IN ANIMAL HEALTH AND AGRIFOOD PRODUCTION [ANIMAL HEALTH SECTION of the national action plan]**

For more than ten years, SENASA has carried out a Program for the Control of Residuals, Contaminants and Food Hygiene of animal origin. This program seeks to detect the presence of chemical residues and contaminants in foods of animal origin that may affect the health of consumers. Among the residues under control, we find various antimicrobial agents, which can generate antimicrobial resistance when they are present in food.



1  
2  
3  
4 **Strategic lines for the regulation of the use of antimicrobials in animal health and agri-food production**

- 5 a) Development and updating of regulations on the use of antimicrobials, aimed at preserving bacterial  
6 susceptibility as a non-renewable resource  
7 b) To participate in international seminars on regulatory practices to improve animal health  
8

9 **Specific actions to regulate the use of antimicrobials in animal health and agri-food production**

- 10 a) To compile and analyse the results of the surveillance and traceability systems for veterinary products to carry  
11 out risk analyses and therefore create risk profiles  
12 b) To strengthen control protocols on the indiscriminate sales and usage of antibiotics  
13 c) To ensure that all commercialization of antibiotics be carried out by a licensed professional  
14 d) To create a forum for discussion on the use of antimicrobials with the chambers of the veterinary products  
15 industry, professional associations, universities and the Ministry of Health  
16  
17

18 **RESPONSIBLE USE OF ANTIMICROBIALS IN ANIMAL HEALTH AND AGRIFOOD**  
19 **PRODUCTION [ANIMAL HEALTH SECTION of the national action plan]**  
20  
21

22 **Objectives:**

- 23 a) To ensure the rational use of antimicrobial agents in animals, with a view to optimizing their efficacy and  
24 safety  
25 b) To comply with the ethical obligation and the economic need to keep the animals in good health  
26 c) To prevent or reduce the transfer of resistant microorganisms or resistance determinants within animal  
27 populations, their environment and between animals and humans  
28 d) To contribute to maintaining the efficacy and usefulness of antimicrobial agents used in human and  
29 veterinary medicine  
30 e) To protect consumer health by ensuring the safety of foods of animal origin in relation to residues of  
31 antimicrobial agents

32 The measures include actions at the level of all stages and actors involved in the antimicrobial usage cycle, from  
33 their registration in SENASA to their prescription, marketing and consumption. The regulations generated by  
34 SENASA in recent years, have incorporated product traceability and treatment records, which are also in line  
35 with the WOA Code.  
36

37 **Strategic lines for the responsible use of antimicrobials in animal health and agri-food production**

- 38 a) Development of knowledge, training and information for veterinary professionals on the prudent and  
39 responsible use of antibiotics, based on pharmacokinetic, pharmacodynamic and toxicological bases  
40 b) Intensification of marketing controls for antimicrobials usage and dispensing  
41 c) To regulate the use of antimicrobials based on the information obtained from the surveillance program, and  
42 the corresponding risk analysis  
43 d) To increase pharmacological knowledge about the behaviour of antibiotic considering its impact on the  
44 environment  
45 e) To control the evolution of antibiotic resistance bacteria in clinics of small animals and intensive productions  
46 f) To promote the responsible use of antimicrobials, including their correct prescription and administration by  
47 veterinarians

48 **Specific actions for the responsible use of antimicrobials in animal health and food production**

- 49 a) To prepare a good-practice guide for the prescription and use of antimicrobials and other veterinary products,  
50 and in line with international guidelines  
51 b) To organise training courses and workshops for free practice veterinarians and those who work in the  
52 marketing chain or are in charge of livestock farms and balanced feed production plants, in conjunction with  
53 universities, professional associations and technical groups of exchange of the different productive activities  
54 (pigs, poultry, cattle, etc.)  
55 c) To incorporate AMR in the curriculum of veterinary careers, in joint work with the National Council of  
56 Veterinary Sciences  
57 d) To sustain and strengthen control in all stages of the distribution process and use of antimicrobials  
58  
59  
60

1  
2  
3  
4 **PREVENTION AND CONTROL OF INFECTIONS IN ANIMAL HEALTH AND AGRIFOOD**  
5 **PRODUCTION [ANIMAL HEALTH SECTION of the national action plan]**  
6

7 There are current international standards highlighting antimicrobials usage, including the Chapters 6.7 to 6.10 of  
8 the WOAH Terrestrial Animal Health Code.  
9

10 **Strategic lines for the prevention and control of infections in animal health**

- 11 a) To develop programs for the management, prevention and control of infectious diseases associated with AMR  
12 in veterinary medicine, considering the biosafety of intensive production establishments in terms of  
13 infrastructure and adequate equipment for infection prevention and control practices  
14 b) To train technical personnel assigned to intensive animal production for the prevention and control of  
15 infectious diseases in production environments; and  
16 c) Implementation of a network of laboratories for the identification of AMR microorganisms  
17

18 **Specific actions for the prevention and control of infections in animal health**

- 19 a) To develop regulations to enhance infection prevention and control between the Ministry of Agriculture,  
20 Livestock and Fisheries, the Ministry of Health, universities and professional associations  
21 b) To carry out training courses for veterinary professionals. Courses would be delivered by the Ministry of  
22 Agriculture, Livestock and Fisheries, the Ministry of Health, professional associations and universities  
23 c) To promote biosafety, hygiene and disinfection of personnel, equipment and productive environment  
24 compliance.  
25 d) To generate new laboratories equipped with diagnosis tools to determine the levels of AMR bacteria isolated  
26 from food animals and the emergence of resistance mechanisms to critical antimicrobials in human and animal  
27 health, as well as the proper use of antimicrobials  
28 e) Develop a monitoring and evaluation program to adopt joint strategies between the veterinary and human  
29 areas  
30

31 Also, SENASA, with the cooperation of ANLIS, INTA, and veterinary schools of national universities,  
32 implemented a parallel surveillance program for AMR in food-producing animals. The main objective of the  
33 plan is to determine and monitor the prevalence of AMR among food-producing animals to avoid the emergence  
34 and dissemination and to minimise the damage to the population and animal health (20). The program was  
35 designed in partnership with the following institutions: National Directorate of Agrochemicals, Veterinary  
36 Products and Food, National Directorate of Food Safety and Quality, National Directorate of Animal Health,  
37 General Directorate of Laboratories and Technical Control, and the General Coordination of Regional  
38 Management.  
39  
40  
41  
42  
43  
44  
45  
46  
47  
48  
49  
50  
51  
52  
53  
54  
55  
56  
57  
58  
59  
60

### III. Consent form for interviewees (participants)

Please initial box

1. I confirm that I have read and understood the Participant Information Sheet for the above study.
2. I have been given the opportunity to consider the information provided, ask questions and have had these questions answered to my satisfaction.
3. I understand that my participation is voluntary and that I can ask to withdraw before or during the interview without giving a reason and without my medical care or legal rights being affected. After the interview has been conducted and/or after data analyses, data will be anonymised and it will not be possible to withdraw.
4. I understand that my anonymised data will be stored for a minimum of 5 years and may be used in future ethically approved research.
5. I consent to this interview being recorded for the purpose of transcription after which the recording will be deleted.
6. I agree to take part in this interview.

Name of person giving consent

Date

Signature

\_\_\_\_\_

\_\_\_\_\_

\_\_\_\_\_

Name of person taking consent

Date

Signature

\_\_\_\_\_

\_\_\_\_\_

\_\_\_\_\_

## IV. Participant information sheet

You are being invited to take part in an interview on:

Agricultural antimicrobial supply chains and implementation of Antimicrobial Resistance National Action Plans in Argentina and the United Kingdom

Prof Lisa Boden, Prof Dominic Moran, Dr Emma Pitchforth, Dr Stephen Mackenzie, and Alejandro Petroni at the University of Edinburgh, University of Exeter and Argentinian National Administration of Laboratories and Health Institutes are facilitating these interviews/focus groups. Before you decide to take part, it is important you understand why we are conducting this interview and what it will involve. Please take time to read the following information carefully.

### **WHAT IS THE PURPOSE OF THIS INTERVIEW?**

This interview is intended to gather information about the current communication and interfacing between policy makers, scientific experts and stakeholders in agricultural Antimicrobial resistance and National Action Plan. Our long-term goal is to build relevant expertise to be able to design robust interventions and advice to improve antimicrobial resistance and national action plan implementation outcomes in the policy.

### **WHY HAVE I BEEN INVITED TO TAKE PART?**

You are invited to participate in this study because you have been working on or exposed to agricultural antimicrobial resistance decision-making issues in policy, either in the United Kingdom or Argentina.

### **DO I HAVE TO TAKE PART?**

No – it is entirely up to you whether you choose to take part. If you do decide to take part, please keep this Information Sheet and complete the Informed Consent Form to show that you understand your rights in relation to the meeting and that you are happy to participate. You may withdraw from an interview at any time and without giving a reason.

### **WHAT WILL HAPPEN IF I DECIDE TO TAKE PART?**

You will be invited to participate in a series of interviews and/or focus groups around agricultural antimicrobial resistance, antimicrobial supply and antimicrobial national action plans and how they are perceived and incorporated into policy decision making spaces and processes. Your expertise will allow us to work over the next three years on developing a series of robust suggestions to improve the science policy interface around antimicrobial resistance in both the UK and Argentina.

### **WHAT ARE THE POSSIBLE BENEFITS OF TAKING PART?**

By participating in this discussion and sharing your experiences with us, you will be helping the research team to engage and participate with local and national policy decision-makers around integration of scientific and policy-making expertise in mitigating the risks of antimicrobial resistance.

### **ARE THERE ANY RISKS ASSOCIATED WITH TAKING PART?**

There are no significant risks associated with participation.

### **WHAT IF I WANT TO WITHDRAW FROM THE STUDY?**

Agreeing to participate in this workshop does not oblige you to remain in the project nor have any further obligation to this project. If you no longer want to be part of the project, please inform Prof Lisa Boden [lisa.boden@ed.ac.uk]. You should note that your ideas may be used in the design and implementation of subsequent projects and interventions. You are advised to contact the research team at the earliest opportunity, preferably before the workshop should you wish to withdraw from the project.

### **INTERVIEWERS AND INTERVIEW'S DETAILS**

The interview will be performed by either our main researchers (detailed in the first paragraph) or Kasim Allel, who is a research fellow at the University of Exeter. The interview will take place at a time and

1  
2  
3 platform (virtual meeting via Zoom/Microsoft teams or in-person meetings) agreed upon both parties  
4 and depending on availability. The interview has five different stages covering participant's current  
5 role, understanding antimicrobial-resistance among stakeholders, information channels and flows  
6 within stakeholders/departments, challenges in the implementation of the national action plan, and  
7 future considerations. The interview has an approximate duration of 30-60 minutes per interview.  
8

### 9 **DATA PROTECTION AND CONFIDENTIALITY**

10 Any data collected will be processed in accordance with Data Protection Law and GDPR. All  
11 information collected about you will be kept strictly confidential. Unless they are anonymised in our  
12 records, your data will be referred to by a unique participant number rather than by name. Your data  
13 will only be viewed by the researcher/research team. Data might be classified by organisation/affiliation  
14 only if participants concur. All electronic data and transcripts will be stored on a password-protected  
15 computer file within Microsoft teams' shared folders. All paper records will be held in a locked filing  
16 cabinet. Your consent information will be kept separately from your responses to minimise risks.  
17

### 18 **WHAT WILL HAPPEN WITH THE RESULTS OF THIS STUDY?**

19 The outcomes of this meeting may also be summarised in reports and presentations to the funding  
20 agency or key stakeholders. The meeting may be video and audio recorded for the purpose of  
21 transcription. Quotes or key findings will always be made anonymous in any formal outputs unless we  
22 have your prior and explicit written permission to attribute them to you by name. Information may also  
23 be kept for future research.  
24

### 25 **WHO CAN I CONTACT?**

26 If you have any further questions about the project, please contact Prof. Lisa Boden,  
27 [lisa.boden@ed.ac.uk](mailto:lisa.boden@ed.ac.uk)  
28

29 If you wish to make a complaint about the project, please contact:  
30

31 Lisa Boden ([lisa.boden@ed.ac.uk](mailto:lisa.boden@ed.ac.uk)). In your communication, please provide the study title and detail  
32 the nature of your complaint.  
33

34 For general information about how we use your data go to:  
35

36 <https://www.ed.ac.uk/records-management/privacy-notice-research>  
37  
38  
39  
40  
41  
42  
43  
44  
45  
46  
47  
48  
49  
50  
51  
52  
53  
54  
55  
56  
57  
58  
59  
60

## V. Participant interview topic guide

You are being invited to take part in an interview on:

Agricultural antimicrobial supply chains and implementation of Antimicrobial Resistance National Action Plans in Argentina and the United Kingdom

[Please note this is a topic guide to support the semi-structured interviews. We do not envisage asking every question to every participant, but the questions are illustrative of what we hope to talk about]

### Introduction

Thank you for agreeing to take part in this interview.

Can I check that you have had a chance to read the study information sheet?

Do you have any questions about the study?

[if not returned prior to interview go through and complete consent form]

Are you happy for me to begin the interview and to start recording?

[turn on recorder]

Thank you.

The interview is designed to be free-flowing so please talk about anything that you feel is relevant, I have just prepared some questions structured into five broad areas.

### Interview's questionnaire

**BOX 1.** Survey's main sections: objectives and questions

**I. Participant's current role.** These questions will seek to understand what experiences our participants have and how they might be relevant to implementing the National Action Plan to combat AMR.

<1> What your job/role is, and what tasks do you and your organisation mainly perform?

<2> What are your (or department/organisation) interests and responsibilities concerning AMR?

**II. Understanding AMR among stakeholders.** This group of questions aim to understand employees' and organisations' views on AMR; its main drivers, change overtime, support venues, and priority areas within organisations to help tackle AMR.

<1> How do you feel (or what are your personal and department's concerns) about antimicrobial resistance in humans? Does that differ from antimicrobial-resistance in animals or any other source, including the environment (how)?

<2> Do you think the view about antimicrobial-resistance has changed over the years? How?

<3> What are the priority areas within your organisation to increase AMR awareness and to comply with the national action plan? Do you feel your organisation help contribute to any of the areas detailed in the national plan (how, which)?

<4> What are the cornerstones for increasing AMR awareness while complying with the national action plan within your organisation?

<5> Which cornerstones do you feel are most relevant within your department (organisation)? Why?

1  
2  
3  
4  
5  
6  
7  
8  
9  
10  
11  
12  
13  
14  
15  
16  
17  
18  
19  
20  
21  
22  
23  
24  
25  
26  
27  
28  
29  
30  
31  
32  
33  
34  
35  
36  
37  
38  
39  
40  
41  
42  
43  
44  
45  
46  
47  
48  
49  
50  
51  
52  
53  
54  
55  
56  
57  
58  
59  
60

**III. Information channels and flow within stakeholders/departments.** These questions attempt to improve organisations decision making towards better AMR surveillance by identifying how the information is channelled within and between organisations.

<1> how do you feel about AMR-related information and communication flow within your organisation and among all stakeholders?

<2> What do you think about communicational interactions, networking, and educational or getting-to-know instances between your organisation and other stakeholders and within departments of your organisation? Would you believe (and how) that the information pathways vary between specific organisation's fields/disciplines, public/private institutions, or certain other groups?

<3> Could you identify which organisms (organisations), and how, are involved in your organisation's decision making and strategy towards improving AMR surveillance and control?

**IV. Challenges in the implementation of the national action plan.** These questions attempt to answer what factors or challenges might be key to increasing AMR awareness and improving AMR surveillance among food-producing animals and agriculture.

<1> Do you feel there is any challenge that your organisation faces in complying with the AMR national action plan and helping contribute to better animal surveillance? (Political priorities, monetary and non-monetary resources, communication, etc) What are the most important and what can be done to overcome these challenges if your organisation could prioritise resources to contribute higher to AMR surveillance in animals?

<2> Who else do you think has a critical role in helping with AMR surveillance in animals from the pool of stakeholders?

**V. Future and other considerations.** These questions aim to understand future steps to be taken within the industry and different key members to tackle AMR

<1> How organisations might be helped to enhance cross-communication and teamwork? How can we ensure organisations make progress and collaborate meeting NAP's criteria?

<2> Which organisations, at the national and international levels, do you think are most important to talk to and direct the efforts to address the gap in knowledge in AMR? Does the list differ for improving the NAP?

<3> Is there anything else important that you might want to share with us or that we are missing in the current interview?

## VI. Description of main preliminary topic codes applied to the interview analyses and their respective definitions

**Table SM1. Topic codes and their definitions**

| Code                                                     | Definition                                                                                                             |
|----------------------------------------------------------|------------------------------------------------------------------------------------------------------------------------|
| Application of NAP                                       | Implementation of NAP and roles, including views on progress                                                           |
| AMR control                                              | Perceived progress and challenges, inclusive of surveillance                                                           |
| Antibiotic access, use and regulation (human and animal) | Referring to antibiotic consumption and access and prescriptions in animals and humans                                 |
| Alternatives to antibiotics                              | Discussion of alternatives to antibiotics                                                                              |
| Context of Covid                                         | Referring to acceleration of AMR, potential opportunities and good practice, ways of working                           |
| Governance                                               | Government priorities, federalisation, vertical vs horizontal, nature of institutions/groups, accountability (lack of) |
| AMR knowledge/awareness                                  | Referring to public and professional awareness – the challenge of awareness and steps taken to address                 |
| Resources                                                | Referring to human and economic/budgetary resource (lack of) available to tackle AMR                                   |
| Stakeholders                                             | Describing/listing stakeholders involved                                                                               |
| Stakeholder communication                                | Communication (lack of) between stakeholders                                                                           |
| Cultural and country context                             | Understanding of importance of cultural, country context, including personal relationships                             |
| International actors and policies                        | Mention of international actors and role in/influence on national AMR in Argentina                                     |
| Food production                                          | Reference to food production markets, differences by animal species                                                    |
| Information/data flow                                    | All references, specifically to information/data e.g. capacity/system to share data                                    |
| Regulation and compliance                                | Description of different regulation, proposed change and perceived (potential) impact                                  |
| Political context and agenda //                          | Importance of (changing) political will                                                                                |
| Vet sector                                               | Including role of vet sector, antibiotic in animals                                                                    |
| Training and learning opportunities                      | Including seminars, conferences, courses, stewardship programs, etc.                                                   |



## VII. Themes ordered from broader to greater specificity.

Figure SM2. Structure of the ordered themes

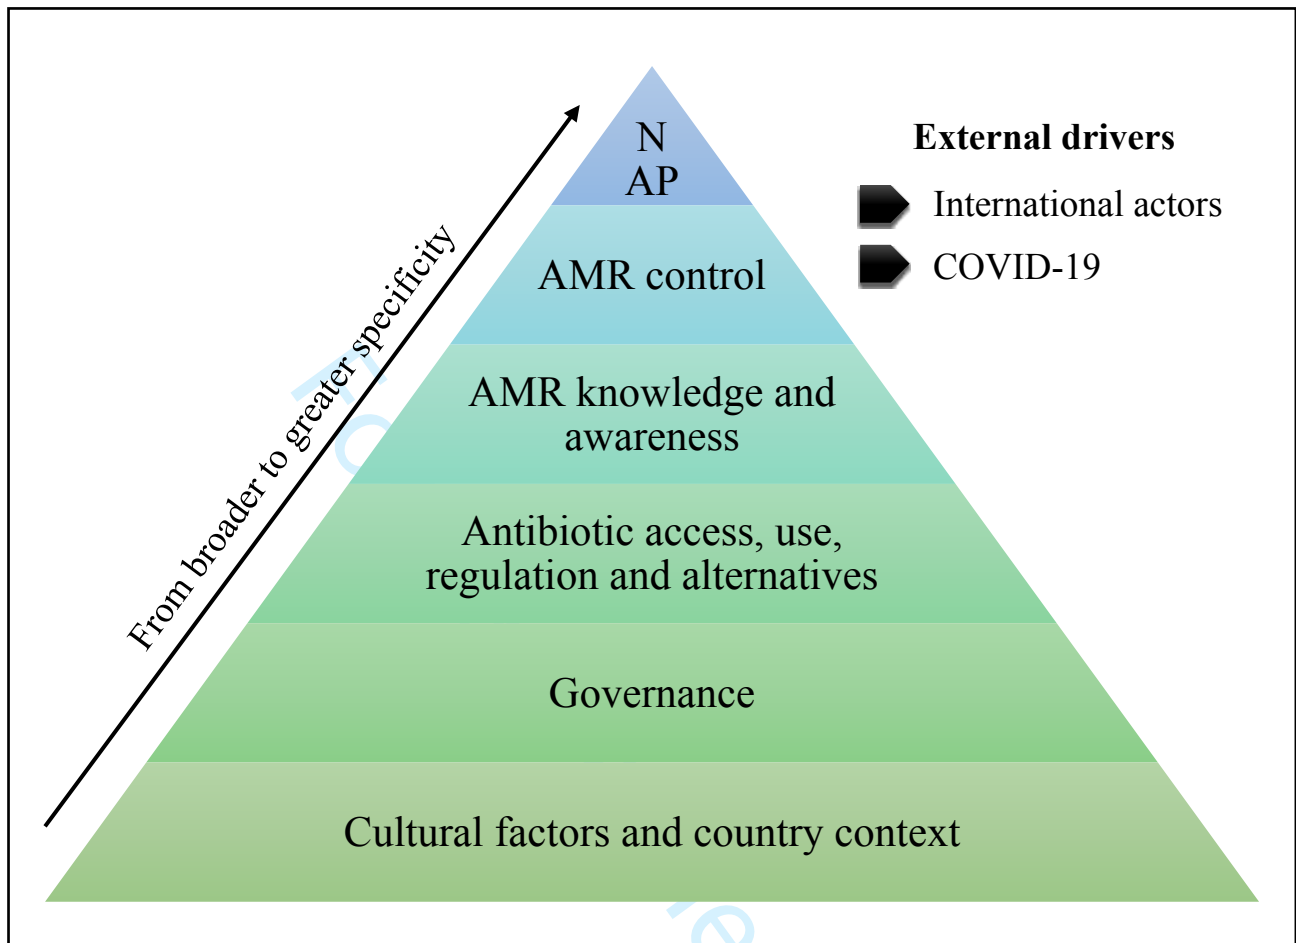

Notes: AMR= Antimicrobial resistance. NAP= National action plan.

## VIII. Packed code cloud for identified themes/sub-themes

Figure SM3. Code cloud for identified themes and sub-themes

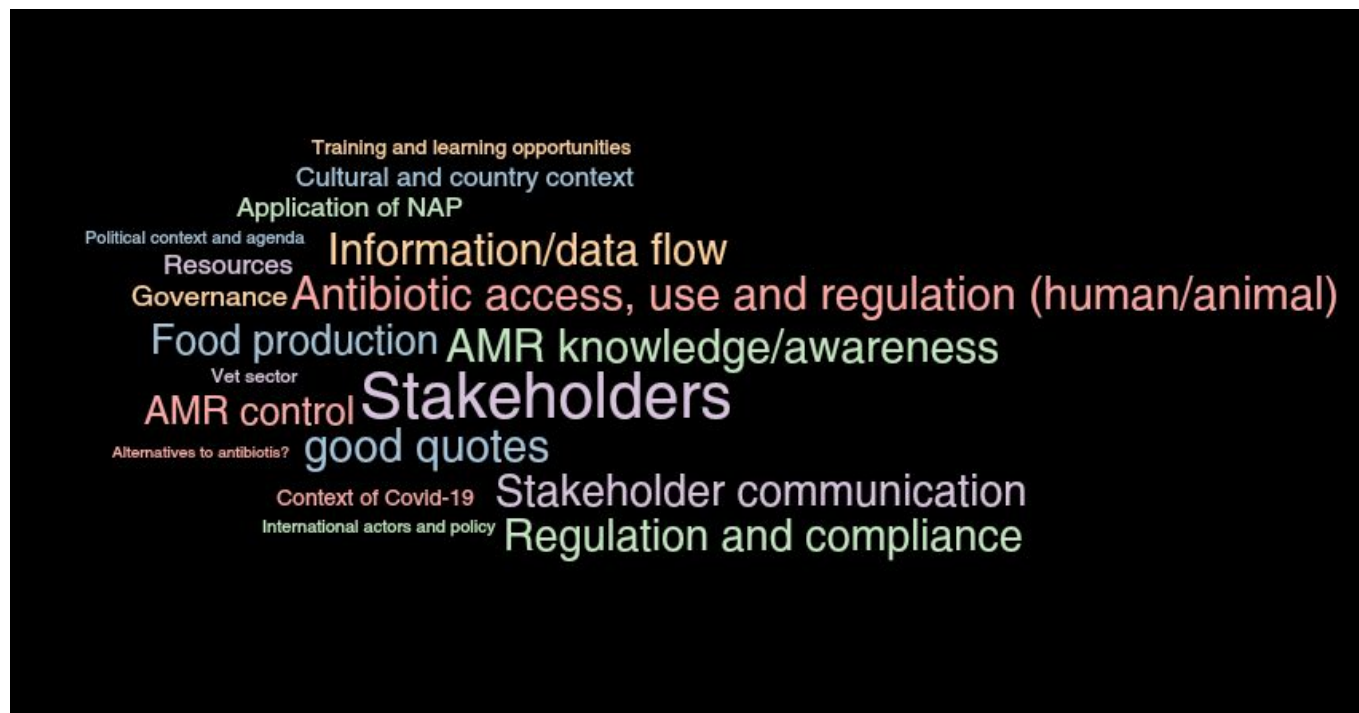

Notes: AMR= Antimicrobial resistance

review only

## STROBE Statement—checklist of items that should be included in reports of observational studies

|                              | Item No | Recommendation                                                                                                                                                                                                                                                                                                                                                                                                                                                         | Page No |
|------------------------------|---------|------------------------------------------------------------------------------------------------------------------------------------------------------------------------------------------------------------------------------------------------------------------------------------------------------------------------------------------------------------------------------------------------------------------------------------------------------------------------|---------|
| <b>Title and abstract</b>    | 1       | (a) Indicate the study's design with a commonly used term in the title or the abstract                                                                                                                                                                                                                                                                                                                                                                                 | 1       |
|                              |         | (b) Provide in the abstract an informative and balanced summary of what was done and what was found                                                                                                                                                                                                                                                                                                                                                                    | 1       |
| <b>Introduction</b>          |         |                                                                                                                                                                                                                                                                                                                                                                                                                                                                        |         |
| Background/rationale         | 2       | Explain the scientific background and rationale for the investigation being reported                                                                                                                                                                                                                                                                                                                                                                                   | 3       |
| Objectives                   | 3       | State specific objectives, including any prespecified hypotheses                                                                                                                                                                                                                                                                                                                                                                                                       | 3       |
| <b>Methods</b>               |         |                                                                                                                                                                                                                                                                                                                                                                                                                                                                        |         |
| Study design                 | 4       | Present key elements of study design early in the paper                                                                                                                                                                                                                                                                                                                                                                                                                | 3-4     |
| Setting                      | 5       | Describe the setting, locations, and relevant dates, including periods of recruitment, exposure, follow-up, and data collection                                                                                                                                                                                                                                                                                                                                        | 4       |
| Participants                 | 6       | (a) <i>Cohort study</i> —Give the eligibility criteria, and the sources and methods of selection of participants. Describe methods of follow-up<br><i>Case-control study</i> —Give the eligibility criteria, and the sources and methods of case ascertainment and control selection. Give the rationale for the choice of cases and controls<br><i>Cross-sectional study</i> —Give the eligibility criteria, and the sources and methods of selection of participants | 4       |
|                              |         | (b) <i>Cohort study</i> —For matched studies, give matching criteria and number of exposed and unexposed<br><i>Case-control study</i> —For matched studies, give matching criteria and the number of controls per case                                                                                                                                                                                                                                                 | n/a     |
| Variables                    | 7       | Clearly define all outcomes, exposures, predictors, potential confounders, and effect modifiers. Give diagnostic criteria, if applicable                                                                                                                                                                                                                                                                                                                               | n/a     |
| Data sources/<br>measurement | 8*      | For each variable of interest, give sources of data and details of methods of assessment (measurement). Describe comparability of assessment methods if there is more than one group                                                                                                                                                                                                                                                                                   | 4       |
| Bias                         | 9       | Describe any efforts to address potential sources of bias                                                                                                                                                                                                                                                                                                                                                                                                              | 5       |
| Study size                   | 10      | Explain how the study size was arrived at                                                                                                                                                                                                                                                                                                                                                                                                                              | 4       |
| Quantitative variables       | 11      | Explain how quantitative variables were handled in the analyses. If applicable, describe which groupings were chosen and why                                                                                                                                                                                                                                                                                                                                           | 4-5     |
| Statistical methods          | 12      | (a) Describe all statistical methods, including those used to control for confounding                                                                                                                                                                                                                                                                                                                                                                                  | 4-5     |
|                              |         | (b) Describe any methods used to examine subgroups and interactions                                                                                                                                                                                                                                                                                                                                                                                                    | 4-5     |
|                              |         | (c) Explain how missing data were addressed                                                                                                                                                                                                                                                                                                                                                                                                                            | n/a     |
|                              |         | (d) <i>Cohort study</i> —If applicable, explain how loss to follow-up was addressed<br><i>Case-control study</i> —If applicable, explain how matching of cases and controls was addressed<br><i>Cross-sectional study</i> —If applicable, describe analytical methods taking account of sampling strategy                                                                                                                                                              | n/a     |
|                              |         | (e) Describe any sensitivity analyses                                                                                                                                                                                                                                                                                                                                                                                                                                  |         |

Continued on next page

| <b>Results</b>           |     |                                                                                                                                                                                                              |                       |
|--------------------------|-----|--------------------------------------------------------------------------------------------------------------------------------------------------------------------------------------------------------------|-----------------------|
| Participants             | 13* | (a) Report numbers of individuals at each stage of study—eg numbers potentially eligible, examined for eligibility, confirmed eligible, included in the study, completing follow-up, and analysed            | 5-6                   |
|                          |     | (b) Give reasons for non-participation at each stage                                                                                                                                                         | 5                     |
|                          |     | (c) Consider use of a flow diagram                                                                                                                                                                           | Figure 1, page 5-6    |
| Descriptive data         | 14* | (a) Give characteristics of study participants (eg demographic, clinical, social) and information on exposures and potential confounders                                                                     | 5-14                  |
|                          |     | (b) Indicate number of participants with missing data for each variable of interest                                                                                                                          | 5                     |
|                          |     | (c) <i>Cohort study</i> —Summarise follow-up time (eg, average and total amount)                                                                                                                             | n/a                   |
| Outcome data             | 15* | <i>Cohort study</i> —Report numbers of outcome events or summary measures over time                                                                                                                          | n/a                   |
|                          |     | <i>Case-control study</i> —Report numbers in each exposure category, or summary measures of exposure                                                                                                         | n/a                   |
|                          |     | <i>Cross-sectional study</i> —Report numbers of outcome events or summary measures                                                                                                                           | 5-13                  |
| Main results             | 16  | (a) Give unadjusted estimates and, if applicable, confounder-adjusted estimates and their precision (eg, 95% confidence interval). Make clear which confounders were adjusted for and why they were included | n/a qualitative study |
|                          |     | (b) Report category boundaries when continuous variables were categorized                                                                                                                                    | n/a qualitative study |
|                          |     | (c) If relevant, consider translating estimates of relative risk into absolute risk for a meaningful time period                                                                                             | n/a qualitative study |
| Other analyses           | 17  | Report other analyses done—eg analyses of subgroups and interactions, and sensitivity analyses                                                                                                               | 5-13                  |
| <b>Discussion</b>        |     |                                                                                                                                                                                                              |                       |
| Key results              | 18  | Summarise key results with reference to study objectives                                                                                                                                                     | 14-15                 |
| Limitations              | 19  | Discuss limitations of the study, taking into account sources of potential bias or imprecision. Discuss both direction and magnitude of any potential bias                                                   | 16                    |
| Interpretation           | 20  | Give a cautious overall interpretation of results considering objectives, limitations, multiplicity of analyses, results from similar studies, and other relevant evidence                                   | 16                    |
| Generalisability         | 21  | Discuss the generalisability (external validity) of the study results                                                                                                                                        | 16                    |
| <b>Other information</b> |     |                                                                                                                                                                                                              |                       |
| Funding                  | 22  | Give the source of funding and the role of the funders for the present study and, if applicable, for the original study on which the present article is based                                                | 16-17                 |

\*Give information separately for cases and controls in case-control studies and, if applicable, for exposed and unexposed groups in cohort and cross-sectional studies.

**Note:** An Explanation and Elaboration article discusses each checklist item and gives methodological background and published examples of transparent reporting. The STROBE checklist is best used in conjunction with this article (freely

1  
2 available on the Web sites of PLoS Medicine at <http://www.plosmedicine.org/>, Annals of Internal Medicine at  
3 <http://www.annals.org/>, and Epidemiology at <http://www.epidem.com/>). Information on the STROBE Initiative is  
4 available at [www.strobe-statement.org](http://www.strobe-statement.org).  
5  
6  
7  
8  
9  
10  
11  
12  
13  
14  
15  
16  
17  
18  
19  
20  
21  
22  
23  
24  
25  
26  
27  
28  
29  
30  
31  
32  
33  
34  
35  
36  
37  
38  
39  
40  
41  
42  
43  
44  
45  
46  
47  
48  
49  
50  
51  
52  
53  
54  
55  
56  
57  
58  
59  
60

For peer review only

# BMJ Open

## Opportunities and challenges in antimicrobial resistance policy including animal production systems and humans across stakeholders in Argentina: a context and qualitative analysis

|                                 |                                                                                                                                                                                                                                                                                                                                                                                                                                                                                                                                                                                                                                                                                                                                                                                                                                                                          |
|---------------------------------|--------------------------------------------------------------------------------------------------------------------------------------------------------------------------------------------------------------------------------------------------------------------------------------------------------------------------------------------------------------------------------------------------------------------------------------------------------------------------------------------------------------------------------------------------------------------------------------------------------------------------------------------------------------------------------------------------------------------------------------------------------------------------------------------------------------------------------------------------------------------------|
| Journal:                        | <i>BMJ Open</i>                                                                                                                                                                                                                                                                                                                                                                                                                                                                                                                                                                                                                                                                                                                                                                                                                                                          |
| Manuscript ID                   | bmjopen-2023-082156.R1                                                                                                                                                                                                                                                                                                                                                                                                                                                                                                                                                                                                                                                                                                                                                                                                                                                   |
| Article Type:                   | Original research                                                                                                                                                                                                                                                                                                                                                                                                                                                                                                                                                                                                                                                                                                                                                                                                                                                        |
| Date Submitted by the Author:   | 08-Apr-2024                                                                                                                                                                                                                                                                                                                                                                                                                                                                                                                                                                                                                                                                                                                                                                                                                                                              |
| Complete List of Authors:       | <p>Allel, Kasim; London School of Hygiene &amp; Tropical Medicine; University of Exeter, Faculty of Health and Life Sciences</p> <p>Fernandez-Miyakawa, Mariano; Instituto Nacional de Tecnología Agropecuaria</p> <p>Gaze, William; University of Exeter, Faculty of Health and Life Sciences</p> <p>Petroni, Alejandro; Instituto Nacional de Enfermedades Infecciosas</p> <p>Corso, Alejandra; Instituto Nacional de Enfermedades Infecciosas</p> <p>Luna, Federico; Independent researcher</p> <p>Barcelona, Laura; Comisión Nacional de Control de la Resistencia Antimicrobiana</p> <p>Argentina, AMR policy research group; Full list of authors provided at the end of the manuscript</p> <p>Boden, Lisa; University of Edinburgh Royal Dick School of Veterinary Studies</p> <p>Pitchforth, Emma; University of Exeter, Faculty of Health and Life Sciences</p> |
| <b>Primary Subject Heading</b>: | Public health                                                                                                                                                                                                                                                                                                                                                                                                                                                                                                                                                                                                                                                                                                                                                                                                                                                            |
| Secondary Subject Heading:      | Global health, Communication, Public health                                                                                                                                                                                                                                                                                                                                                                                                                                                                                                                                                                                                                                                                                                                                                                                                                              |
| Keywords:                       | Public health < INFECTIOUS DISEASES, Health policy < HEALTH SERVICES ADMINISTRATION & MANAGEMENT, QUALITATIVE RESEARCH                                                                                                                                                                                                                                                                                                                                                                                                                                                                                                                                                                                                                                                                                                                                                   |
|                                 |                                                                                                                                                                                                                                                                                                                                                                                                                                                                                                                                                                                                                                                                                                                                                                                                                                                                          |

SCHOLARONE™  
Manuscripts



I, the Submitting Author has the right to grant and does grant on behalf of all authors of the Work (as defined in the below author licence), an exclusive licence and/or a non-exclusive licence for contributions from authors who are: i) UK Crown employees; ii) where BMJ has agreed a CC-BY licence shall apply, and/or iii) in accordance with the terms applicable for US Federal Government officers or employees acting as part of their official duties; on a worldwide, perpetual, irrevocable, royalty-free basis to BMJ Publishing Group Ltd ("BMJ") its licensees and where the relevant Journal is co-owned by BMJ to the co-owners of the Journal, to publish the Work in this journal and any other BMJ products and to exploit all rights, as set out in our [licence](#).

The Submitting Author accepts and understands that any supply made under these terms is made by BMJ to the Submitting Author unless you are acting as an employee on behalf of your employer or a postgraduate student of an affiliated institution which is paying any applicable article publishing charge ("APC") for Open Access articles. Where the Submitting Author wishes to make the Work available on an Open Access basis (and intends to pay the relevant APC), the terms of reuse of such Open Access shall be governed by a Creative Commons licence – details of these licences and which [Creative Commons](#) licence will apply to this Work are set out in our licence referred to above.

Other than as permitted in any relevant BMJ Author's Self Archiving Policies, I confirm this Work has not been accepted for publication elsewhere, is not being considered for publication elsewhere and does not duplicate material already published. I confirm all authors consent to publication of this Work and authorise the granting of this licence.

# Opportunities and challenges in antimicrobial resistance policy including animal production systems and humans across stakeholders in Argentina: a context and qualitative analysis

Kasim Allel<sup>1,2</sup>, Mariano Fernandez-Miyakawa<sup>3</sup>, William Gaze<sup>1</sup>, Alejandro Petroni<sup>4</sup>, Alejandra Corso<sup>4</sup>, Laura Barcelona<sup>6</sup>, Federico Luna<sup>7</sup>, AMR policy research group Argentina<sup>†</sup>, Lisa Boden<sup>5</sup>, Emma Pitchforth<sup>1,\*</sup>

<sup>1</sup> Faculty of Health and Life Sciences, University of Exeter, Exeter, UK

<sup>2</sup> Department of Disease Control, London School of Hygiene and Tropical Medicine, London, UK

<sup>3</sup> Instituto Nacional de Tecnología Agropecuaria Castelar, Buenos Aires, Argentina

<sup>4</sup> Servicio Antimicrobianos, Instituto Nacional de Enfermedades Infecciosas, ANLIS “Dr Carlos G. Malbrán”, Buenos Aires, Argentina.

<sup>5</sup> Royal School of Veterinary studies, University of Edinburgh, Edinburgh, UK

<sup>6</sup> Comisión Nacional de Control de la Resistencia Antimicrobiana, Buenos Aires, Argentina.

<sup>7</sup> Independent researcher, Buenos Aires, Argentina.

<sup>†</sup> Full list of authors provided at the end of the manuscript

\* Corresponding author: e.pitchforth@exeter.ac.uk. University of Exeter Medical School, University of Exeter, Exeter EX1 2LU, UK.



## ABSTRACT

**Introduction.** Gaps in antimicrobial resistance (AMR) surveillance and control, including implementation of national action plans (NAP), are evident internationally. Countries' capacity to translate political commitment into action is crucial to cope with AMR at the human-animal-environment interface.

**Methods.** We employed a two-stage process to understand opportunities and challenges related to AMR surveillance and control at the human-animal interface in Argentina. First, we compiled the central AMR policies locally and mapped vital stakeholders around the NAP and the national commission against bacterial resistance. Second, we conducted qualitative interviews using a semi-structured questionnaire covering stakeholders' understanding and progress towards AMR and NAP. We employed a mixed deductive-inductive approach and used the constant comparative analysis method. We created categories and themes to cluster sub-themes and determined crucial relationships among thematic groups.

**Results.** Crucial AMR policy developments have been made since 1969, including gradually banning colistin in food-producing animals. In 2023, a new government decree prioritises AMR following the 2015 NAP launch. Our qualitative analyses identified seven major themes for tackling AMR: (I) Cultural factors and socio-political country context hampering AMR progress, (II) Fragmented governance, (III) Antibiotic access and use (IV) AMR knowledge and awareness throughout stakeholders, (V) AMR surveillance, (VI) NAP efforts, and (VII) External drivers. We identified a fragmented structure of the food production chain, poor cross-coordination between stakeholders, limited surveillance and regulation among food-producing animals, and geographical disparities over access, diagnosis and treatment. The country is moving to integrate animal and food production into its surveillance system, with most hospitals experienced in monitoring AMR through antimicrobial stewardship programs.

**Conclusion.** AMR accountability should involve underpinning collaboration at different NAP implementation levels and providing adequate resources to safeguard long-term sustainability. Incorporating a multisectoral context-specific approach relying upon different One Health domains is crucial to strengthening local AMR surveillance.

**Keywords:** Antimicrobial resistance, antibiotic use, Argentina, one health, low-and-middle income countries

### Strengths and Limitations

► Organisational barriers within stakeholder groups and the wider community—including the complexity of cross-sectoral communication, data access and interpreting information, fragmented routes for collaboration, and population awareness— have resulted in challenges towards establishing better AMR control and surveillance in Argentina

► AMR surveillance and control in food-producing animals outlines puzzled strings; there are limited antimicrobial stewardship programs and highly disintegrated food-production chains among meat production, specifically cattle.

► Potential beneficial opportunities presented, include using agricultural products (e.g., tannins) as an antibiotic replacement and the new law on AMR as an established government priority, should be fostered and capitalised for improvement towards AMR policy.

► The main limitations of our study are that the extent of interviewees' actual involvement in AMR policies differed, and that the generalisability of results might not apply to less represented sectors, such as the private industry.

## 1 Introduction

Antimicrobial resistance (AMR) represents a global public health threat driven by interrelated human, animal and environmental factors and requires multidisciplinary and cross-government action (1-3). National and international endeavours have collectively helped reduce AMR over recent years (4). The World Health Organisation (WHO) launched the Global Action Plan on AMR in 2015, soliciting countries to elaborate a National Action Plan (NAP) to confront AMR (5). Similar initiatives have come through the United Nations (UN)(6) and the European Commission (7) to develop multisectoral strategies involving human and animal health to fortify innovation stages and shape the global health agenda towards AMR NAPs. Despite 152 countries having published NAPs (8), challenges exist in implementing NAPs locally, limiting the progress towards addressing AMR (9). Contrasting cultures, policies, incentives and behaviours of relevant sectors and stakeholders have made the implementation of NAPs an arduous process (4). For instance, the lack of surveillance and epidemiological data, the variety of methods used to collect data and the limited understanding of the clinical and social burden of AMR pose challenges for the consummation of NAPs internationally (10). Locally, policy design, including governance and stakeholder involvement and cross-sectoral coordination, are critical to fulfilling the NAP's objectives while adapting the alternating demands of each local subgroup (4, 11).

Recent literature suggests that low- and middle-income countries (LMICs) are likely to face the most significant challenges in NAP implementation (4, 12-20). Among LMICs in Asia, a review found that accountability—a sense of ownership of organisations or people requiring responsibility to other stakeholders—has been omitted in most NAPs (4). Indications of unmet goals and lack of clarity in the stakeholders' role remain significant obstacles to AMR prevention and control (14, 15, 18). In the Americas, 29 countries (89%) have reported developing NAPs to combat AMR since the beginning of 2020 (21). However, most countries including Argentina, have not focussed sufficiently yet on One Health components; active surveillance of human health is not integrated with surveillance in animals or the environment (4, 18). Using a One Health approach is critical for effective NAP implementation because it optimizes the health of different sectors, including natural environments which play a crucial role in AMR evolution and transmission, while preventing zoonotic diseases and improving food safety and security. Argentina implemented a multisectoral NAP strategy in 2015 (22), and progress has been made, including the prohibition of colistin usage in 2019 and gradual banning of antibiotics as growth promoters among livestock (23, 24). A recent study measuring global response to AMR by employing a governance framework on NAP contents highlighted that Argentina can make improvements in standards to control AMR (18). The study stated Argentina's moderate efforts towards monitoring and evaluating AMR in humans and animals and modest AMR policy design (i.e., lack of accountability). However, the study used the Tripartite Antimicrobial Resistance Country Self-Assessment (TrACSS) survey, which could be influenced by the exclusion of publicly and privately accessible documents relevant for AMR monitoring locally, and it lacked data sources that could invite heterogeneity (e.g., interviews with multiple experts/ stakeholders), all of which are considerably important in LMICs. A more direct way to explore Argentine's response to AMR policy is to obtain current data from the stakeholders involved.

This study aims to better understand the stakeholder and regulatory landscape and the challenges and opportunities Argentina faces in implementing its NAP. We examined Argentina's case because it is one of the first countries to have a NAP and has a vast experience in AMR surveillance in the human sphere, which might indicate a good model for the Latin American region. We use the One Health (25) approach to assess policy priorities in action plans, and the governance framework (26) to evaluate interrelated dynamics between the One Health actors to improve critical areas: policy design, implementation tools, and monitoring and evaluation. The need to provide technical and financial support for implementing One-Health integrated NAPs has been recognised globally through the AMR Multi-Partner Trust Fund. Still, the donor base for this remains a few countries (27, 28). Global action may be based on shared goals, but there is a further need to understand the needs and priorities enabling or hindering those actions at national levels. We explore Argentina as a case-study to understand the complex landscape.

## 2 Methods

### 2.1 Study aims and setting

This article draws on literature and qualitative interview data from a study conducted in Argentina between September 2022 and February 2023. Argentina is an upper-middle income country that is endowed with highly fertile soils and great potential for renewable energy (hydroelectric, wind and solar energy) (29). It is a major food-producing country with an extensive agriculture and livestock industry; however, the country faces a high fiscal deficit with poverty and inflation rates of about 39% and 94.8% in 2022, respectively. The project's scope was to comprehend the context of AMR policy locally and among relevant stakeholders towards AMR control

and surveillance, focusing on food-producing animals. Relevant stakeholders included government (those with political/administrative duties and those having scientific-technical functions), academic, international, NGOs, and private (chamber of producers, commercial laboratories and producers) institutions.

### Study design

We divided our study into two stages. First, we explored the legal framework within the AMR NAP scope and mapped vital organisations, particularly related to food-producing animals (i.e., cattle, chicken and pigs). We searched the literature, including government documents, academic articles, stakeholder's websites, and grey literature, to capture the most relevant AMR policies and critical actors and their role over time. Most sources were identified from the website of the National Commission for AMR control (CoNaCRA, "*Comisión Nacional de Control de la Resistencia Antimicrobiana*") (30) the National Institute of Infectious Diseases (INEI) (31), and government website for national laws (<http://www.infoleg.gob.ar/>). A recent systematic literature review was also utilised to support evidence synthesis and mapping (32). Moreover, expert knowledge was consulted for main organisations related to the AMR NAP and food-producing animals, and their interactions with stakeholders. Second, after identifying and mapping relevant stakeholders, we conducted qualitative semi-structured interviews between September 2022 and January 2023 to gather information on stakeholder's views and experiences of NAP implementation, the role of different organisations and nature of coordination and decision making between organisations. Interviews were held in person or online lasting 45 to 90 minutes and were conducted by a bi-lingual (English-Spanish) social scientist. The stakeholder mapping developed in stage 1 was used to inform recruitment. A range of participants were sought from government, private and academic organisations. Potential participants were sent a formal request letter via email inviting them to take part in the interview study. Semi-structured interviews were performed using an interview topic guide designed to explore five main items, with questions and objectives detailed below (Box 1). Stakeholders were encouraged to discuss their own views openly. After obtaining informed consent, interviews were audio-recorded in Spanish and transcribed and translated to produce English and Spanish transcripts. Transcripts were checked for accuracy by the interviewer and anonymised. Translation bias was minimised by analysing both original and translated versions by Spanish native speakers (i.e., KA and a qualified third-party translator from Argentina). Back-translation was performed with a reduced sample (20%) of interviews to validate the accuracy of the initial translation (no discrepancies were found). Special attention was given to cultural references, idiomatic expressions, and regional dialects to ensure that translations were contextually appropriate and culturally sensitive (33). The consent form, participant information sheet, and participants interview topic guide are included in the online supplementary material.

#### Box 1. Interview's main sections including objectives, items and questions

**I. Participant's current role.** These questions seek to understand what experiences our participants have and how they might be relevant to implementing the NAP to combat AMR.

<1> What your job/role is, and what tasks do you and your organisation mainly perform?

<2> What are your (or department/organisation) interests and responsibilities concerning AMR?

**II. Understanding AMR among stakeholders.** This group of questions aim to understand employees' and organisations' views on AMR; its main drivers, change overtime, and priority areas within organisations to help tackle AMR.

<1> How do you feel (or what are your personal and department's concerns) about antimicrobial resistance in humans? Does that differ from antimicrobial-resistance in animals or any other source, including the environment (how)?

<2> Do you think the view about antimicrobial-resistance has changed over the years? How?

<3> What are the priority areas within your organisation to increase AMR awareness and to comply with the NAP? Do you feel your organisation helps to contribute to any of the areas detailed in the national plan (how, which)?

<4> What are the cornerstones for increasing AMR awareness while complying with the NAP within your organisation?

<5> Which cornerstones do you feel are most relevant within your department (organisation)? Why?

113 **III. Information channels and flow within stakeholders/departments.** These questions attempt to improve  
 114 organisations decision making towards better AMR surveillance by identifying how the information is  
 115 channelled within and between organisations.

116 <1>How do you feel about AMR-related information and communication flow within your organisation and  
 117 among all stakeholders?

118 <2> What do you think about communicational interactions, networking, and educational or getting-to-know  
 119 instances between your organisation and other stakeholders and within departments of your organisation?  
 120 Would you believe (and how) that the information pathways vary between specific organisation's  
 121 fields/disciplines, public/private institutions, or certain other groups?

122 <3> Could you identify which organisms (organisations), and how, are involved in your organisation's decision  
 123 making and strategy towards improving AMR surveillance and control?

124 **IV. Challenges in the implementation of the national action plan.** These questions attempt to answer what  
 125 factors or challenges might be key to increasing AMR awareness and improving AMR surveillance in food-  
 126 producing animals and agriculture.

127 <1> Do you feel there is any challenge that your organisation faces in complying with the AMR NAP and  
 128 helping contribute to better animal AMR surveillance? (Political priorities, monetary and non-monetary  
 129 resources, communication, etc) What are the most important and what can be done to overcome these challenges  
 130 if your organisation could prioritise resources to contribute more to AMR surveillance in animals?

131 <2> Who else do you think has a critical role in helping with AMR surveillance in animals from the pool of  
 132 stakeholders?

133 **V. Future and other considerations.** These questions aim to understand future steps to be taken within the  
 134 industry and different key members to tackle AMR.

135 <1> How organisations might be helped to enhance cross-sectoral communication and teamwork? How can we  
 136 ensure organisations make progress and collaborate to meet NAP criteria?

137 <2> Which organisations, at the national and international levels, do you think are most important to talk to and  
 138 direct efforts to address AMR knowledge gaps? Does the list differ from that necessary to improve the NAP?

139 <3> Is there anything else important that you might want to share with us or that we are missing in the current  
 140 interview?

### 141 **Data analyses**

142 First, we systematically organised Argentina's main AMR regulations using a timeline frame and drew a map to  
 143 delineate the main stakeholders directly or indirectly supporting the CoNaCRA directed by the Coordination on  
 144 appropriate use of antimicrobials of the ministry of health, as the commission articulating the efforts for the  
 145 implementation of the NAP. Second, we employed a systematic qualitative thematic analysis of the interviews  
 146 using a mixed deductive-inductive approach (34); deductive because it was guided by interview questions from  
 147 a general topic to a more specific, but inductive as we draw data-driven conclusions derived from bottom-up  
 148 reasoning. We followed the constant comparative method (35) to favour participants' comparability.  
 149 Information and open data were classified into themes and subgroups using a coding scheme. Two investigators  
 150 independently recorded the interviews (KA, EP) using Dedoose software (V.8.0.35, Los Angeles, California:  
 151 Socio Cultural Research Consultants, LLC). Researchers frequently met to reconcile differences in code  
 152 application and distinguish new themes emerging from the data analyses. After consolidating new themes, all  
 153 interviews were re-coded using an updated scheme (see online supplementary material). Subsequently, we  
 154 identified interconnections between theme data to ascertain larger categories into which themes were clustered.  
 155 For quotations, we report descriptive characteristics, such as organisation type (academia, government, private,  
 156 production system), sex at birth, and assigned a random number to each interviewee. Quotes are reported in the  
 157 text and Tables as "Q" followed by ordered numbers. We reported descriptive statistics to facilitate reader's  
 158 understandability from whom quotations were drawn and favour studies' transparency while maintaining the  
 159 anonymity of participants. We utilised the consolidated Criteria for Reporting Qualitative Research (COREQ)  
 160 checklist to guide reporting of findings (36).

### 163 **Patient and public involvement**

164 This study was focused on the views and experiences of professionals. Patient and public involvement was  
 165 therefore not included but we ensured engagement with the community of interest. Public health experts from

166 Argentina and the UK contributed feedback on our study design and research questions, ensuring relevance and  
167 applicability across diverse settings without direct involvement in the core research process.

## 168 Results

### 169 I. First stage: review of policies and mapping key stakeholders

170 The timeline containing established laws and regulations related to AMR is found in Supplementary material  
171 section I. Briefly, antimicrobial regulation started in the early 60's with the first law of medications and  
172 enforced prescriptions for antibiotic acquisition. In 2007-9, new decrees were introduced instituting required  
173 prescription for antibiotic sale and compliance for dispensation of medicines, including the registration book of  
174 veterinary medicines usage in food-producing animals (2009-11, decree number 26514). In 2013, Argentina's  
175 national Food Safety and Quality Service (SENASA) created the traceability system for veterinary medicines,  
176 which links sellers and purchasers where entities take full responsibility for antibiotic possession.  
177 Consecutively, Argentina's national commission for the control of AMR (CoNaCRA) was established and led  
178 the launch of the NAP in 2015 (see Supplementary material section II for a summary). This was concurrent with  
179 the abolition of antibiotic usage as an animal growth promoter (2015). The national law towards gradual  
180 prohibition of colistin usage in any form/ingredient took place in 2019. Recently, there was a new law  
181 encompassing an One health AMR agenda in the future (decree number 27680) aiming to foster and promote  
182 AMR control, prevention, research, regulation, and awareness (24).  
183 Finally, Figure 1 shows the mapping of key AMR surveillance and control stakeholders. We organised it  
184 starting from the CoNaCRA as the commission responsible for the implementation of the NAP and those  
185 relevant organisations surrounding them (main governmental divisions in brown boxes).  
186

### 187 II. Second stage: qualitative analyses

#### 188 Descriptive characteristics of study participants

189 We approached 27 individuals initially (non-response levels=33%), but our final sample consisted of 18  
190 participants (six women, 33%) mostly based in Buenos Aires city (88%) and from diverse institutions including  
191 government (N=9), academia (N=3), private (N=2), NGOs (3) and international organisations (N=1).  
192

#### 193 Thematic categories and codes

194 Barriers, opportunities, and state-of-art information contributing to human and food-producing animal AMR  
195 were clustered into seven thematic categories organised by specificity level (from less and more specific themes  
196 towards AMR policy). Themes were established based upon number of mentions and repetitiveness. Two  
197 themes emerged from Argentina's embedded values and political context impacting AMR indirectly: (I)  
198 Cultural factors and country context and (II) Governance. Four themes were directly associated with AMR: (III)  
199 Antibiotic access and use, (IV) AMR knowledge and awareness, (V) AMR surveillance, (VI) National action  
200 plan efforts. The remaining theme was linked to external factors indirectly affecting all chain's decision-making:  
201 (VII) External drivers. The full definition of themes —ordered from less to more specific except for external  
202 drivers, which affects them all— with their respective sub-themes, are shown in Table 1.  
203

#### 204 Theme I. Cultural factors and socio-political country context

205 This category involved country characteristics that determine the response to AMR. Interviewees described that  
206 country's economic and political shifts, including goods shortages and high inflation rates, had jeopardised the  
207 health system, bringing instability over time to AMR control. Most political decisions in a resource-constrained  
208 country were said to be difficult to manage but high reliance upon people and relationships was essential. For  
209 instance, a participant described frustration and uncertainty but ability to cope with challenges despite the  
210 economic circumstances.  
211

212 *“Argentina has 30 years of experience on AMR surveillance, we live economic shortages and political shifts*  
213 *fiercely in Argentina; a state of crisis, and we are somewhat used to this dynamic trying to cope with it as*  
214 *best we can. We have developed good coordinating links between teams centralised on good communication*  
215 *skills, but we cannot guarantee sustainability. It will depend on future leader's coordination since monetary*  
216 *resources are limited, a lot relies upon the projects or people's willingness to contribute but we believe it will*  
217 *perpetuate”*—Participant from a public institution (ID=9), female.

218 Most participants agreed that changing people's attitudes and behaviour, especially among food-producing  
219 animal producers, is challenging due to embedded values (Q1, Table 2). For instance, a participant described it  
220 as follows:

221 *“Inappropriate antibiotic use, driven by cultural norms like self-medication and seeking quick remedies is often*  
222 *influenced by limited healthcare access. This extends into food production, where profit motives can override caution.*  
223 *A shift in cultural perspective is crucial, educating on responsible use and the benefits of animal welfare and*  
224 *sustainable practices across the sectors”* —Participant, from a public institution (ID=6), male.  
225

226 *Theme II. Governance*

227 Participants reported constraints in the administration system that limited or enhanced their ability to perform  
 228 improvements towards tackling AMR. Most participants recognised that SENASA conducts extensive and well-  
 229 articulated labour; however, they emphasised the lack of auditing and accountability in decentralised  
 230 administrations (regions) in Argentina, which hampers AMR control due to the inherent variability in the quality  
 231 of care and health access (Q3, Table 2). Efforts to homogenise quality of care and access to antibiotics in  
 232 humans and animals are ongoing, but monetary and non-monetary resources are bounded (Q4, Table 2).  
 233 Although resources were finite, stakeholders' communication was often seen as a local strength and the  
 234 cornerstone of policy making. Good interpersonal relationships within the public, academic, NGOs and  
 235 international organisations were reported (Q5, Table 2). However, a demand for more integrated services and  
 236 decision-making was stated (Q5), translating into the need to foster horizontal information flows with mutually  
 237 integrated systems and organisations throughout the country (Q6, Table 2).

238  
 239 Regarding the regulation sub-theme, there are positive views towards the new law on antimicrobial use, despite  
 240 the former law introducing some restrictions but lacking control on usage, prescribing and storage (most  
 241 frequent among animals) (Q7, Table 2). On top of all previously discussed factors, the political context and  
 242 agenda were considered critical for AMR control but conflicting depending on the country's obstacles and  
 243 people in charge (Q8, Table 2).

244 **Table 1.** Main themes, definitions and sub-themes identified from the interview analysis (N=18 people)

| Themes <sup>†</sup>                                            | Definitions                                                                                                                                                                                                                                                                                  | Sub-Themes                                                                                                                                                              | N of times mentioned*                              |
|----------------------------------------------------------------|----------------------------------------------------------------------------------------------------------------------------------------------------------------------------------------------------------------------------------------------------------------------------------------------|-------------------------------------------------------------------------------------------------------------------------------------------------------------------------|----------------------------------------------------|
| <b>I. Cultural factors and socio-political country context</b> | Understanding the importance of cultural, country context, including personal relationships                                                                                                                                                                                                  | [1]Cultural features<br>[2]National context and sociodemographic characteristics                                                                                        | [1]21<br>[2]18                                     |
| <b>II. Governance</b>                                          | Government attributes related to political priorities, federalisation, nature of institutions/groups, accountability, human and economic/budgetary resource available, data systems and capacity, importance of changing political will, regulations and communication between stakeholders. | [1]System governance<br>[2]Resources<br>[3]Stakeholder communication<br>[4]Information and data flow<br>[5]Regulation and compliance<br>[6]Political context and agenda | [1]23<br>[2]22<br>[3]39<br>[4]39<br>[5]38<br>[6]11 |
| <b>III. Antibiotic access and use</b>                          | Referring to antibiotic consumption and access, prescriptions control and alternatives being developed among animals and humans.                                                                                                                                                             | [1]Antibiotic access<br>[2]Antibiotic consumption<br>[3]Antibiotic regulations including prescriptions.<br>[4]Alternatives to antibiotics                               | [1]15<br>[2]11<br>[3]14<br>[4]9                    |
| <b>IV. AMR knowledge and awareness</b>                         | Related to public and professional awareness – the challenge of awareness and steps taken to address it including seminars, conferences, courses, stewardship programs, advertising campaigns using mass media, etc.                                                                         | [1]Challenges related to public and professional awareness.<br>[2]Existing training and learning opportunities                                                          | [1]41<br>[2]15                                     |
| <b>V. AMR surveillance</b>                                     | Perceived progress and challenges, inclusive of AMR surveillance. Reference to food production markets including differences by animal species                                                                                                                                               | [1]AMR surveillance<br>[2]Food production systems and specific surveillance<br>[3]Veterinary sector, agent of change                                                    | [1]34<br>[2]35<br>[3]14                            |

|                                        |                                                                                                                                                                                         |                                                                   |                |
|----------------------------------------|-----------------------------------------------------------------------------------------------------------------------------------------------------------------------------------------|-------------------------------------------------------------------|----------------|
|                                        | and the role of the veterinary sector on AMR surveillance.                                                                                                                              |                                                                   |                |
| VI. National action plan (NAP) efforts | Implementation of NAP and professional roles, including views on progress over time                                                                                                     | [1]NAP progress including challenges, barriers, and opportunities | [1]22          |
| VII. External drivers                  | Referring to external factors contributing to the acceleration of AMR, potential opportunities, and good practice, including international actors and role in/influence on national AMR | [1]Context of COVID-19<br>[2]International actors and policies    | [1]16<br>[2]12 |

Notes: AMR= Antimicrobial resistance. †Themes are ordered from less to more specific levels (except for external drivers which affects them all), see Figure SM2, Supplementary material, for visual hierarchy. \*Codes can be mentioned more than once per interview.

**Table 2.** Quote examples by themes and sub-themes and identification of challenges and opportunities

| Themes <sup>†</sup>                                     | Sub-theme | Representative quote examples                                                                                                                                                                                                                                                                                                                                                                                                                                                                                                                                                                                                                     | Challenge/opportunity     |
|---------------------------------------------------------|-----------|---------------------------------------------------------------------------------------------------------------------------------------------------------------------------------------------------------------------------------------------------------------------------------------------------------------------------------------------------------------------------------------------------------------------------------------------------------------------------------------------------------------------------------------------------------------------------------------------------------------------------------------------------|---------------------------|
| I. Cultural factors and socio-political country context | [1]       | Q1: “AMR is a cross-cutting issue, but with older-generation low-educated producers living mostly in remote areas (a large quantity), it has been difficult to make them switch their mindset and understand that antibiotics are not necessary for food production, if no bacterial disease is present, and that antibiotic misuse and AMR affect humans and animal well-being.”—Veterinary, public institution(ID=3), male.                                                                                                                                                                                                                     | Challenge                 |
|                                                         | [2]       | Q2: “Today, in Argentina, we have 52% poverty and talking about AMR is challenging, considering that 95% of the population is deprived. Telling people to buy cage- and antibiotic-free eggs for a double price seem problematic, considering that overcrowding, hunger, and lack of sewers are constant daily challenges” —Participant from an NGO (ID=13), male.                                                                                                                                                                                                                                                                                | Challenge                 |
| II. Governance                                          | [1]       | Q3: “SENASA is very dynamic but there is lack of accountability from each participating institution when combatting AMR. It is worrisome that SENASA’s and other public organisation’s labours are highly centralised in the capital, because there is a high heterogeneity in access to treatment, diagnosis, quality standards for animal products, and antibiotic prescribing throughout the country. We know SENASA, for instance, is impeccable but our surveillance system is not punitive, whereas it mostly teaches producers as we do not know where those AMR pathogens came from (reservoirs)” —Participant from an NGO (ID=12), male. | Challenge and opportunity |
|                                                         | [2]       | Q4: “I think that the most important difficulty is economic and human resources, because especially in public institutions, it is challenging for people to have exclusive and fully compensated dedication” —Participant from a public institution (ID=11), female.                                                                                                                                                                                                                                                                                                                                                                              | Challenge                 |
|                                                         | [3]       | Q5: “We have solid communication channels between governmental institutions (SENASA, INTA, MALBRAN, CoNaCRA) and somewhat with international and academic institutions, but we should employ a strategy of involvement between technical scientific groups, hospital and veterinary leaders, the private industry, including pharmaceutical, and meat producers and related organisations. We need to tell them what our problem is, for them to tell us theirs, and finally come up with integrative solutions that are beneficial for all parties.” —Participant, from a public institution (ID=6), male.                                       | Challenge and opportunity |
|                                                         | [4]       | Q6: “For some diagnostics we report directly to the health informatics system, but we lack perhaps of articulating all the information flows more horizontally facilitating access above all the political decision-makers. Additionally, most systems are not integrated” —Participant from a                                                                                                                                                                                                                                                                                                                                                    |                           |

|                                 |     |                                                                                                                                                                                                                                                                                                                                                                                                                                                                                                                                                                                                                                                                                                                                                                                                                                                                                                                                              |                           |
|---------------------------------|-----|----------------------------------------------------------------------------------------------------------------------------------------------------------------------------------------------------------------------------------------------------------------------------------------------------------------------------------------------------------------------------------------------------------------------------------------------------------------------------------------------------------------------------------------------------------------------------------------------------------------------------------------------------------------------------------------------------------------------------------------------------------------------------------------------------------------------------------------------------------------------------------------------------------------------------------------------|---------------------------|
|                                 |     | public institution (ID=11), female.                                                                                                                                                                                                                                                                                                                                                                                                                                                                                                                                                                                                                                                                                                                                                                                                                                                                                                          | Challenge and opportunity |
|                                 | [5] | Q7: “Our legislation should regulate and control sales and consumption of antibiotics, including misuse (prohibition, e.g., colistin in veterinary in 2017). Now, it is approved the Antimicrobial Use Law, which legislates on the request of archived prescriptions, and it is stricter than the former law (only monitored required prescriptions and it had poor compliance). We believe antibiotic consumption might decrease. However, regulations are not yet standardised across country regions organically and the informal market is ample.” —Participant from a public institution (ID=6), male.                                                                                                                                                                                                                                                                                                                                 | Challenge and opportunity |
|                                 | [6] | Q8: “At the ministerial level, sometimes AMR does not receive the importance and continuity it requires. Today we have a Minister of Health to whom AMR was a priority on their political agenda and most policy attempts entails, and do not omit, reducing AMR and antibiotic misuse. It is helpful to work in favour of that, but it is not frequently the case.” —Participant from an international institution (ID=17), female.                                                                                                                                                                                                                                                                                                                                                                                                                                                                                                         | Challenge and opportunity |
| III. Antibiotics access and use | [1] | Q9: “Laboratories distribute veterinary products. Laboratories have the approval of SENASA to produce and commercialise the products, as well as the distributors. The commercialisation path is laboratory> distributor> production, through veterinarians, but sometimes is the owner himself selling and applying them due to lack of regulation on access, even over the counter. Among cattle, there is a large part of the production that is still extensive and pharmaceutical companies are often far away from feedlot farms. Hence, they keep first-aid kits, including antibiotics, which are applied to wounds or with no diagnostic or under no veterinary supervision. The law obliges establishments to have a treatment book where animal treatments and antibiotics used are recorded, but in most remote areas is not reliably fulfilled and control is limited” —Participant from an NGO linked to animals (ID=4), male. | Challenge                 |
|                                 | [2] | Q10: “I work in swine production; our main concern relies upon prophylactic consumption of the antibiotic. Indiscriminate antibiotic consumption is present in two ways within swine production. First, metaphylactic, when there is a percentage of animals that are indeed sick within the flock, but since they are living with them, it is very likely that others are incubating the disease, hence they are treated. The second is the prophylactic, where there is no sick animal, but there are factors of potential stressors that could make those animals sick. This is our biggest concern, because antibiotic is then incorporated into food, whose biological matrix restricts bioavailability of the active ingredient. Additionally, when antibiotics are applied, withdrawal times are not monitored, which promotes the development of AMR mechanisms further” —Veterinarian, academia (ID=14), male.                      | Challenge                 |
|                                 | [3] | Q11: “Laboratories producing medicines for veterinary use must comply with good manufacturing practice ‘GMP’ standards. They register the product, present all the documentation on waste, among other features. We have traceability in some products, such as ketamine, each bottle is identified and we follow-up until the final user. Laboratory production of medicines is well monitored, but there are limited regulations over usage registration, because products are not often administered by health professionals. For instance, final users do not necessarily respect the restriction period or animal treatment is incomplete, for which regulation is scarce.” —Participant from an NGO (ID=4), male.                                                                                                                                                                                                                      | Challenge                 |
|                                 | [4] | Q12: “We employ tannins, organic acids, probiotics, and prebiotics instead of antibiotics. We proved their efficacy for <i>Escherichia coli</i> and <i>Salmonella</i> using a mixture of probiotics and prebiotics in sentinel farms, which were boosted animal growth. We have produced alternative to antibiotics for a long-time including animal vaccines against pneumonia, and it was company’s initiative.” —Participant from a private company (ID=5), male.                                                                                                                                                                                                                                                                                                                                                                                                                                                                         | Opportunity               |



|                                        |     |                                                                                                                                                                                                                                                                                                                                                                                                                                                                                                                                                                                                                                                                                                                                                                                                                                                                                                                                                                                                                                                                                                                                                                                                                                                                                                                                                                                                                                    |                           |
|----------------------------------------|-----|------------------------------------------------------------------------------------------------------------------------------------------------------------------------------------------------------------------------------------------------------------------------------------------------------------------------------------------------------------------------------------------------------------------------------------------------------------------------------------------------------------------------------------------------------------------------------------------------------------------------------------------------------------------------------------------------------------------------------------------------------------------------------------------------------------------------------------------------------------------------------------------------------------------------------------------------------------------------------------------------------------------------------------------------------------------------------------------------------------------------------------------------------------------------------------------------------------------------------------------------------------------------------------------------------------------------------------------------------------------------------------------------------------------------------------|---------------------------|
| IV. AMR knowledge and awareness        | [1] | Q13: <i>“One of the main challenges is the access to information/ communication, the awareness of responsible antibiotic use, and lack of commitment from the private sector. Technical and general education on antibiotics and AMR should be promoted to help set a change of consciousness in the consumer, prescriber, and sellers by letting them know the actual effects/impacts of AMR on population health and animal businesses (among producers). The profitability of the sector is compromised if producers are not willing to pay a differential for meat production that could produce higher costs in the future if not committed.”</i> —Engineer from an NGO (ID=7), male.                                                                                                                                                                                                                                                                                                                                                                                                                                                                                                                                                                                                                                                                                                                                         | Challenge                 |
|                                        | [2] | Q14: <i>“The Argentine population is much more aware of what human health is and what antibiotics are designed for. For instance, we had the World Week of Awareness in November, and we held the AMR awareness race alongside the Ministry of Health and Sports, which exhibits interrelationships between different groups.”</i> —Participant from an international organisation (ID=17), female                                                                                                                                                                                                                                                                                                                                                                                                                                                                                                                                                                                                                                                                                                                                                                                                                                                                                                                                                                                                                                 | Challenge and opportunity |
| V. AMR surveillance                    | [1] | Q15: <i>“We created the infection surveillance program in 2004 for human hospitals, which is an essential part of national surveillance reporting the annual prevalence/incidence of most critical pathogens. A ministerial resolution from 2018 recommends establishing hospital prevention and control programs, but adherence is optional. We have more than 200 added institutions reporting the appropriate use of antimicrobials yearly, including whether it was empirical, directed, surgical prophylaxis, community-acquired infection, etc. In-hospital software, part of the National Antimicrobial Resistance Surveillance Network ‘WHONET’, clinicians load the data, compute the analyses (automatically) and feeds the information to the epidemiology department. However, since 2021 (ministerial resolution), prevention and control programs must be certified depending on international guidelines. We use a federal criterion to enrol national institutions and federal hospitals, but private organisations are poorly represented. Also, some institutions did not have stewardship programs actively functioning. We updated the last referendum to include antimicrobial stewardship as a section for infection control (2021), assigning importance to protected areas for infectious disease specialist and pharmacists within hospitals.”</i> —Participant from a public institution (ID=11), female | Challenge                 |
|                                        | [2] | Q16 <i>“We have two main problems. First, we detect and observe a lot of animal cases experiencing neonatal diarrhoea produced by multi-resistant E. coli, even encountering septicaemia, which presents a serious health problem. Secondly, we see multi-resistant bacterial strains more frequently associated with bovine’s respiratory complex. We identify bronchopneumonia or pneumonia as the two main infectious syndromes. We receive multiple samples from animal lungs, mainly originated in fattening animals in the pen or outbreaks of pneumonia. Quite predominantly, we observe the presence of bacterial resistance to a large majority of the antibiotics routinely used for treating respiratory conditions. That shows some inefficiency from fragmented production systems lacking vertical structure, reduced biosecurity, and poor vaccination rates, especially among cattle.”</i> —Veterinarian, public organisation (ID=8), male.                                                                                                                                                                                                                                                                                                                                                                                                                                                                        | Challenge                 |
|                                        | [3] | Q17: <i>“I do believe that veterinarians have a very important multisectoral role to play there as training and awareness agents to contain AMR burden.”</i> — Participant from an NGO (ID=4), male.                                                                                                                                                                                                                                                                                                                                                                                                                                                                                                                                                                                                                                                                                                                                                                                                                                                                                                                                                                                                                                                                                                                                                                                                                               | Opportunity               |
| VI. National action plan (NAP) efforts | [1] | Q18: <i>“Progress has been made if we compare it with five years ago. Regulations on the use of antibiotics to prevent their misuse, such as growth promoters, and vast existing (AMR control in animals) and new initiatives to start controlling AMR reservoirs in soil and water demonstrates we are working towards a better integrated system by taking</i>                                                                                                                                                                                                                                                                                                                                                                                                                                                                                                                                                                                                                                                                                                                                                                                                                                                                                                                                                                                                                                                                   | Opportunity               |

1  
2  
3  
4  
5  
6  
7  
8  
9  
10  
11  
12  
13  
14  
15  
16  
17  
18  
19  
20  
21  
22  
23  
24  
25  
26  
27  
28  
29  
30  
31  
32  
33  
34  
35  
36  
37  
38  
39  
40  
41  
42  
43  
44  
45  
46  
47  
48  
49  
50  
51  
52  
53  
54  
55  
56  
57  
58  
59  
60

into consideration the One Health approach”—Veterinarian, public organisation (ID=8), male.

**VII. External drivers**

- [1]\* Q19: “Something the pandemic left us was the effectiveness of virtual meetings, for example, plan out objectives and do training with the veterinarians and farm owners” —Participant from an NGO (ID=4), male. Opportunity
- [2] Q20: “We performed projects alongside the European Union, WHO and Centre for Disease Control, which supported Argentina through international funding to perform AMR surveillance and control, even in food products and wastewater.” —Participant from a public institution (ID=1), female. Opportunity

Notes: AMR= Antimicrobial resistance. † Sub-themes descriptions are found in Table 1. NGO= non-governmental organization. \*There are challenges associated as well, but we included an opportunity. CoNaCRA= National Commission for the Control of Antimicrobial Resistance. INE= National Institute of Epidemiology. INEI= National Institute of Infectious Diseases. INTA= National Agricultural Technology Institute. SENASA= National Service of Agri-food Health and Quality. WHO= World Health Organization.

*Theme III. Antibiotics*

Thematic III encompasses efforts to improve antibiotic access, consumption, and regulation, while accounting for potential alternatives. Access to antibiotics was indicated as better regulated in the human side, where hospitals and labs work collaboratively; however, a few participants expressed concerns about the applicability of mandatory prescriptions for sales and a mismatch between prescribed treatments and antibiotic package dosing:

“Antibiotics are still sold without a prescription either for human or animal use (more frequent among animals), even if prescriptions are mandatory by law, including keeping track of their usage by health professionals (electronic sales). Another issue is the dosage; antibiotics are usually sold in dosages greater than needed, which incentivises inappropriate utilisation maximising commercial interests.”— Participant, academia (ID=14), female.

In addition, one participant expressed worrying views towards antibiotic access and prophylactic use in animals and its relationship with AMR evolution, including reduced capacity for monitoring usage and withdrawal (Q10, Table 2). On the animal side, the route for antibiotic acquisition could have been more cohesive; vets do not necessarily monitor antibiotic purchase, application, and storage, and limited local regulations are in place (Q9, Table 2). Such practices can be reflected early in the regulation system and antibiotic dispensing from the first stage of the purchasing chain. Most medicines for veterinary use follow international manufacturing standards, but traceability of compounds and usage is restricted once purchase is made (Q11, Table 2). Finally, some participants working on antibiotic replacement produce alternatives for antibiotic use in food-producing animals. They were optimistic over vaccine production offering an efficacious alternative, tackling respiratory diseases in animals, and using additives and plant-based biomolecules to improve food conversion efficiency and eradicate antibiotic use as growth promoters in animal farms (Q12, Table 2).

*Theme IV. AMR knowledge and awareness*

Theme IV incorporated progress made towards AMR knowledge and awareness targeting different settings and communities. Participants were inclined to say that awareness has increased, and impacts on human health are acknowledged (Q13, Table 2), primarily among leading institutions including government, but awareness campaigns only have limited reach to the wider population, including meat producers, as they tend to be specific and attend professional needs:

“There is a problem with vets’ knowledge of antibiotics, specifically in terms of pharmacokinetic and pharmacodynamic aspects, the correct calculation of the dose administration. It is the duration of treatment in the form of clinical criteria and corresponding to specific physiological situations. All these aspects are related to rational antibiotic usage. If you forget these aspects, you can reach a therapeutic failure despite having chosen the correct antibiotic based on what the laboratory said; and this is largely prevalent in the country.”— Veterinarian, academia (ID=14), male.

Notwithstanding, participants reported initiatives to raise the human population’s awareness generally, including social events and educational seminars, having positive perceived conceptions from participants but their effectiveness remains unclear (Q14, Table 2).

*Theme V. AMR surveillance*

Theme V comprised all barriers or opportunities that made implementation of surveillance and AMR control overtime arduous or fruitful. Participants expressed that surveillance of AMR has exhibited a lot of progress overtime, especially among humans, and most recently in animals. Antibiotic stewardship and infection surveillance programs in humans, including the regular monitoring of a consolidated network of +200 hospitals, primarily public, are some of the positive views perceived by stakeholders towards implementation (Q15, Table

2). Antibiotic consumption control is a central priority of the government now and a countrywide program is being developed to strengthen AMR surveillance:

*“We have implemented a national surveillance system for the national consumption of antibiotics in humans, which we did not have until a short time ago. Now, it is time to access the information related to disaggregated statistics on antibiotic sales through collaboration with Pharmacology in human and animal side.”—Pharmacist, public organisation (ID=6), female*

However, policies around AMR surveillance and control are moving forward among livestock production systems but at slower rates. One participant indicated that testing for critical animal pathogens is routine and usually comes from public organisations. Still, animal diagnostics are difficult to access sometimes, and surveillance does not yet clearly account for different locations, species, and seasonal components:

*“INTA monitors some animal production chains, but surveillance is the primary task of SENASA, for example, in dairy, we evaluate animals experiencing a mastitis disease and track AMR and potential environmental reservoirs with technology developed locally. Another example, we detect Salmonella in animals and utilise microbiological analyses, including phenotyping and genotyping to analyse AMR and evolution, as part of surveillance routines hand by hand with SENASA. However, most surveillance comes from the governmental side, sampling seasonality is not often captured due to limited resources, the quantity of livestock farms is massively distributed throughout the country, and local producer’s veterinary diagnostics are often sent to private labs where traceability is missing.”—Veterinarian, public organisation (ID=15), male.*

Challenges identified by participants on AMR surveillance among animals are mirrored mainly in the animal industry, which constitutes many producers and actors through the production chain, making it complex to supervise (Figure 2 shows a brief description and example of cattle production based on interview content and additional sources for broader context). As reported by one participant, industry’s main challenges rely upon controlling early stages within the production chain, including improved hygiene and sanitation and vaccination strategies before animals are stressed while moving from breeding to fattening stages (Q16, Table 2).

#### *Theme VI. National action plan efforts*

All participants expressed a positive attitude towards progress made on the NAP even if it is slow. Participants agreed upon improvements, such as, the institutionalisation of CoNaCRA, recently launched law on established AMR network and surveillance (which does not depend on political will), new research centre (IMPAM) for environmental surveillance of AMR reservoirs including water, more control over companion and food-producing animals since 2015 from INTA and SENASA, and that prohibition of some antibiotics has been crucial (Q18, Table 2). Another participant highlighted its value as a premier platform for interdisciplinary engagement:

*“The NAP has significantly advanced and enhanced interdisciplinary and interdepartmental cooperation between animal and human health sectors, primarily driven by the CoNaCRA, which has facilitated knowledge sharing. However, the challenge of synchronising NAP initiatives across 24 distinct provinces in a federal system underscores the imperative for more effective inter- and intra-level cooperation—Participant from a public institution (ID=9), female.”*

#### *Theme VII. External drivers*

Theme VII comprises external factors, identified by participants, that have had a direct or indirect role affecting AMR control and surveillance. Most participants (60%) recognised that COVID-19 limited the progress of AMR control and policy due to reallocation of human, economic and other resources towards the pandemic response. For instance, one participant described it as follows:

*“Teams were absolutely overwhelmed during COVID-19, all the artillery was dedicated to diagnosis and containment of COVID. We observed an overuse of antimicrobials during these two years, which have accelerated the appearance of new AMR mechanisms and their transmissibility. At the microbiological level, pandemic lineages have appeared, which changes local epidemiology”—Infectious disease doctor, public organisation (ID=1), female.*

However, positive lessons were drawn from the pandemic, including the effectiveness of virtual meetings as an advantage of multisectoral collaboration (Q19, Table 2). Additionally, prioritisation of personal hygiene and care and hand washing was understood to be improved due to increasing awareness of communicable diseases and human health among citizens, as one participant reflected:

*“The pandemic has taught us, it’s to prioritize our personal hygiene. Hand washing and personal care help us not get sick from diseases, and if we don’t get sick, we do not require antibiotics.”—Veterinary, public organisation (ID=3), male.*

Finally, the second external factor relies upon international collaborations. Participants described solid relationships with international actors within the Americas and abroad, which has helped fund local projects for improving AMR control and surveillance (Q20, Table 2).

## **Discussion**

We employed a context and qualitative analysis to understand main gaps related to the progress of AMR control in implementing AMR policy and regulation in Argentina. Our findings revealed that overall stakeholders' perceptions towards AMR policy are positive, including development of personal relationships enabling progress, and that the NAP along with current emerging legislation are essential in formalising the first steps to a multisectoral and better integrated AMR surveillance system. Interviewees stated that main challenges on the way forward are related, but not limited to, commitment and accountability, monetary and non-monetary resources, cultural factors implying behaviour change, fragmented food-production systems, and global governance. We have summarised these below in Figure 3 in relation to whether at macro or micro level and short or long-term.

One of the most immediate short-term challenges identified by stakeholders was governance, which implied needing more accountability and resources through different AMR actors. Clearer administration systems for successful improvement and conveying AMR policies are crucial to moving forward in the AMR agenda (26, 38). Argentina's administration system is divided into provinces. Still, political decisions are highly centralised in the capital city, which hampers regulation of antibiotic access, AMR testing, and delivery of consistent access to healthcare and hospital infrastructure in humans and animals. Although the CoNaCRA has provincial representatives, the AMR agenda had limited alignment with subnational and local governments for NAP implementation posing significant challenges in rural and remote areas (39). Likewise in Brazil (20), these areas are often highly exposed to AMR risks due to health deprivation. Re-administering monetary and non-monetary resources to meet local needs and capacities and empowering provincial sentinel organisations are crucial to making AMR policies accountable.

Cross-sector coordination including animal, environmental and human sectors was highlighted as crucial by interviewees and constituted an essential element of short-term action towards tackling AMR and improve policy design. Although communication was perceived as positive due to interpersonal relations between colleagues, adequate governance must be established, including mechanisms to link organisations across sectors through formal channels to foster continuity. Effectively tackling these challenges is essential for the One Health approach, particularly given the COVID-19 pandemic's revelation of significant complexities and gaps in intersectoral collaboration, underscoring the need for integrated, human-uncentered, policies (40). Literature has focused on countries' need for better engagement and advocacy from various stakeholders (9, 14, 41). Governments, policymakers, and NGOs are essential to AMR control, supported by budgetary commitment and political authority to meet objectives (19). Current interventions in Argentina remain sector-specific, which could be attributed to differences in priorities for AMR or insufficiently well-defined roles in the NAP. Developing a monitoring or evaluation system for all implementation plans is recommended to determine policy effectiveness. Broad cross-field participation is also crucial if no public budget is allocated to address AMR nationally. Insufficient funding provided by the annual national budgets negatively impacts NAP implementation, generating more constraints on AMR action. The COVID-19 pandemic garnered global attention disrupting national resources and health services that were indirectly assigned to AMR control, and reallocating those funds has posed challenges to AMR reduction measures. One Health although theoretically a useful framework, was not considered in NAP implementation—it could have accounted for the co-benefits of addressing both risks concurrently. That is why the United Nations Environment Program (UNEP) established the Multi-partner Trust Fund (MPTF) to help LMICs improve delivery of multisectoral NAPs (28).

AMR awareness has increased overtime in Argentina. Recent efforts have included various seminars and activities, including a long-distance foot race to spread the word on AMR (42). However, AMR comprises stakeholders with diverse comprehension of the AMR phenomenon, and we evidenced a mismatch between scientific and non-scientific domains, including general public. Social change promoting human health via shifts in society's behaviour should be prioritised to ensure the sustainability of human development and their environments (43). For instance, public engagement is overlooked in Argentina's NAP. Strategies to evaluate attitudes, behaviours, necessities, and practices of socioeconomically and culturally diverging communities, drawing particular attention to those most vulnerable to AMR infections, are crucial to design public health interventions to combat AMR (4).

Strengthening AMR surveillance and control is vital, with different challenges depending on the species spectrum, as highlighted previously in LMICs (4, 19, 20, 44-46). In humans, laboratory surveillance has been based for decades on the connectivity of a well-established hospital networks (e.g., WHONET-Argentina (47)), which has helped monitor AMR locally with institutionalised IPC policies, led by the Antimicrobial Agents Division of INEI-ANLIS, the National and Regional Reference Laboratory for AMR, and the National Hospital Infection Surveillance Program (VIDHA), respectively. However, there are still gaps regarding the effectiveness of preserving antibiotics through stewardship programs, although consumption levels and inappropriate usage

1  
2  
3 423 rates decreased before COVID-19 (48). Yet, quality control among stewardship programs, antimicrobial sales  
4 424 with necessary prescriptions, and targeted local efforts in differing regions are still challenging throughout the  
5 425 country (49). In animals, the main surveillance challenges that were reported were concentrated around the  
6 426 unification of production systems (dispersed via multiple chains and actors potentially favouring the  
7 427 dissemination of AMR), whose current fragmented status hampers regulation, with differing control levels  
8 428 depending upon animal species. Systems' capacity to ensure prescription and consumption data is compromised  
9 429 and policies should coordinate and harmonise AMR surveillance while regulating the usage of antimicrobials in  
10 430 animal production at all production stages (32). Globally, antimicrobial stewardship by farm owners and health  
11 431 professionals (e.g., veterinarians) is relatively weak within agricultural systems; developing efforts towards  
12 432 stewardship programs in veterinary services, bolstering the veterinary role as a critical change agent, and  
13 433 companion animal practice remains crucial (50-52). Argentina's chambers of producers play an active role in  
14 434 agglomerating food producers and understanding their needs (e.g., Camara Argentina de Feedlots); their job  
15 435 should be directed towards better integration and prioritisation of educational services and improved production  
16 436 standards.

17 437  
18 438 A recent WHO report on integrated surveillance of AMR in foodborne diseases indicated that ineffective public  
19 439 health AMR surveillance systems often lack broader regulation and laboratory infrastructure, limited  
20 440 biosecurity, and inadequate data management capacity at government levels (53). We observed reduced capacity  
21 441 for data monitoring and sharing among animal stakeholders, whereby surveillance of antibiotic sales/usage and  
22 442 AMR rates by animal species could be better reported. Despite limited public control due to fragmentation of  
23 443 the production chain, food producers are perceived to prioritise profitability and local needs, regardless of the  
24 444 effects of AMR on population health. Moreover, creating an integrated One-Health approach combining animal  
25 445 and human systems, including environmental sources, might help reduce the AMR burden and prevent animal  
26 446 infections in farming communities (25, 54), ensuring sustainability over time and lowering the risks associated  
27 447 with political shifts and global uncertainties. The role of the private sector, not only restricted to food producers,  
28 448 in supporting AMR surveillance should be encouraged to provide a holistic whole-system integration, including  
29 449 a whole food-chain approach (55, 56). This should involve data access and optimising contemporary treatments  
30 450 and diagnostics through more research and technology to elucidate the transmission pathways of the most  
31 451 critical microorganisms for animal and human health.

32 452  
33 453 We identified potential opportunities that could help contribute to progressing action to reduce AMR locally.  
34 454 Most stakeholders favoured agricultural non-antimicrobial drug products as an antibiotic replacement for animal  
35 455 growth promoters. Using tannins and natural plant-based medicines could supersede antibiotics, reducing  
36 456 selective pressure and AMR burden (57, 58). Nevertheless, most of these products are difficult to access locally  
37 457 with limited legislation and high reliance on a few international companies. The provision of replacement routes  
38 458 from the government for antibiotic-free additives usage in animals, including appropriate stakeholder education  
39 459 and countrywide support through public pharmacies, is something the authorities should leverage. Furthermore,  
40 460 the new law establishing the AMR agenda as a constituted program, regardless of political change, presents  
41 461 substantial progress towards national recognition of the AMR problem (24). The initiative brings a long-term  
42 462 perspective to AMR policy, which could be used for the creation of an AMR policy database containing  
43 463 information on NAP implementation accountability and cross-species and environment AMR surveillance for  
44 464 policy advisors.

45 465  
46 466 Our study has some shortcomings. First, we were not able to speak to stakeholders from all areas of the  
47 467 stakeholder mapping and cannot generalise the views of participants to others but have confidence in the  
48 468 transferability of findings and common themes that arose among the diverse stakeholders who participated.  
49 469 Nevertheless, common themes arose from speaking to a range of stakeholders and our sample reached saturation  
50 470 with a narrow range of interviews, considered an appropriate sample size for qualitative research (59). Second,  
51 471 we could not represent private hospitals for human AMR, and differences between production chains, including  
52 472 a broader scope of animal species, dairy products, and final animal product providers, which remains a future  
53 473 study. Third, the extent of interviewees' actual involvement in AMR policies differed; however, we ensured  
54 474 respondents best authority through collaborative local work and expert knowledge. Fourth, the authorship group  
55 475 includes people involved in AMR policy in Argentina which could either favour (facilitate information flow) or  
56 476 bias (sampling, selection and confounding) our study results.

57 477  
58 478 Finally, participants' beliefs (interviews held between December 2022 and January 2023) might be subject to  
59 479 change in the forthcoming years due to implementation of the newly introduced national law on AMR  
60 480 prevention and control (August 2022) (24). Tighter measures regarding antibiotic usage and sales (only under-  
61 481 filled prescriptions) and promoting the One Health approach via implementing cross-sector policies while

1  
2  
3 482 accounting for organisation-specific responsibilities for their listed tasks are examples of the expected outcomes  
4 483 the law might enforce.

## 5 484 6 485 **CONCLUSION**

7 486  
8 487 Our study results draw attention to the main strengths, opportunities, and challenges in the process towards  
9 488 improved AMR awareness, control, and surveillance across the human-animal frontier in Argentina. The  
10 489 country has been one of the leaders in the region with an established AMR surveillance network for human  
11 490 health in the latest 40 years. However, AMR governance requires a multidisciplinary focus to help stakeholders  
12 491 at all levels deal with knowledge uncertainties and resulting differences in framing the AMR problem. We found  
13 492 critical areas that should be strengthened, including accountability, sustainable engagement, integrity and equity,  
14 493 socio-behavioural change, international cooperation, and consolidation of environmental and animal  
15 494 departments. Cross-cutting interventions incorporating these areas through different One Health domains should  
16 495 be accounted for if progressing towards AMR is noted. The recent law on AMR prevention and control serves as  
17 496 a good example, which identifies potential pathways to overcome challenges with direct implications for LMICs  
18 497 in the Latin American region.

19 498  
20 499 **Funding:** This research is co-funded by the UK Department of Health and Social Care as part of the Global  
21 500 AMR Innovation Fund (GAMRIF)(BB/T004452/1) and includes funding under the GAMRIF  
22 501 UK:Argentina AMR Pan-Programme Integration Project (PPIP). This is a UK aid programme that  
23 502 supports early-stage innovative research in underfunded areas of antimicrobial resistance (AMR) research and  
24 503 development for the benefit of those in low- and middle-income countries (LMICs), who bear the greatest  
25 504 burden of AMR. The views expressed in this publication are those of the author(s) and not necessarily those of  
26 505 the UK Department of Health and Social Care.

27 506  
28 507 **Role of the funding sources:** The funders had no role in the design, conduct, analysis or interpretation of the  
29 508 study.

30 509  
31 510 **Acknowledgments:** All authors attest they meet the ICMJE criteria for authorship and have reviewed and  
32 511 approved the final article. The authors are grateful to all participants for volunteering time as part of interviews  
33 512 and workshops.

34 513  
35 514 **Conflicts of Interest:** The authors declare no conflict of interests.

36 515  
37 516 **Author Contributions:** Conceptualization (KA, EP, WG, MF-M, AP); methodology (KA, EP, LBoden); formal  
38 517 analysis (KA); writing—original draft preparation (KA); writing—review, editing and commenting (KA, EP, WG,  
39 518 MF-M, AP, LBoden, LBarcelona, AC, FL); supervision (EP, MF-M, AP); securing funding for the project (RL,  
40 519 SG, SS-B, AP, MF-M, KR, HW, PD, DM, WG). All authors have read and approved the final version of the  
41 520 manuscript.

42 521  
43 522 **Data availability:** The qualitative data underlying this article are available in the article.

44 523  
45 524 **Ethics review:** Ethical approval was obtained from the Human Ethical Review Committee at University of  
46 525 Edinburgh (Ref: HERC\_696\_21, date of approval: 21April 2022).

### 47 526 48 527 **AMR policy research group Argentina:**

49 528 Rodolfo Luzbel de la Sota. *Facultad de Ciencias Veterinarias, Universidad Nacional de la Plata, Argentina.*  
50 529 Sonia Gómez. *Servicio Antimicrobianos, Instituto Nacional de Enfermedades Infecciosas, ANLIS “Dr Carlos G.*  
51 530 *Malbrán”, Buenos Aires, Argentina.*  
52 531 Sergio Sánchez Bruni. *Facultad de Ciencias Veterinarias, Universidad Nacional del Centro de la Provincia de*  
53 532 *Buenos Aires, Argentina.*  
54 533 Kristen Reyher. *Bristol Veterinary School, University of Bristol, UK.*  
55 534 Helen West Helen. *University of Nottingham, UK.*  
56 535 Peers Davies. *Institute of Infection, Veterinary and Ecological Sciences, Liverpool University, UK.*  
57 536 Dominic Moran. *The Royal (Dick) School of Veterinary Studies, University of Edinburgh, UK.*  
58 537

## 538 Abbreviations

539 AMR= Antimicrobial resistance  
 540 SENASA= Argentina's National Food Safety and Quality Service  
 541 ANLIS= Argentina's National Administration of Laboratories and Institutes of Health  
 542 CoNaCRA= Argentina's National Commission for the Control of Antimicrobial Resistance  
 543 INTA= Argentina's National Agricultural Technology Institute  
 544 IMPaM= Argentina's Institute for Research in Medical Microbiology and Parasitology  
 545 UBA= Universidad de Buenos Aires  
 546 INE= Argentina's National Institute of Epidemiology  
 547 INEI= Argentina's National Institute of Infectious Diseases  
 548 ANMAT= Argentina's National Administration of Drugs, Food and Medical Devices  
 549 CONICET= Argentina's National Scientific and Technical Research Council  
 550 FAO= Food and Agriculture Organization  
 551 WOA= World Organization of Animal Health  
 552 WHO= World Health Organization  
 553 PAHO= Pan American Health Organization  
 554 NAP= National Action Plan

555  
 556 **Figure 1.** Stakeholders within the human and food-producing animal interfaces for the implementation of the  
 557 NAP for the control of AMR in Argentina. Notes: Organisations abbreviations are provided in the abbreviations subtitle.  
 558 CoNaCRA= National Commission for the Control of Antimicrobial Resistance. All information on Government's ministries and structures  
 559 is available in <https://www.argentina.gob.ar/organismos>.

560  
 561 **Figure 2.** Brief description of some features within the cattle industry in Argentina. Notes: (A): Feed supplied in the  
 562 trough for cattle, livestock farm, Buenos Aires, Argentina. (B): Cattle pens, livestock farm, Buenos Aires, Argentina. (C):  
 563 Characteristics of beef production and relationship with AMR control. AMR= Antimicrobial resistance. NAP= National  
 564 action plan. Most information was derived from our interviews; exact quotes are shown upon request. References: (32, 37).

565  
 566 **Figure 3.** Major challenges and opportunities related to AMR policy in Argentina within a One Health scope in  
 567 the short and long-term. Notes: AMR= Antimicrobial resistance.

## 570 REFERENCES

- 571  
 572 1. Holmes AH, Moore LS, Sundsfjord A, Steinbakk M, Regmi S, Karkey A, et al. Understanding the  
 573 mechanisms and drivers of antimicrobial resistance. *The Lancet*. 2016;387(10014):176-87.  
 574 2. Murray CJ, Ikuta KS, Sharara F, Swetschinski L, Aguilar GR, Gray A, et al. Global burden of bacterial  
 575 antimicrobial resistance in 2019: a systematic analysis. *The Lancet*. 2022.  
 576 3. Allel K, Day L, Hamilton A, Lin L, Furuya-Kanamori L, Moore CE, et al. Global antimicrobial-  
 577 resistance drivers: an ecological country-level study at the human-animal interface. *The Lancet Planetary*  
 578 *Health*. 2023;7(4):e291-e303.  
 579 4. Charani E, Mendelson M, Pallett SJ, Ahmad R, Mpundu M, Mbamalu O, et al. An analysis of existing  
 580 national action plans for antimicrobial resistance—gaps and opportunities in strategies optimising antibiotic use  
 581 in human populations. *The Lancet Global Health*. 2023;11(3):e466-e74.  
 582 5. Mendelson M, Matsoso MP. The World Health Organization global action plan for antimicrobial  
 583 resistance. *SAMJ: South African Medical Journal*. 2015;105(5):325-.  
 584 6. Humphreys G, Fleck F. United Nations meeting on antimicrobial resistance. *World Health*  
 585 *Organization Bulletin of the World Health Organization*. 2016;94(9):638.  
 586 7. Commission E. A European one health action plan against antimicrobial resistance (AMR). European  
 587 Commission. 2017.  
 588 8. World Health Organization. Library of AMR national action plans 2023 [Available from:  
 589 [https://www.who.int/teams/surveillance-prevention-control-AMR/national-action-plan-monitoring-](https://www.who.int/teams/surveillance-prevention-control-AMR/national-action-plan-monitoring-evaluation/library-of-national-action-plans)  
 590 [evaluation/library-of-national-action-plans](https://www.who.int/teams/surveillance-prevention-control-AMR/national-action-plan-monitoring-evaluation/library-of-national-action-plans).  
 591 9. Frumence G, Mboera LE, Sindato C, Katale BZ, Kimera S, Metta E, et al. The governance and  
 592 implementation of the National Action Plan on Antimicrobial Resistance in Tanzania: a qualitative study.  
 593 *Antibiotics*. 2021;10(3):273.  
 594 10. Wernli D, Jørgensen PS, Harbarth S, Carroll SP, Laxminarayan R, Levrat N, et al. Antimicrobial  
 595 resistance: the complex challenge of measurement to inform policy and the public. *PLoS Medicine*.  
 596 2017;14(8):e1002378.

- 1  
2  
3 597 11. Organization WH. Monitoring and evaluation of the global action plan on antimicrobial resistance:  
4 598 framework and recommended indicators. 2019.  
5 599 12. Jimah T, Ogunseitan O. National Action Plan on Antimicrobial Resistance: stakeholder analysis of  
6 600 implementation in Ghana. *Journal of Global Health Reports*. 2020;4:e2020067.  
7 601 13. Khan MS, Durrance-Bagale A, Mateus A, Sultana Z, Hasan R, Hanefeld J. What are the barriers to  
8 602 implementing national antimicrobial resistance action plans? A novel mixed-methods policy analysis in  
9 603 Pakistan. *Health policy and planning*. 2020;35(8):973-82.  
10 604 14. Chua AQ, Verma M, Hsu LY, Legido-Quigley H. An analysis of national action plans on antimicrobial  
11 605 resistance in Southeast Asia using a governance framework approach. *The Lancet Regional Health-Western*  
12 606 *Pacific*. 2021;7:100084.  
13 607 15. Harant A. Assessing transparency and accountability of national action plans on antimicrobial  
14 608 resistance in 15 African countries. *Antimicrobial Resistance & Infection Control*. 2022;11(1):1-15.  
15 609 16. Nair M, Zeegers M, Varghese G, Burza S. India's National Action Plan on Antimicrobial Resistance: a  
16 610 critical perspective. *Journal of Global Antimicrobial Resistance*. 2021;27:236-8.  
17 611 17. Amin ET, Omeichu AA, Shu DM, Ekome SRE, Njumkeng C, van der Sande MAB. Control of  
18 612 antimicrobial resistance in Cameroon: Feasibility of implementing the National Action Plan. *Tropical Medicine*  
19 613 *& International Health*. 2021;26(10):1231-9.  
20 614 18. Patel J, Harant A, Fernandes G, Mwamelo AJ, Hein W, Dekker D, et al. Measuring the global response  
21 615 to antimicrobial resistance, 2020–21: a systematic governance analysis of 114 countries. *The Lancet Infectious*  
22 616 *Diseases*. 2023.  
23 617 19. Shabangu K, Essack SY, Duma SE. Barriers to Implementing National Action Plans on Antimicrobial  
24 618 Resistance using a One Health Approach: Policy-Makers' Perspectives from South Africa and Eswatini. *Journal*  
25 619 *of Global Antimicrobial Resistance*. 2023.  
26 620 20. Juliana Silva Corrêa LFZ, Roberto Rubem Da Silva-Brandão, Sandi Michele de Oliveira, Lislaine  
27 621 Aparecida Fracolli, Maria Clara Padoveze & Gloria Cordoba. The governance of antimicrobial resistance in  
28 622 Brazil: Challenges for developing and implementing a one health agenda. *Global Public Health*.  
29 623 2023;18(2190381).  
30 624 21. da Silva Jr JB, Espinal M, Ramón-Pardo P. Antimicrobial resistance: Time for action. *Revista*  
31 625 *Panamericana de Salud Pública*. 2020;44.  
32 626 22. Ministry of Health. National strategy for the Control of Antimicrobial resistance 2015 [Available from:  
33 627 <https://www.boletinoficial.gob.ar/pdf/linkQR/YzB6b2o4Qy9ZRDFycmZ0RFhoUThyQT09>.  
34 628 23. República Argentina - Poder Ejecutivo Nacional. Resolución 22/19. Productos veterinarios:  
35 629 prohibición de elaboración, distribución, importación, uso y tenencia 2019 [updated 11 January 2019. Available  
36 630 from:  
37 631 [http://www.senasa.gob.ar/sites/default/files/ARBOL\\_SENASA/INFORMACION/NORMATIVA/RESOL\\_Y\\_A](http://www.senasa.gob.ar/sites/default/files/ARBOL_SENASA/INFORMACION/NORMATIVA/RESOL_Y_A)  
38 632 [NEXOS/2019/r\\_senasa\\_22-2019.pdf](http://www.senasa.gob.ar/sites/default/files/ARBOL_SENASA/INFORMACION/NORMATIVA/RESOL_Y_A).  
39 633 24. Nacion ANCPdl. Boletín oficial de la republica de Argentina. Ley de prevención y control de la  
40 634 resistencia a los antimicrobianos, ley 27680. 2022 [updated August, 2022. Available from:  
41 635 [www.boletinoficial.gob.ar/detalleAviso/primera/270118/20220824?busqueda=1](http://www.boletinoficial.gob.ar/detalleAviso/primera/270118/20220824?busqueda=1) ).  
42 636 25. Ogyu A, Chan O, Littmann J, Pang HH, Lining X, Liu P, et al. National action to combat AMR: a One-  
43 637 Health approach to assess policy priorities in action plans. *BMJ global health*. 2020;5(7):e002427.  
44 638 26. Anderson M, Schulze K, Cassini A, Plachouras D, Mossialos E. A governance framework for  
45 639 development and assessment of national action plans on antimicrobial resistance. *The Lancet Infectious*  
46 640 *Diseases*. 2019;19(11):e371-e84.  
47 641 27. Pitchforth E, Smith E, Taylor J, Davies S, Ali G-C, d'Angelo C. Global action on antimicrobial  
48 642 resistance: lessons from the history of climate change and tobacco control policy. *BMJ Global Health*.  
49 643 2022;7(7):e009283.  
50 644 28. United Nations. Antimicrobial Resistance Multi-Partner Trust Fund  
51 645 Countering antimicrobial resistance with a 'One Health' approach 2022 [Available from:  
52 646 <https://mptf.undp.org/fund/amr00>.  
53 647 29. World Bank. World Bank Data 2023 [Available from: <https://data.worldbank.org/country/argentina>.  
54 648 30. Ministry of Health. Comisión Nacional de Control de la Resistencia Antimicrobiana (CoNaCRA) 2024  
55 649 [Available from: <https://www.argentina.gob.ar/salud/epidemiologiaysituacion/conacra>.  
56 650 31. Instituto Nacional de Enfermedades Infecciosas (INEI) – ANLIS “DR. CARLOS G. MALBRAN.  
57 651 Servicio Antimicrobianos 2024 [Available from: <http://antimicrobianos.com.ar/servicio-antimicrobianos>.  
58 652 32. McCormick BP, Quiroga MP, Álvarez VE, Centrón D, Tiftonell P. Antimicrobial resistance  
59 653 dissemination associated with intensive animal production practices in Argentina: A systematic review and  
60 654 meta-analysis. *Revista Argentina de Microbiología*. 2022;55(1):25-42.  
61 655 33. Temple B, Young A. Qualitative research and translation dilemmas. *Qualitative research*.  
62 656 2004;4(2):161-78.



- 1  
2  
3 657 34. Braun V, Clarke V. Using thematic analysis in psychology. *Qualitative research in psychology*.  
4 658 2006;3(2):77-101.
- 5 659 35. Boeije H. A purposeful approach to the constant comparative method in the analysis of qualitative  
6 660 interviews. *Quality and quantity*. 2002;36(4):391-409.
- 7 661 36. Tong A, Sainsbury P, Craig J. Consolidated criteria for reporting qualitative research (COREQ): a 32-  
8 662 item checklist for interviews and focus groups. *International journal for quality in health care*. 2007;19(6):349-  
9 663 57.
- 10 664 37. Instituto de la Promoción de la Carne Vacuna Argentina (IPCVA). Informe de faena y producción 2023  
11 665 [Available from: <http://www.ipcva.com.ar/vertex.php?id=2389>].
- 12 666 38. Rochford C, Sridhar D, Woods N, Saleh Z, Hartenstein L, Ahlawat H, et al. Global governance of  
13 667 antimicrobial resistance. *The Lancet*. 2018;391(10134):1976-8.
- 14 668 39. Pokharel S, Raut S, Adhikari B. Tackling antimicrobial resistance in low-income and middle-income  
15 669 countries. *BMJ Specialist Journals*; 2019. p. e002104.
- 16 670 40. Chen J, He J, Bergquist R. Challenges and response to pandemics as seen in a One Health perspective.  
17 671 *Science in One Health*. 2022;1:100010.
- 18 672 41. Castro-Sanchez E, Iwami M, Ahmad R, Atun R, Holmes AH. Articulating citizen participation in  
19 673 national anti-microbial resistance plans: A comparison of European countries. *European Journal of Public*  
20 674 *Health*. 2018;28(5):928-34.
- 21 675 42. With a massive race, PAHO Argentina spreads the word to prevent antimicrobial resistance [press  
22 676 release]. 2022.
- 23 677 43. Hernando-Amado S, Coque TM, Baquero F, Martínez JL. Antibiotic resistance: moving from  
24 678 individual health norms to social norms in one health and global health. *Frontiers in Microbiology*.  
25 679 2020;11:1914.
- 26 680 44. Lota MMM, Chua AQ, Azupardo K, Lumangaya C, Reyes KAV, Villanueva SYAM, et al. A  
27 681 Qualitative Study on the Design and Implementation of the National Action Plan on Antimicrobial Resistance in  
28 682 the Philippines. *Antibiotics*. 2022;11(6):820.
- 29 683 45. Sirijatuphat R, Chayangsu S, Srisompong J, Ruangkriengsin D, Thamlikitkul V, Tiengrim S, et al.  
30 684 Feasibility, Challenges, and Benefits of Global Antimicrobial Resistance Surveillance System Implementation:  
31 685 Results from a Multicenter Quasi-Experimental Study. *Antibiotics*. 2022;11(3):348.
- 32 686 46. Sumpradit N, Wongkongkathep S, Poonpolsup S, Janejai N, Paveenkittiporn W, Boonyarit P, et al.  
33 687 New chapter in tackling antimicrobial resistance in Thailand. *bmj*. 2017;358.
- 34 688 47. Rossi MA, Tokumoto M, Couto E, Di Bella A, Alstchuler M, Gomez N, et al. Survey of the levels of  
35 689 antimicrobial resistance in Argentina: WHONET program-1991 to 1994. *International journal of antimicrobial*  
36 690 *agents*. 1995;6(2):103-10.
- 37 691 48. Dapás JI, Quirós RE. Antimicrobial stewardship in low-and middle-income countries. *Current*  
38 692 *Treatment Options in Infectious Diseases*. 2018;10:17-27.
- 39 693 49. Boni S, Marin GH, Campaña L, Marin L, Corso A, Risso-Patron S, et al. Disparities in antimicrobial  
40 694 consumption and resistance within a country: the case of beta-lactams in Argentina. *Revista Panamericana de*  
41 695 *Salud Pública*. 2021;45:e76.
- 42 696 50. Brodbelt D. Breaking new ground in antimicrobial stewardship in companion animal veterinary  
43 697 practice. *Nature Communications*. 2021;12(1):2445.
- 44 698 51. Nind L. International trends impacting antimicrobial stewardship in animal health. *Australian*  
45 699 *veterinary journal*. 2019;97(9):362-4.
- 46 700 52. Singleton DA, Rayner A, Brant B, Smyth S, Noble P-JM, Radford AD, et al. A randomised controlled  
47 701 trial to reduce highest priority critically important antimicrobial prescription in companion animals. *Nature*  
48 702 *Communications*. 2021;12(1):1593.
- 49 703 53. World Health Organization. Integrated surveillance of antimicrobial resistance in foodborne bacteria:  
50 704 application of a one health approach: guidance from the WHO Advisory Group on Integrated Surveillanec of  
51 705 Antimicrobial Resistance (AGISAR). 2017.
- 52 706 54. Jimenez CEP, Keestra SM, Tandon P, Pickering AJ, Moodley A, Cumming O, et al. One Health  
53 707 WASH: an AMR-smart integrative approach to preventing and controlling infection in farming communities.  
54 708 *BMJ Global Health*. 2023;8(3):e011263.
- 55 709 55. Mendelson M. BSAC Vanguard Series: Inequality and antibiotic resistance. *Journal of Antimicrobial*  
56 710 *Chemotherapy*. 2022;77(2):277-8.
- 57 711 56. Blake LJ, Häsler B, Bannani H, Mateus AL, Eastmure E, Mays N, et al. The UK Antimicrobial  
58 712 Resistance Strategy 2013–18: A Qualitative Study of International and Domestic Policy and Action Related to  
59 713 Livestock and the Food Chain. *Frontiers in Sustainable Food Systems*. 2022;6:102.
- 60 714 57. Huang Q, Liu X, Zhao G, Hu T, Wang Y. Potential and challenges of tannins as an alternative to in-  
715 feed antibiotics for farm animal production. *Animal Nutrition*. 2018;4(2):137-50.

- 1  
2  
3 716 58. Farha AK, Yang Q-Q, Kim G, Li H-B, Zhu F, Liu H-Y, et al. Tannins as an alternative to antibiotics.  
4 717 Food Bioscience. 2020;38:100751.  
5 718 59. Hennink M, Kaiser BN. Sample sizes for saturation in qualitative research: A systematic review of  
6 719 empirical tests. Social Science & Medicine. 2022;292:114523.  
7 720  
8  
9  
10  
11  
12  
13  
14  
15  
16  
17  
18  
19  
20  
21  
22  
23  
24  
25  
26  
27  
28  
29  
30  
31  
32  
33  
34  
35  
36  
37  
38  
39  
40  
41  
42  
43  
44  
45  
46  
47  
48  
49  
50  
51  
52  
53  
54  
55  
56  
57  
58  
59  
60

For peer review only

1  
2  
3  
4  
5  
6  
7  
8  
9  
10  
11  
12  
13  
14  
15  
16  
17  
18  
19  
20  
21  
22  
23  
24  
25  
26  
27  
28  
29  
30  
31  
32  
33  
34  
35  
36  
37  
38  
39  
40  
41  
42  
43  
44  
45  
46  
47  
48  
49  
50  
51  
52  
53  
54  
55  
56  
57  
58  
59  
60



379x210mm (144 x 144 DPI)

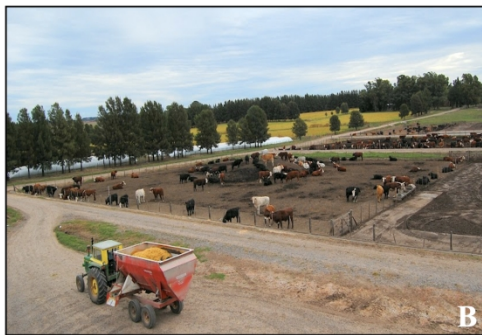

Around 52 million head of cattle are kept by livestock farmers in Argentina. The country produced 3.2 million tonnes of beef meat in 2020, of which 900,001 tonnes were exported (75% to China). However, the production chain involves a wide variety of actors and producers (from breeding, fattening, slaughtering, preservation, and sale) and the number of direct beef producers is estimated to be 230,000 with no significant market share among specific companies, compared to chicken or swine industries where three companies concentrate 70% of the market share. Although swine and chicken are amongst food-producing animals species with higher AMR rates for streptomycin, ampicillin and tetracycline resistance, there is still a research gap regarding beef-cattle from feedlots due to reduced AMR monitoring and control, including antibiotic usage. The cattle production chain is highly fragmented, and the movement dynamics of the animals through the production chain are complex, even though their transit must be registered to comply with SENASA guidelines, and all production units should be referenced in a computer database. However, in practicality, controlling thousands of animals at different production stages is challenging, and it is often hard to trace and follow to check if producers follow guidance in antibiotic use. In line with this, cattle vaccination rates against diarrheal or respiratory diseases are relatively low compared to the chicken and swine industry. Most livestock farms are family businesses where there is a partial vet role for antibiotic administration, and antibiotic storage in warehouses is often observed due to reduced control on acquisition.

C

437x291mm (144 x 144 DPI)

1  
2  
3  
4  
5  
6  
7  
8  
9  
10  
11  
12  
13  
14  
15  
16  
17  
18  
19  
20  
21  
22  
23  
24  
25  
26  
27  
28  
29  
30  
31  
32  
33  
34  
35  
36  
37  
38  
39  
40  
41  
42  
43  
44  
45  
46  
47  
48  
49  
50  
51  
52  
53  
54  
55  
56  
57  
58  
59  
60



441x232mm (144 x 144 DPI)

## Supplementary Material

Opportunities and challenges in antimicrobial resistance policy including animal production systems and humans across stakeholders in Argentina: a context and qualitative analysis

### Table of Contents

|                                                                                                                          |    |
|--------------------------------------------------------------------------------------------------------------------------|----|
| I. Timeline containing the legislation and policies in place within the AMR spectrum in Argentina.....                   | 2  |
| II. Summary of the Argentinian National Action Plan to combat AMR .....                                                  | 4  |
| III. Consent form for interviewees (participants) .....                                                                  | 8  |
| IV. Participant information sheet.....                                                                                   | 9  |
| V. Participant interview topic guide .....                                                                               | 11 |
| VI. Description of main preliminary topic codes applied to the interview analyses and their respective definitions ..... | 13 |
| VII. Themes ordered from broader to greater specificity. ....                                                            | 14 |
| VIII. Packed code cloud for identified themes/sub-themes .....                                                           | 15 |

## I. Timeline containing the legislation and policies in place within the AMR spectrum in Argentina

[1916] Creation of the formerly called Instituto Nacional de Microbiología “Malbran”, which is renamed in 1996 (see below).

[1956] Creation of the National Agricultural Technology Institute (INTA)

[1964] Act. 19 of the National Law of Medications No. 16,463. It states that "any form of advertising of products whose sale has not been authorized by prescription is prohibited" (subsection d).

[1967] National law regulating pharmaceutical activity. Also, the Directorate of Registration Inspection and Border Health of the Ministry of Health of the Nation, which upon verifying the violations of the regulations must initiate the corresponding summary actions and may conclude with the sanctions established in art. 45 of Law 17565 on the Exercise of Pharmacy Activity: warning, fine, closure of the establishment, suspension of registration and/or disqualification.

[1969] Decree number 3835/1969 of the Ministry of Public Health established that medicines with antibiotic activity for systemic use must be dispensed under a prescription filed by the dispenser, with penalties for non-compliance with: warning, fine, closure, suspension of registration, disqualification and /or prison of up to three years (Laws 17565/[1967](#) of Practice of Pharmacy and 26524/2009 of the Penal Code)

[1970] Decree number 3835/69 (later modified by decree number 378/70) of the then Ministry of Social Welfare. It established that medicines whose active pharmaceutical ingredients (IFAs) have antibiotic activity for systemic use must be dispensed according to their registration condition of January 1, 1970. Prescriptions must be archived by correlative date and kept for a period of two years, after which the pharmacy can delete them.

[1983] Creation of the National program of epidemiology and control of hospital-acquired infections, which was implemented and monitored by the National Institute of Epidemiology (INE), decree number 2885/83.

[1986] Creation of the National Antimicrobial Resistance Surveillance Network WHONET-Argentina

[1992] Creation of the National Administration of Medicines, Food and Medical Technology (ANMAT)

[1995] Creation of the Intensified National Epidemiological Surveillance System for Hospital Infections (SIVENIH), implemented on a pilot basis and involving 25 public and private hospitals in the country.

[1996] Creation of the National Administration of Laboratories and Institutes of Health (ANLIS), decree number 1628.

[1998] Creation of the National Service of Agri-food Health and Quality (SENASA)

[2001] Creation of the Argentine Beef Promotion Institute (IPCVA), law number 25,507.

[2004] Creation of the National Hospital Infection Surveillance Program (VIHDA) to monitor hospital-acquired infections in participating hospitals.

[2007] Decree number 609 states that antimicrobials must be sold only under prescription.

[2009] Law 26,524. The dispensation of any type of medicinal product without compliance with the legal conditions of sale would be considered as a crime, which can be punished with prison for up to three years.

[2011] Decree number 666/2011 determined that any establishments having food-producing animals must keep a record book for the administration of veterinary products, subject to inspections.

[2011] Decree number 666 determined that the food-producing establishments must keep a record book of treatments subject to inspection by SENASA in which all administration of veterinary products on production animals must be recorded.

1  
2  
3  
4 [2011] Act. 36 of Decree 7123/68, regulating Law 17,565, defined that: “The acquisition and sales provided by  
5 drugstores must be made by invoice and/or separate remittance..., keeping the Documentation filed in an orderly  
6 manner, making it available to the inspectors of the Secretary of State for Public Health, at their request.  
7

8 [2011-2013] ANMAT drug traceability programs (decree number 435, National Ministry of Health) and  
9 SENASA phytosanitary and veterinary products (SENASA, decree number 369/2013), will provide data on the  
10 commercialization and distribution of antimicrobials in humans and in food-producing animals and agriculture.  
11

12 [2013] Decree number 369/2013 created the Traceability System for Phytosanitary and Veterinary Products.  
13

14 [2013] SENASA instituted the National Phytosanitary and Veterinary Products Traceability System, which  
15 reports the volume and type of antimicrobials being marketed within the veterinary products framework for  
16 commercialization. This online system involves all the parts from the commercial chain; including the  
17 manufacturer or importer of the product to the veterinarian who indicates and sells it. In this way, every time a  
18 sale is made, the seller must declare what he sold, and the buyer who accepted the sale and who assumes  
19 responsibility for the possession of the products purchased.  
20

21 [2015] Decree number 834/2015 y 391/2015. Creation of the National Action plan for the surveillance,  
22 prevention and control of antimicrobial resistance (June) in line with the creation of the national commission for  
23 the control of antimicrobial resistance (CoNaCRA).  
24

25 [2015] Decree number 591. Creation of the National Plan for the surveillance of AMR in food-producing  
26 animals (November)  
27

28 [2015] Decree number 594/2015 prohibited the inclusion of antimicrobials in animal feed. This latest regulation  
29 points to the total prohibition (in 2019) of the use of antimicrobials as promoters of animal growth.  
30

31 [2015] The National Administration of Medicines, Food and Medical Technology (ANMAT) states that the  
32 pharmaceutical labelling of antimicrobials must agree with the usual doses and treatments duration (decree  
33 number 7,130).  
34

35 [2019] SENASA states that the manufacture, distribution, import, use and possession of veterinary products  
36 containing colistin is banned from veterinary products/medicine (Decree reference: EE 54429573/2018).  
37

38 [2022] Antimicrobial resistance prevention and control law (number 27680). National statement on establishing  
39 the appropriate mechanisms to promote and control antimicrobial resistance in the country. It is remarked as a  
40 problem of national interest that perpetuates overtime.  
41

#### 42 Additional sources

43 Chapters 6.7 to 6.10 of the WOA (World Organisation for Animal Health) Terrestrial Animal Health Code,  
44 which range from the harmonization of national AMR surveillance programmes to methodologies for  
45 monitoring the quantities of antimicrobials used and their patterns of use, the criteria for their prudent and  
46 responsible use, and the methodology for applying risk analysis derived from the use of antimicrobials in  
47 animals throughout the food chain.  
48

49 For more details on distribution and marketing of drugs in Argentina, see  
50 [https://uk.practicallaw.thomsonreuters.com/w-014-  
51 7135?transitionType=Default&contextData=\(sc.Default\)&firstPage=true](https://uk.practicallaw.thomsonreuters.com/w-014-7135?transitionType=Default&contextData=(sc.Default)&firstPage=true)  
52  
53  
54  
55  
56  
57  
58  
59  
60



## II. Summary of the Argentinian National Action Plan to combat AMR

### General overview

The national action plan was elaborated and designed by the Ministry of Health in 2015 (16) in partnership with the following organisations:

- The National Administration of Laboratories and Health Institutes (ANLIS)
- National Administration of Medicines, Food and Medical Technology (ANMAT) and the REMEDIAR Program
- Ministry of Agriculture, Livestock and Fisheries:
- National Service of Agri-food Health and Quality (SENASA)
- National Institute of Agricultural Technology (INTA)
- National Universities of La Plata and the Centre of the Province of Buenos Aires
- Representation for the Americas of the World Organization for Animal Health (WOAH)
- Argentinean Society of Infectious Diseases (SADI)
- Argentinean Society of Intensive Care (SATI)

The three main objectives of the national strategy (action plan) are:

- a) To prevent the emergence and spread of resistant bacteria through the regulation and supervision of antimicrobial sales, the promotion of their responsible use, and the prevention and control of healthcare-associated infections.
- b) To strengthen AMR surveillance and antimicrobial usage policies.
- c) To promote innovation, non-antibiotic growth promoters, and diagnostic tests to identify resistant bacteria.

These three main objectives comprise 10 different tasks detailed in the figure below.

**Figure SM1.** Main tasks of the Argentinian National Action Plan against AMR and their respective subobjectives.

| Main 10 tasks to combat AMR in Argentina                                       | Specific actions/sub-objectives                                                                                                                                                                                                                      |
|--------------------------------------------------------------------------------|------------------------------------------------------------------------------------------------------------------------------------------------------------------------------------------------------------------------------------------------------|
| 1. Promote leadership for the prevention and control of AMR                    | To develop and conduct a strategy for the prevention and control of AMR with experts' participation.<br>To fund strategies' activity to enhance participation/awareness.                                                                             |
| 2. Surveillance of AMR in human and animal health                              | To develop a national surveillance network coordinated by reference laboratories for human health, animal health and agri-food production.                                                                                                           |
| 3. Monitor antimicrobial consumption                                           | To develop a system for monitoring sales, access and appropriate and adequate use of antimicrobials.                                                                                                                                                 |
| 4. Regulate and supervise antimicrobials usage and sales                       | To establish prescription sales requirements and monitor its effective compliance.<br>To regulate the number of antimicrobial units in the pharmaceutical industry.<br>To prohibit the use of antimicrobials as growth promoters in food production. |
| 5. Promote responsible use of antimicrobials                                   | To develop guidelines for diagnosis and treatment of most prevalent infections.<br>To train health professionals on the appropriate and adequate use of antimicrobials and healthcare-associated infection prevention and control measures.          |
| 6. Promote community participation                                             | To disseminate the problem AMR might cause in the population and the establishment of education programs on the adequate use of antimicrobials                                                                                                       |
| 7. Implementation of antimicrobial usage control mechanisms                    | To implement antimicrobial management programs in health services                                                                                                                                                                                    |
| 8. Strengthen healthcare-associated infections prevention and control programs | To develop a surveillance strategy for healthcare-associated infections.                                                                                                                                                                             |

|                                                                                                    |                                                                                                                                                                                     |
|----------------------------------------------------------------------------------------------------|-------------------------------------------------------------------------------------------------------------------------------------------------------------------------------------|
|                                                                                                    | To implement prevention and control programs for healthcare-associated infections in healthcare services                                                                            |
| 9. Promote antimicrobial research as well as diagnostic methods                                    | To establish the problem of AMR as a priority matter that should be financed and researched. To prioritise the evaluation of new antimicrobials and explore new diagnostic methods. |
| 10. Monitoring and evaluating the achievement of the objectives stated in the national action plan | To create a professional commission to monitor and evaluate the implementation and execution of the strategy (National Action Plan)                                                 |

#### Overview of the animal and agri-food related sections

### **AMR SURVEILLANCE IN ANIMAL AND AGRIFOOD PRODUCTION** *[ANIMAL HEALTH SECTION of the national action plan]*

#### **Current situation of the AMR surveillance in animal health and agri-food production**

Surveillance is necessary for 3 groups of bacteria which have been primarily found in cattle, pigs, and birds: a) “indicator” bacteria, b) zoonotic bacteria, and c) pathogenic bacteria. Indicator bacteria are part of the intestinal microbiota of humans, other mammals, birds, and insects, and their importance lies in their ability to acquire and spread resistance genes that can be transferred to pathogenic or zoonotic bacteria.

#### **Strategic lines of the national action plan for the surveillance of AMR in animal health and agri-food production**

- a) Development and implementation of the national AMR surveillance program in food-producing animals to determine the presence of resistance to different antimicrobials in at least 2 commensal bacteria: *Escherichia coli* and *Enterococcus spp*, and 2 zoonotic bacteria: *Campylobacter spp* and *Salmonella spp*
- b) Harmonization of AMR surveillance strategies in human and animal health
- c) Development of communication tools and timely dissemination of information

#### **Specific actions of the national action plan for surveillance of AMR in animal health and agri-food production**

- a) To isolate commensal and zoonotic bacteria from cattle, pigs and poultry intended for human consumption, and determine their susceptibility profile to different antimicrobials
- b) To compare the results with data obtained from previous studies, when possible
- c) To determine the prevalence of AMR by animal species and by geographic region
- d) To correlate antimicrobial consumption with AMR
- e) To characterize and correlate resistance mechanisms between bacteria obtained from animal and human samples
- f) To carry out studies on the presence of antimicrobials in different sources (including water, food, etc.) and the impact of their use on the environment and production systems
- g) To evaluate alternative therapies for the use of antibiotics as growth factor in intensive production
- h) To evaluate the impact of antimicrobial administration in sources on the level of resistance observed in the environmental bacterial population.

Specifically, the National Directorate of Agrochemicals, Veterinary Products and Food of SENASA will be responsible for:

- a) Carrying out an annual monitoring of the volume of sales of antibiotics, with the collaboration of professional associations
- b) Providing data from the veterinary product traceability system as soon as it is fully operational

### **REGULATION OF ANTIMICROBIAL CONSUMPTION IN ANIMAL HEALTH AND AGRIFOOD PRODUCTION** *[ANIMAL HEALTH SECTION of the national action plan]*

For more than ten years, SENASA has carried out a Program for the Control of Residuals, Contaminants and Food Hygiene of animal origin. This program seeks to detect the presence of chemical residues and contaminants in foods of animal origin that may affect the health of consumers. Among the residues under control, we find various antimicrobial agents, which can generate antimicrobial resistance when they are present in food.

1  
2  
3  
4 **Strategic lines for the regulation of the use of antimicrobials in animal health and agri-food production**

- 5 a) Development and updating of regulations on the use of antimicrobials, aimed at preserving bacterial  
6 susceptibility as a non-renewable resource  
7 b) To participate in international seminars on regulatory practices to improve animal health  
8

9 **Specific actions to regulate the use of antimicrobials in animal health and agri-food production**

- 10 a) To compile and analyse the results of the surveillance and traceability systems for veterinary products to carry  
11 out risk analyses and therefore create risk profiles  
12 b) To strengthen control protocols on the indiscriminate sales and usage of antibiotics  
13 c) To ensure that all commercialization of antibiotics be carried out by a licensed professional  
14 d) To create a forum for discussion on the use of antimicrobials with the chambers of the veterinary products  
15 industry, professional associations, universities and the Ministry of Health  
16  
17

18 **RESPONSIBLE USE OF ANTIMICROBIALS IN ANIMAL HEALTH AND AGRIFOOD**  
19 **PRODUCTION [ANIMAL HEALTH SECTION of the national action plan]**  
20  
21

22 **Objectives:**

- 23 a) To ensure the rational use of antimicrobial agents in animals, with a view to optimizing their efficacy and  
24 safety  
25 b) To comply with the ethical obligation and the economic need to keep the animals in good health  
26 c) To prevent or reduce the transfer of resistant microorganisms or resistance determinants within animal  
27 populations, their environment and between animals and humans  
28 d) To contribute to maintaining the efficacy and usefulness of antimicrobial agents used in human and  
29 veterinary medicine  
30 e) To protect consumer health by ensuring the safety of foods of animal origin in relation to residues of  
31 antimicrobial agents

32 The measures include actions at the level of all stages and actors involved in the antimicrobial usage cycle, from  
33 their registration in SENASA to their prescription, marketing and consumption. The regulations generated by  
34 SENASA in recent years, have incorporated product traceability and treatment records, which are also in line  
35 with the WOA Code.  
36

37 **Strategic lines for the responsible use of antimicrobials in animal health and agri-food production**

- 38 a) Development of knowledge, training and information for veterinary professionals on the prudent and  
39 responsible use of antibiotics, based on pharmacokinetic, pharmacodynamic and toxicological bases  
40 b) Intensification of marketing controls for antimicrobials usage and dispensing  
41 c) To regulate the use of antimicrobials based on the information obtained from the surveillance program, and  
42 the corresponding risk analysis  
43 d) To increase pharmacological knowledge about the behaviour of antibiotic considering its impact on the  
44 environment  
45 e) To control the evolution of antibiotic resistance bacteria in clinics of small animals and intensive productions  
46 f) To promote the responsible use of antimicrobials, including their correct prescription and administration by  
47 veterinarians

48 **Specific actions for the responsible use of antimicrobials in animal health and food production**

- 49 a) To prepare a good-practice guide for the prescription and use of antimicrobials and other veterinary products,  
50 and in line with international guidelines  
51 b) To organise training courses and workshops for free practice veterinarians and those who work in the  
52 marketing chain or are in charge of livestock farms and balanced feed production plants, in conjunction with  
53 universities, professional associations and technical groups of exchange of the different productive activities  
54 (pigs, poultry, cattle, etc.)  
55 c) To incorporate AMR in the curriculum of veterinary careers, in joint work with the National Council of  
56 Veterinary Sciences  
57 d) To sustain and strengthen control in all stages of the distribution process and use of antimicrobials  
58  
59  
60

1  
2  
3  
4 **PREVENTION AND CONTROL OF INFECTIONS IN ANIMAL HEALTH AND AGRIFOOD**  
5 **PRODUCTION [ANIMAL HEALTH SECTION of the national action plan]**  
6

7 There are current international standards highlighting antimicrobials usage, including the Chapters 6.7 to 6.10 of  
8 the WOAH Terrestrial Animal Health Code.  
9

10 **Strategic lines for the prevention and control of infections in animal health**

- 11 a) To develop programs for the management, prevention and control of infectious diseases associated with AMR  
12 in veterinary medicine, considering the biosafety of intensive production establishments in terms of  
13 infrastructure and adequate equipment for infection prevention and control practices  
14 b) To train technical personnel assigned to intensive animal production for the prevention and control of  
15 infectious diseases in production environments; and  
16 c) Implementation of a network of laboratories for the identification of AMR microorganisms  
17

18 **Specific actions for the prevention and control of infections in animal health**

- 19 a) To develop regulations to enhance infection prevention and control between the Ministry of Agriculture,  
20 Livestock and Fisheries, the Ministry of Health, universities and professional associations  
21 b) To carry out training courses for veterinary professionals. Courses would be delivered by the Ministry of  
22 Agriculture, Livestock and Fisheries, the Ministry of Health, professional associations and universities  
23 c) To promote biosafety, hygiene and disinfection of personnel, equipment and productive environment  
24 compliance.  
25 d) To generate new laboratories equipped with diagnosis tools to determine the levels of AMR bacteria isolated  
26 from food animals and the emergence of resistance mechanisms to critical antimicrobials in human and animal  
27 health, as well as the proper use of antimicrobials  
28 e) Develop a monitoring and evaluation program to adopt joint strategies between the veterinary and human  
29 areas  
30

31 Also, SENASA, with the cooperation of ANLIS, INTA, and veterinary schools of national universities,  
32 implemented a parallel surveillance program for AMR in food-producing animals. The main objective of the  
33 plan is to determine and monitor the prevalence of AMR among food-producing animals to avoid the emergence  
34 and dissemination and to minimise the damage to the population and animal health (20). The program was  
35 designed in partnership with the following institutions: National Directorate of Agrochemicals, Veterinary  
36 Products and Food, National Directorate of Food Safety and Quality, National Directorate of Animal Health,  
37 General Directorate of Laboratories and Technical Control, and the General Coordination of Regional  
38 Management.  
39  
40  
41  
42  
43  
44  
45  
46  
47  
48  
49  
50  
51  
52  
53  
54  
55  
56  
57  
58  
59  
60

### III. Consent form for interviewees (participants)

Please initial box

1. I confirm that I have read and understood the Participant Information Sheet for the above study.
2. I have been given the opportunity to consider the information provided, ask questions and have had these questions answered to my satisfaction.
3. I understand that my participation is voluntary and that I can ask to withdraw before or during the interview without giving a reason and without my medical care or legal rights being affected. After the interview has been conducted and/or after data analyses, data will be anonymised and it will not be possible to withdraw.
4. I understand that my anonymised data will be stored for a minimum of 5 years and may be used in future ethically approved research.
5. I consent to this interview being recorded for the purpose of transcription after which the recording will be deleted.
6. I agree to take part in this interview.

Name of person giving consent

Date

Signature

\_\_\_\_\_

\_\_\_\_\_

\_\_\_\_\_

Name of person taking consent

Date

Signature

\_\_\_\_\_

\_\_\_\_\_

\_\_\_\_\_

## IV. Participant information sheet

You are being invited to take part in an interview on:

Agricultural antimicrobial supply chains and implementation of Antimicrobial Resistance National Action Plans in Argentina and the United Kingdom

Prof Lisa Boden, Prof Dominic Moran, Dr Emma Pitchforth, Dr Stephen Mackenzie, and Alejandro Petroni at the University of Edinburgh, University of Exeter and Argentinian National Administration of Laboratories and Health Institutes are facilitating these interviews/focus groups. Before you decide to take part, it is important you understand why we are conducting this interview and what it will involve. Please take time to read the following information carefully.

### **WHAT IS THE PURPOSE OF THIS INTERVIEW?**

This interview is intended to gather information about the current communication and interfacing between policy makers, scientific experts and stakeholders in agricultural Antimicrobial resistance and National Action Plan. Our long-term goal is to build relevant expertise to be able to design robust interventions and advice to improve antimicrobial resistance and national action plan implementation outcomes in the policy.

### **WHY HAVE I BEEN INVITED TO TAKE PART?**

You are invited to participate in this study because you have been working on or exposed to agricultural antimicrobial resistance decision-making issues in policy, either in the United Kingdom or Argentina.

### **DO I HAVE TO TAKE PART?**

No – it is entirely up to you whether you choose to take part. If you do decide to take part, please keep this Information Sheet and complete the Informed Consent Form to show that you understand your rights in relation to the meeting and that you are happy to participate. You may withdraw from an interview at any time and without giving a reason.

### **WHAT WILL HAPPEN IF I DECIDE TO TAKE PART?**

You will be invited to participate in a series of interviews and/or focus groups around agricultural antimicrobial resistance, antimicrobial supply and antimicrobial national action plans and how they are perceived and incorporated into policy decision making spaces and processes. Your expertise will allow us to work over the next three years on developing a series of robust suggestions to improve the science policy interface around antimicrobial resistance in both the UK and Argentina.

### **WHAT ARE THE POSSIBLE BENEFITS OF TAKING PART?**

By participating in this discussion and sharing your experiences with us, you will be helping the research team to engage and participate with local and national policy decision-makers around integration of scientific and policy-making expertise in mitigating the risks of antimicrobial resistance.

### **ARE THERE ANY RISKS ASSOCIATED WITH TAKING PART?**

There are no significant risks associated with participation.

### **WHAT IF I WANT TO WITHDRAW FROM THE STUDY?**

Agreeing to participate in this workshop does not oblige you to remain in the project nor have any further obligation to this project. If you no longer want to be part of the project, please inform Prof Lisa Boden [lisa.boden@ed.ac.uk]. You should note that your ideas may be used in the design and implementation of subsequent projects and interventions. You are advised to contact the research team at the earliest opportunity, preferably before the workshop should you wish to withdraw from the project.

### **INTERVIEWERS AND INTERVIEW'S DETAILS**

The interview will be performed by either our main researchers (detailed in the first paragraph) or Kasim Allel, who is a research fellow at the University of Exeter. The interview will take place at a time and

1  
2  
3 platform (virtual meeting via Zoom/Microsoft teams or in-person meetings) agreed upon both parties  
4 and depending on availability. The interview has five different stages covering participant's current  
5 role, understanding antimicrobial-resistance among stakeholders, information channels and flows  
6 within stakeholders/departments, challenges in the implementation of the national action plan, and  
7 future considerations. The interview has an approximate duration of 30-60 minutes per interview.  
8

### 9 **DATA PROTECTION AND CONFIDENTIALITY**

10 Any data collected will be processed in accordance with Data Protection Law and GDPR. All  
11 information collected about you will be kept strictly confidential. Unless they are anonymised in our  
12 records, your data will be referred to by a unique participant number rather than by name. Your data  
13 will only be viewed by the researcher/research team. Data might be classified by organisation/affiliation  
14 only if participants concur. All electronic data and transcripts will be stored on a password-protected  
15 computer file within Microsoft teams' shared folders. All paper records will be held in a locked filing  
16 cabinet. Your consent information will be kept separately from your responses to minimise risks.  
17

### 18 **WHAT WILL HAPPEN WITH THE RESULTS OF THIS STUDY?**

19 The outcomes of this meeting may also be summarised in reports and presentations to the funding  
20 agency or key stakeholders. The meeting may be video and audio recorded for the purpose of  
21 transcription. Quotes or key findings will always be made anonymous in any formal outputs unless we  
22 have your prior and explicit written permission to attribute them to you by name. Information may also  
23 be kept for future research.  
24

### 25 **WHO CAN I CONTACT?**

26 If you have any further questions about the project, please contact Prof. Lisa Boden,  
27 [lisa.boden@ed.ac.uk](mailto:lisa.boden@ed.ac.uk)  
28

29 If you wish to make a complaint about the project, please contact:  
30

31 Lisa Boden ([lisa.boden@ed.ac.uk](mailto:lisa.boden@ed.ac.uk)). In your communication, please provide the study title and detail  
32 the nature of your complaint.  
33

34 For general information about how we use your data go to:  
35

36 <https://www.ed.ac.uk/records-management/privacy-notice-research>  
37  
38  
39  
40  
41  
42  
43  
44  
45  
46  
47  
48  
49  
50  
51  
52  
53  
54  
55  
56  
57  
58  
59  
60

## V. Participant interview topic guide

You are being invited to take part in an interview on:

Agricultural antimicrobial supply chains and implementation of Antimicrobial Resistance National Action Plans in Argentina and the United Kingdom

[Please note this is a topic guide to support the semi-structured interviews. We do not envisage asking every question to every participant, but the questions are illustrative of what we hope to talk about]

### Introduction

Thank you for agreeing to take part in this interview.

Can I check that you have had a chance to read the study information sheet?

Do you have any questions about the study?

[if not returned prior to interview go through and complete consent form]

Are you happy for me to begin the interview and to start recording?

[turn on recorder]

Thank you.

The interview is designed to be free-flowing so please talk about anything that you feel is relevant, I have just prepared some questions structured into five broad areas.

### Interview's questionnaire

**BOX 1.** Survey's main sections: objectives and questions

**I. Participant's current role.** These questions will seek to understand what experiences our participants have and how they might be relevant to implementing the National Action Plan to combat AMR.

<1> What your job/role is, and what tasks do you and your organisation mainly perform?

<2> What are your (or department/organisation) interests and responsibilities concerning AMR?

**II. Understanding AMR among stakeholders.** This group of questions aim to understand employees' and organisations' views on AMR; its main drivers, change overtime, support venues, and priority areas within organisations to help tackle AMR.

<1> How do you feel (or what are your personal and department's concerns) about antimicrobial resistance in humans? Does that differ from antimicrobial-resistance in animals or any other source, including the environment (how)?

<2> Do you think the view about antimicrobial-resistance has changed over the years? How?

<3> What are the priority areas within your organisation to increase AMR awareness and to comply with the national action plan? Do you feel your organisation help contribute to any of the areas detailed in the national plan (how, which)?

<4> What are the cornerstones for increasing AMR awareness while complying with the national action plan within your organisation?

<5> Which cornerstones do you feel are most relevant within your department (organisation)? Why?



1  
2  
3 **III. Information channels and flow within stakeholders/departments.** These questions attempt to improve  
4 organisations decision making towards better AMR surveillance by identifying how the information is  
5 channelled within and between organisations.  
6

7 <1> how do you feel about AMR-related information and communication flow within your organisation and  
8 among all stakeholders?

9 <2> What do you think about communicational interactions, networking, and educational or getting-to-know  
10 instances between your organisation and other stakeholders and within departments of your organisation?  
11 Would you believe (and how) that the information pathways vary between specific organisation's  
12 fields/disciplines, public/private institutions, or certain other groups?

13 <3> Could you identify which organisms (organisations), and how, are involved in your organisation's decision  
14 making and strategy towards improving AMR surveillance and control?  
15

16 **IV. Challenges in the implementation of the national action plan.** These questions attempt to answer what  
17 factors or challenges might be key to increasing AMR awareness and improving AMR surveillance among food-  
18 producing animals and agriculture.  
19

20 <1> Do you feel there is any challenge that your organisation faces in complying with the AMR national action  
21 plan and helping contribute to better animal surveillance? (Political priorities, monetary and non-monetary  
22 resources, communication, etc) What are the most important and what can be done to overcome these challenges  
23 if your organisation could prioritise resources to contribute higher to AMR surveillance in animals?

24 <2> Who else do you think has a critical role in helping with AMR surveillance in animals from the pool of  
25 stakeholders?  
26

27 **V. Future and other considerations.** These questions aim to understand future steps to be taken within the  
28 industry and different key members to tackle AMR.  
29

30 <1> How organisations might be helped to enhance cross-communication and teamwork? How can we ensure  
31 organisations make progress and collaborate meeting NAP's criteria?

32 <2> Which organisations, at the national and international levels, do you think are most important to talk to and  
33 direct the efforts to address the gap in knowledge in AMR? Does the list differ for improving the NAP?

34 <3> Is there anything else important that you might want to share with us or that we are missing in the current  
35 interview?  
36  
37  
38  
39  
40  
41  
42  
43  
44  
45  
46  
47  
48  
49  
50  
51  
52  
53  
54  
55  
56  
57  
58  
59  
60

## VI. Description of main preliminary topic codes applied to the interview analyses and their respective definitions

**Table SM1. Topic codes and their definitions**

| <b>Code</b>                                              | <b>Definition</b>                                                                                                      |
|----------------------------------------------------------|------------------------------------------------------------------------------------------------------------------------|
| Application of NAP                                       | Implementation of NAP and roles, including views on progress                                                           |
| AMR control                                              | Perceived progress and challenges, inclusive of surveillance                                                           |
| Antibiotic access, use and regulation (human and animal) | Referring to antibiotic consumption and access and prescriptions in animals and humans                                 |
| Alternatives to antibiotics                              | Discussion of alternatives to antibiotics                                                                              |
| Context of Covid                                         | Referring to acceleration of AMR, potential opportunities and good practice, ways of working                           |
| Governance                                               | Government priorities, federalisation, vertical vs horizontal, nature of institutions/groups, accountability (lack of) |
| AMR knowledge/awareness                                  | Referring to public and professional awareness – the challenge of awareness and steps taken to address                 |
| Resources                                                | Referring to human and economic/budgetary resource (lack of) available to tackle AMR                                   |
| Stakeholders                                             | Describing/listing stakeholders involved                                                                               |
| Stakeholder communication                                | Communication (lack of) between stakeholders                                                                           |
| Cultural and country context                             | Understanding of importance of cultural, country context, including personal relationships                             |
| International actors and policies                        | Mention of international actors and role in/influence on national AMR in Argentina                                     |
| Food production                                          | Reference to food production markets, differences by animal species                                                    |
| Information/data flow                                    | All references, specifically to information/data e.g. capacity/system to share data                                    |
| Regulation and compliance                                | Description of different regulation, proposed change and perceived (potential) impact                                  |
| Political context and agenda //                          | Importance of (changing) political will                                                                                |
| Vet sector                                               | Including role of vet sector, antibiotic in animals                                                                    |
| Training and learning opportunities                      | Including seminars, conferences, courses, stewardship programs, etc.                                                   |

## VII. Themes ordered from broader to greater specificity.

Figure SM2. Structure of the ordered themes

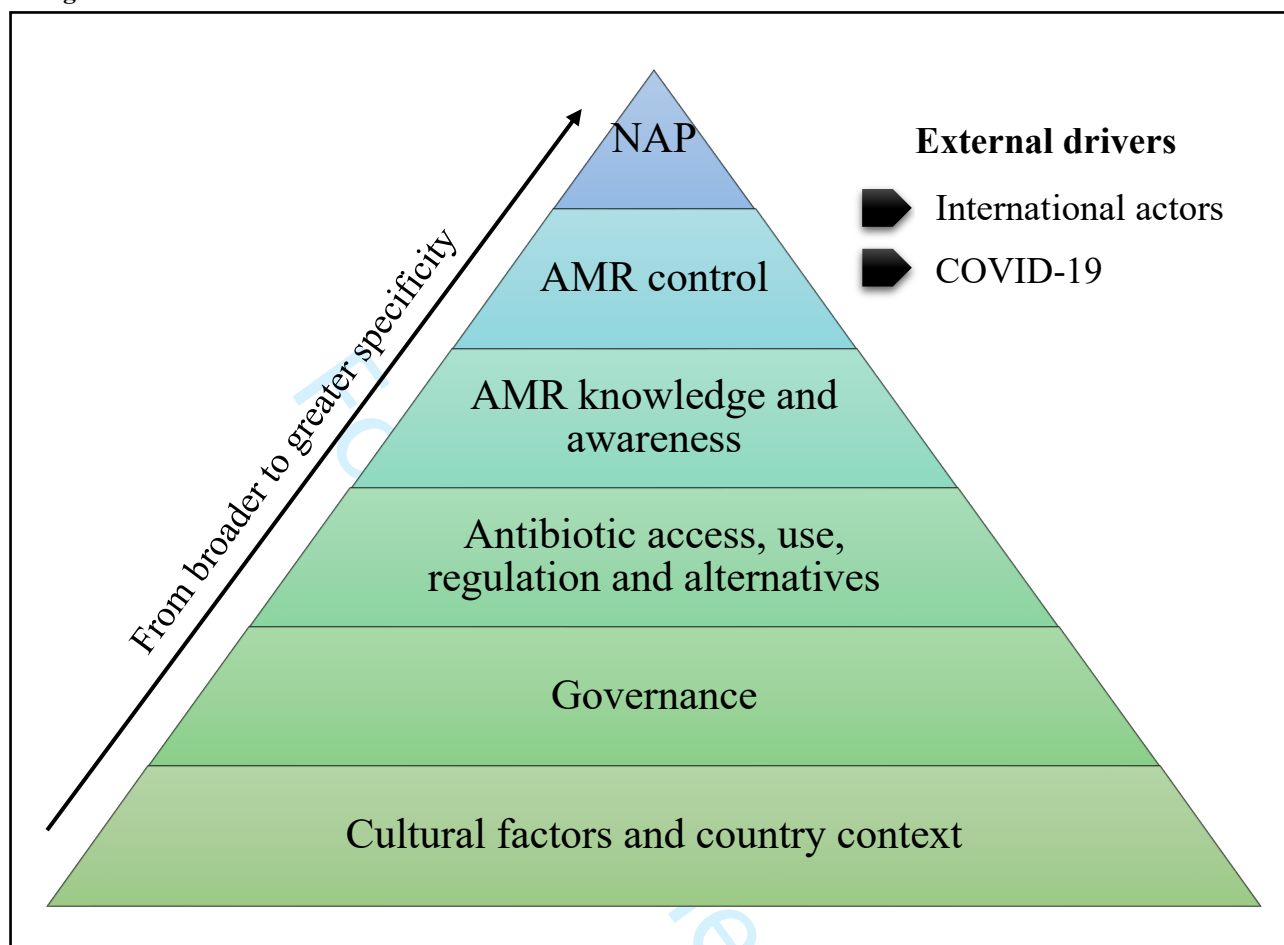

Notes: AMR= Antimicrobial resistance. NAP= National action plan.

## VIII. Packed code cloud for identified themes/sub-themes

Figure SM3. Code cloud for identified themes and sub-themes

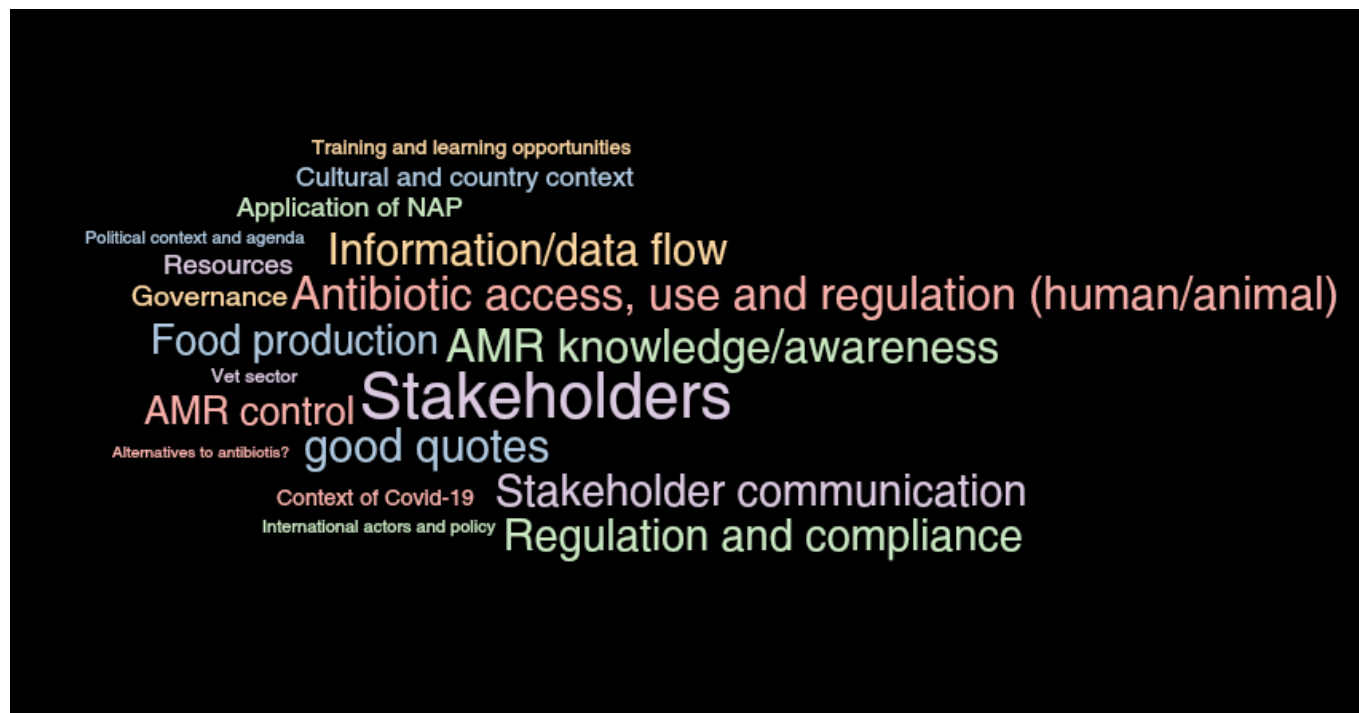

Notes: AMR= Antimicrobial resistance.

review only

## STROBE Statement—checklist of items that should be included in reports of observational studies

|                              | Item No                                                                                                                                                                                                                                                                                                   | Recommendation                                                                                                                                                                                                                                                                                                                                                                                                                                                         | Page No |
|------------------------------|-----------------------------------------------------------------------------------------------------------------------------------------------------------------------------------------------------------------------------------------------------------------------------------------------------------|------------------------------------------------------------------------------------------------------------------------------------------------------------------------------------------------------------------------------------------------------------------------------------------------------------------------------------------------------------------------------------------------------------------------------------------------------------------------|---------|
| <b>Title and abstract</b>    | 1                                                                                                                                                                                                                                                                                                         | (a) Indicate the study's design with a commonly used term in the title or the abstract                                                                                                                                                                                                                                                                                                                                                                                 | 1       |
|                              |                                                                                                                                                                                                                                                                                                           | (b) Provide in the abstract an informative and balanced summary of what was done and what was found                                                                                                                                                                                                                                                                                                                                                                    | 1       |
| <b>Introduction</b>          |                                                                                                                                                                                                                                                                                                           |                                                                                                                                                                                                                                                                                                                                                                                                                                                                        |         |
| Background/rationale         | 2                                                                                                                                                                                                                                                                                                         | Explain the scientific background and rationale for the investigation being reported                                                                                                                                                                                                                                                                                                                                                                                   | 3       |
| Objectives                   | 3                                                                                                                                                                                                                                                                                                         | State specific objectives, including any prespecified hypotheses                                                                                                                                                                                                                                                                                                                                                                                                       | 3       |
| <b>Methods</b>               |                                                                                                                                                                                                                                                                                                           |                                                                                                                                                                                                                                                                                                                                                                                                                                                                        |         |
| Study design                 | 4                                                                                                                                                                                                                                                                                                         | Present key elements of study design early in the paper                                                                                                                                                                                                                                                                                                                                                                                                                | 3-4     |
| Setting                      | 5                                                                                                                                                                                                                                                                                                         | Describe the setting, locations, and relevant dates, including periods of recruitment, exposure, follow-up, and data collection                                                                                                                                                                                                                                                                                                                                        | 4       |
| Participants                 | 6                                                                                                                                                                                                                                                                                                         | (a) <i>Cohort study</i> —Give the eligibility criteria, and the sources and methods of selection of participants. Describe methods of follow-up<br><i>Case-control study</i> —Give the eligibility criteria, and the sources and methods of case ascertainment and control selection. Give the rationale for the choice of cases and controls<br><i>Cross-sectional study</i> —Give the eligibility criteria, and the sources and methods of selection of participants | 4       |
|                              |                                                                                                                                                                                                                                                                                                           | (b) <i>Cohort study</i> —For matched studies, give matching criteria and number of exposed and unexposed<br><i>Case-control study</i> —For matched studies, give matching criteria and the number of controls per case                                                                                                                                                                                                                                                 | n/a     |
| Variables                    | 7                                                                                                                                                                                                                                                                                                         | Clearly define all outcomes, exposures, predictors, potential confounders, and effect modifiers. Give diagnostic criteria, if applicable                                                                                                                                                                                                                                                                                                                               | n/a     |
| Data sources/<br>measurement | 8*                                                                                                                                                                                                                                                                                                        | For each variable of interest, give sources of data and details of methods of assessment (measurement). Describe comparability of assessment methods if there is more than one group                                                                                                                                                                                                                                                                                   | 4       |
| Bias                         | 9                                                                                                                                                                                                                                                                                                         | Describe any efforts to address potential sources of bias                                                                                                                                                                                                                                                                                                                                                                                                              | 5       |
| Study size                   | 10                                                                                                                                                                                                                                                                                                        | Explain how the study size was arrived at                                                                                                                                                                                                                                                                                                                                                                                                                              | 4       |
| Quantitative variables       | 11                                                                                                                                                                                                                                                                                                        | Explain how quantitative variables were handled in the analyses. If applicable, describe which groupings were chosen and why                                                                                                                                                                                                                                                                                                                                           | 4-5     |
| Statistical methods          | 12                                                                                                                                                                                                                                                                                                        | (a) Describe all statistical methods, including those used to control for confounding                                                                                                                                                                                                                                                                                                                                                                                  | 4-5     |
|                              |                                                                                                                                                                                                                                                                                                           | (b) Describe any methods used to examine subgroups and interactions                                                                                                                                                                                                                                                                                                                                                                                                    | 4-5     |
|                              | (c) Explain how missing data were addressed                                                                                                                                                                                                                                                               | n/a                                                                                                                                                                                                                                                                                                                                                                                                                                                                    |         |
|                              | (d) <i>Cohort study</i> —If applicable, explain how loss to follow-up was addressed<br><i>Case-control study</i> —If applicable, explain how matching of cases and controls was addressed<br><i>Cross-sectional study</i> —If applicable, describe analytical methods taking account of sampling strategy | n/a                                                                                                                                                                                                                                                                                                                                                                                                                                                                    |         |
|                              | (e) Describe any sensitivity analyses                                                                                                                                                                                                                                                                     |                                                                                                                                                                                                                                                                                                                                                                                                                                                                        |         |

Continued on next page

| <b>Results</b>           |     |                                                                                                                                                                                                              |                       |
|--------------------------|-----|--------------------------------------------------------------------------------------------------------------------------------------------------------------------------------------------------------------|-----------------------|
| Participants             | 13* | (a) Report numbers of individuals at each stage of study—eg numbers potentially eligible, examined for eligibility, confirmed eligible, included in the study, completing follow-up, and analysed            | 5-6                   |
|                          |     | (b) Give reasons for non-participation at each stage                                                                                                                                                         | 5                     |
|                          |     | (c) Consider use of a flow diagram                                                                                                                                                                           | Figure 1, page 5-6    |
| Descriptive data         | 14* | (a) Give characteristics of study participants (eg demographic, clinical, social) and information on exposures and potential confounders                                                                     | 5-14                  |
|                          |     | (b) Indicate number of participants with missing data for each variable of interest                                                                                                                          | 5                     |
|                          |     | (c) <i>Cohort study</i> —Summarise follow-up time (eg, average and total amount)                                                                                                                             | n/a                   |
| Outcome data             | 15* | <i>Cohort study</i> —Report numbers of outcome events or summary measures over time                                                                                                                          | n/a                   |
|                          |     | <i>Case-control study</i> —Report numbers in each exposure category, or summary measures of exposure                                                                                                         | n/a                   |
|                          |     | <i>Cross-sectional study</i> —Report numbers of outcome events or summary measures                                                                                                                           | 5-13                  |
| Main results             | 16  | (a) Give unadjusted estimates and, if applicable, confounder-adjusted estimates and their precision (eg, 95% confidence interval). Make clear which confounders were adjusted for and why they were included | n/a qualitative study |
|                          |     | (b) Report category boundaries when continuous variables were categorized                                                                                                                                    | n/a qualitative study |
|                          |     | (c) If relevant, consider translating estimates of relative risk into absolute risk for a meaningful time period                                                                                             | n/a qualitative study |
| Other analyses           | 17  | Report other analyses done—eg analyses of subgroups and interactions, and sensitivity analyses                                                                                                               | 5-13                  |
| <b>Discussion</b>        |     |                                                                                                                                                                                                              |                       |
| Key results              | 18  | Summarise key results with reference to study objectives                                                                                                                                                     | 14-15                 |
| Limitations              | 19  | Discuss limitations of the study, taking into account sources of potential bias or imprecision. Discuss both direction and magnitude of any potential bias                                                   | 16                    |
| Interpretation           | 20  | Give a cautious overall interpretation of results considering objectives, limitations, multiplicity of analyses, results from similar studies, and other relevant evidence                                   | 16                    |
| Generalisability         | 21  | Discuss the generalisability (external validity) of the study results                                                                                                                                        | 16                    |
| <b>Other information</b> |     |                                                                                                                                                                                                              |                       |
| Funding                  | 22  | Give the source of funding and the role of the funders for the present study and, if applicable, for the original study on which the present article is based                                                | 16-17                 |

\*Give information separately for cases and controls in case-control studies and, if applicable, for exposed and unexposed groups in cohort and cross-sectional studies.

**Note:** An Explanation and Elaboration article discusses each checklist item and gives methodological background and published examples of transparent reporting. The STROBE checklist is best used in conjunction with this article (freely

1  
2 available on the Web sites of PLoS Medicine at <http://www.plosmedicine.org/>, Annals of Internal Medicine at  
3 <http://www.annals.org/>, and Epidemiology at <http://www.epidem.com/>). Information on the STROBE Initiative is  
4 available at [www.strobe-statement.org](http://www.strobe-statement.org).  
5  
6  
7  
8  
9  
10  
11  
12  
13  
14  
15  
16  
17  
18  
19  
20  
21  
22  
23  
24  
25  
26  
27  
28  
29  
30  
31  
32  
33  
34  
35  
36  
37  
38  
39  
40  
41  
42  
43  
44  
45  
46  
47  
48  
49  
50  
51  
52  
53  
54  
55  
56  
57  
58  
59  
60

For peer review only

# BMJ Open

## Opportunities and challenges in antimicrobial resistance policy including animal production systems and humans across stakeholders in Argentina: a context and qualitative analysis

|                                 |                                                                                                                                                                                                                                                                                                                                                                                                                                                                                                                                                                                                                                                                                                                                                                                                                                                                          |
|---------------------------------|--------------------------------------------------------------------------------------------------------------------------------------------------------------------------------------------------------------------------------------------------------------------------------------------------------------------------------------------------------------------------------------------------------------------------------------------------------------------------------------------------------------------------------------------------------------------------------------------------------------------------------------------------------------------------------------------------------------------------------------------------------------------------------------------------------------------------------------------------------------------------|
| Journal:                        | <i>BMJ Open</i>                                                                                                                                                                                                                                                                                                                                                                                                                                                                                                                                                                                                                                                                                                                                                                                                                                                          |
| Manuscript ID                   | bmjopen-2023-082156.R2                                                                                                                                                                                                                                                                                                                                                                                                                                                                                                                                                                                                                                                                                                                                                                                                                                                   |
| Article Type:                   | Original research                                                                                                                                                                                                                                                                                                                                                                                                                                                                                                                                                                                                                                                                                                                                                                                                                                                        |
| Date Submitted by the Author:   | 29-Apr-2024                                                                                                                                                                                                                                                                                                                                                                                                                                                                                                                                                                                                                                                                                                                                                                                                                                                              |
| Complete List of Authors:       | <p>Allel, Kasim; London School of Hygiene &amp; Tropical Medicine; University of Exeter, Faculty of Health and Life Sciences</p> <p>Fernandez-Miyakawa, Mariano; Instituto Nacional de Tecnología Agropecuaria</p> <p>Gaze, William; University of Exeter, Faculty of Health and Life Sciences</p> <p>Petroni, Alejandro; Instituto Nacional de Enfermedades Infecciosas</p> <p>Corso, Alejandra; Instituto Nacional de Enfermedades Infecciosas</p> <p>Luna, Federico; Independent researcher</p> <p>Barcelona, Laura; Comisión Nacional de Control de la Resistencia Antimicrobiana</p> <p>Argentina, AMR policy research group; Full list of authors provided at the end of the manuscript</p> <p>Boden, Lisa; University of Edinburgh Royal Dick School of Veterinary Studies</p> <p>Pitchforth, Emma; University of Exeter, Faculty of Health and Life Sciences</p> |
| <b>Primary Subject Heading</b>: | Public health                                                                                                                                                                                                                                                                                                                                                                                                                                                                                                                                                                                                                                                                                                                                                                                                                                                            |
| Secondary Subject Heading:      | Global health, Communication, Public health                                                                                                                                                                                                                                                                                                                                                                                                                                                                                                                                                                                                                                                                                                                                                                                                                              |
| Keywords:                       | Public health < INFECTIOUS DISEASES, Health policy < HEALTH SERVICES ADMINISTRATION & MANAGEMENT, QUALITATIVE RESEARCH                                                                                                                                                                                                                                                                                                                                                                                                                                                                                                                                                                                                                                                                                                                                                   |
|                                 |                                                                                                                                                                                                                                                                                                                                                                                                                                                                                                                                                                                                                                                                                                                                                                                                                                                                          |

SCHOLARONE™  
Manuscripts





I, the Submitting Author has the right to grant and does grant on behalf of all authors of the Work (as defined in the below author licence), an exclusive licence and/or a non-exclusive licence for contributions from authors who are: i) UK Crown employees; ii) where BMJ has agreed a CC-BY licence shall apply, and/or iii) in accordance with the terms applicable for US Federal Government officers or employees acting as part of their official duties; on a worldwide, perpetual, irrevocable, royalty-free basis to BMJ Publishing Group Ltd ("BMJ") its licensees and where the relevant Journal is co-owned by BMJ to the co-owners of the Journal, to publish the Work in this journal and any other BMJ products and to exploit all rights, as set out in our [licence](#).

The Submitting Author accepts and understands that any supply made under these terms is made by BMJ to the Submitting Author unless you are acting as an employee on behalf of your employer or a postgraduate student of an affiliated institution which is paying any applicable article publishing charge ("APC") for Open Access articles. Where the Submitting Author wishes to make the Work available on an Open Access basis (and intends to pay the relevant APC), the terms of reuse of such Open Access shall be governed by a Creative Commons licence – details of these licences and which [Creative Commons](#) licence will apply to this Work are set out in our licence referred to above.

Other than as permitted in any relevant BMJ Author's Self Archiving Policies, I confirm this Work has not been accepted for publication elsewhere, is not being considered for publication elsewhere and does not duplicate material already published. I confirm all authors consent to publication of this Work and authorise the granting of this licence.

# Opportunities and challenges in antimicrobial resistance policy including animal production systems and humans across stakeholders in Argentina: a context and qualitative analysis

Kasim Allel<sup>1,2</sup>, Mariano Fernandez-Miyakawa<sup>3</sup>, William Gaze<sup>1</sup>, Alejandro Petroni<sup>4</sup>, Alejandra Corso<sup>4</sup>, Laura Barcelona<sup>6</sup>, Federico Luna<sup>7</sup>, AMR policy research group Argentina<sup>†</sup>, Lisa Boden<sup>5</sup>, Emma Pitchforth<sup>1,\*</sup>

<sup>1</sup> Faculty of Health and Life Sciences, University of Exeter, Exeter, UK

<sup>2</sup> Department of Disease Control, London School of Hygiene and Tropical Medicine, London, UK

<sup>3</sup> Instituto Nacional de Tecnología Agropecuaria Castelar, Buenos Aires, Argentina

<sup>4</sup> Servicio Antimicrobianos, Instituto Nacional de Enfermedades Infecciosas, ANLIS “Dr Carlos G. Malbrán”, Buenos Aires, Argentina.

<sup>5</sup> Royal School of Veterinary studies, University of Edinburgh, Edinburgh, UK

<sup>6</sup> Comisión Nacional de Control de la Resistencia Antimicrobiana, Buenos Aires, Argentina.

<sup>7</sup> Independent researcher, Buenos Aires, Argentina.

<sup>†</sup> Full list of authors provided at the end of the manuscript

\* Corresponding author: e.pitchforth@exeter.ac.uk. University of Exeter Medical School, University of Exeter, Exeter EX1 2LU, UK.

## ABSTRACT

**Introduction.** Gaps in antimicrobial resistance (AMR) surveillance and control, including implementation of national action plans (NAP), are evident internationally. Countries' capacity to translate political commitment into action is crucial to cope with AMR at the human-animal-environment interface.

**Methods.** We employed a two-stage process to understand opportunities and challenges related to AMR surveillance and control at the human-animal interface in Argentina. First, we compiled the central AMR policies locally and mapped vital stakeholders around the NAP and the national commission against bacterial resistance. Second, we conducted qualitative interviews using a semi-structured questionnaire covering stakeholders' understanding and progress towards AMR and NAP. We employed a mixed deductive-inductive approach and used the constant comparative analysis method. We created categories and themes to cluster sub-themes and determined crucial relationships among thematic groups.

**Results.** Crucial AMR policy developments have been made since 1969, including gradually banning colistin in food-producing animals. In 2023, a new government decree prioritises AMR following the 2015 NAP launch. Our qualitative analyses identified seven major themes for tackling AMR: (I) Cultural factors and socio-political country context hampering AMR progress, (II) Fragmented governance, (III) Antibiotic access and use (IV) AMR knowledge and awareness throughout stakeholders, (V) AMR surveillance, (VI) NAP efforts, and (VII) External drivers. We identified a fragmented structure of the food production chain, poor cross-coordination between stakeholders, limited surveillance and regulation among food-producing animals, and geographical disparities over access, diagnosis and treatment. The country is moving to integrate animal and food production into its surveillance system, with most hospitals experienced in monitoring AMR through antimicrobial stewardship programs.

**Conclusion.** AMR accountability should involve underpinning collaboration at different NAP implementation levels and providing adequate resources to safeguard long-term sustainability. Incorporating a multisectoral context-specific approach relying upon different One Health domains is crucial to strengthening local AMR surveillance.

**Keywords:** Antimicrobial resistance, antibiotic use, Argentina, one health, low-and-middle income countries

### Strengths and Limitations

- ▶ We utilised a hybrid approach consisting of a historical synthesis of regulations regarding antimicrobial resistance and antibiotic usage across animal and humans, and qualitative analyses of the potential challenges and facilitators towards the national action plan to reduce antimicrobial resistance across key stakeholders.
- ▶ We used a mixed deductive-inductive approach alongside the constant comparative analysis method for qualitative analysis, enabling a deep integration and comprehensive understanding of complex datasets through the emergence of new themes and patterns
- ▶ The primary limitation of our study includes the varying levels of interviewees' involvement in AMR policies and the underrepresentation of certain sectors, notably the private industry.

## 1 Introduction

Antimicrobial resistance (AMR) represents a global public health threat driven by interrelated human, animal and environmental factors and requires multidisciplinary and cross-government action (1-3). National and international endeavours have collectively helped reduce AMR over recent years (4). The World Health Organisation (WHO) launched the Global Action Plan on AMR in 2015, soliciting countries to elaborate a National Action Plan (NAP) to confront AMR (5). Similar initiatives have come through the United Nations (UN)(6) and the European Commission (7) to develop multisectoral strategies involving human and animal health to fortify innovation stages and shape the global health agenda towards AMR NAPs. Despite 152 countries having published NAPs (8), challenges exist in implementing NAPs locally, limiting the progress towards addressing AMR (9). Contrasting cultures, policies, incentives and behaviours of relevant sectors and stakeholders have made the implementation of NAPs an arduous process (4). For instance, the lack of surveillance and epidemiological data, the variety of methods used to collect data and the limited understanding of the clinical and social burden of AMR pose challenges for the consummation of NAPs internationally (10). Locally, policy design, including governance and stakeholder involvement and cross-sectoral coordination, are critical to fulfilling the NAP's objectives while adapting the alternating demands of each local subgroup (4, 11).

Recent literature suggests that low- and middle-income countries (LMICs) are likely to face the most significant challenges in NAP implementation (4, 12-20). Among LMICs in Asia, a review found that accountability—a sense of ownership of organisations or people requiring responsibility to other stakeholders—has been omitted in most NAPs (4). Indications of unmet goals and lack of clarity in the stakeholders' role remain significant obstacles to AMR prevention and control (14, 15, 18). In the Americas, 29 countries (89%) have reported developing NAPs to combat AMR since the beginning of 2020 (21). However, most countries including Argentina, have not focussed sufficiently yet on One Health components; active surveillance of human health is not integrated with surveillance in animals or the environment (4, 18). Using a One Health approach is critical for effective NAP implementation because it optimizes the health of different sectors, including natural environments which play a crucial role in AMR evolution and transmission, while preventing zoonotic diseases and improving food safety and security. Argentina implemented a multisectoral NAP strategy in 2015 (22), and progress has been made, including the prohibition of colistin usage in 2019 and gradual banning of antibiotics as growth promoters among livestock (23, 24). A recent study measuring global response to AMR by employing a governance framework on NAP contents highlighted that Argentina can make improvements in standards to control AMR (18). The study stated Argentina's moderate efforts towards monitoring and evaluating AMR in humans and animals and modest AMR policy design (i.e., lack of accountability). However, the study used the Tripartite Antimicrobial Resistance Country Self-Assessment (TrACSS) survey, which could be influenced by the exclusion of publicly and privately accessible documents relevant for AMR monitoring locally, and it lacked data sources that could invite heterogeneity (e.g., interviews with multiple experts/ stakeholders), all of which are considerably important in LMICs. A more direct way to explore Argentine's response to AMR policy is to obtain current data from the stakeholders involved.

This study aims to better understand the stakeholder and regulatory landscape and the challenges and opportunities Argentina faces in implementing its NAP. We examined Argentina's case because it is one of the first countries to have a NAP and has a vast experience in AMR surveillance in the human sphere, which might indicate a good model for the Latin American region. We use the One Health (25) approach to assess policy priorities in action plans, and the governance framework (26) to evaluate interrelated dynamics between the One Health actors to improve critical areas: policy design, implementation tools, and monitoring and evaluation. The need to provide technical and financial support for implementing One-Health integrated NAPs has been recognised globally through the AMR Multi-Partner Trust Fund. Still, the donor base for this remains a few countries (27, 28). Global action may be based on shared goals, but there is a further need to understand the needs and priorities enabling or hindering those actions at national levels. We explore Argentina as a case-study to understand the complex landscape.

## 2 Methods

### 2.1 Study aims and setting

This article draws on literature and qualitative interview data from a study conducted in Argentina between September 2022 and February 2023. Argentina is an upper-middle income country that is endowed with highly fertile soils and great potential for renewable energy (hydroelectric, wind and solar energy) (29). It is a major food-producing country with an extensive agriculture and livestock industry; however, the country faces a high fiscal deficit with poverty and inflation rates of about 39% and 94.8% in 2022, respectively. The project's scope was to comprehend the context of AMR policy locally and among relevant stakeholders towards AMR control

and surveillance, focusing on food-producing animals. Relevant stakeholders included government (those with political/administrative duties and those having scientific-technical functions), academic, international, NGOs, and private (chamber of producers, commercial laboratories and producers) institutions.

### Study design

We divided our study into two stages. First, we explored the legal framework within the AMR NAP scope and mapped vital organisations, particularly related to food-producing animals (i.e., cattle, chicken and pigs). We searched the literature, including government documents, academic articles, stakeholder's websites, and grey literature, to capture the most relevant AMR policies and critical actors and their role over time. Most sources were identified from the website of the National Commission for AMR control (CoNaCRA, "*Comisión Nacional de Control de la Resistencia Antimicrobiana*") (30) the National Institute of Infectious Diseases (INEI) (31), and government website for national laws (<http://www.infoleg.gob.ar/>). A recent systematic literature review was also utilised to support evidence synthesis and mapping (32). Moreover, expert knowledge was consulted for main organisations related to the AMR NAP and food-producing animals, and their interactions with stakeholders. Second, after identifying and mapping relevant stakeholders, we conducted qualitative semi-structured interviews between September 2022 and January 2023 to gather information on stakeholder's views and experiences of NAP implementation, the role of different organisations and nature of coordination and decision making between organisations. Interviews were held in person or online lasting 45 to 90 minutes and were conducted by a bi-lingual (English-Spanish) social scientist. The stakeholder mapping developed in stage 1 was used to inform recruitment. A range of participants were sought from government, private and academic organisations. Potential participants were sent a formal request letter via email inviting them to take part in the interview study. Semi-structured interviews were performed using an interview topic guide designed to explore five main items, with questions and objectives detailed below (Box 1). Stakeholders were encouraged to discuss their own views openly. After obtaining informed consent, interviews were audio-recorded in Spanish and transcribed and translated to produce English and Spanish transcripts. Transcripts were checked for accuracy by the interviewer and anonymised. Translation bias was minimised by analysing both original and translated versions by Spanish native speakers (i.e., KA and a qualified third-party translator from Argentina). Back-translation was performed with a reduced sample (20%) of interviews to validate the accuracy of the initial translation (no discrepancies were found). Special attention was given to cultural references, idiomatic expressions, and regional dialects to ensure that translations were contextually appropriate and culturally sensitive (33). The consent form, participant information sheet, and participants interview topic guide are included in the online supplementary material.

#### Box 1. Interview's main sections including objectives, items and questions

**I. Participant's current role.** These questions seek to understand what experiences our participants have and how they might be relevant to implementing the NAP to combat AMR.

<1> What your job/role is, and what tasks do you and your organisation mainly perform?

<2> What are your (or department/organisation) interests and responsibilities concerning AMR?

**II. Understanding AMR among stakeholders.** This group of questions aim to understand employees' and organisations' views on AMR; its main drivers, change overtime, and priority areas within organisations to help tackle AMR.

<1> How do you feel (or what are your personal and department's concerns) about antimicrobial resistance in humans? Does that differ from antimicrobial-resistance in animals or any other source, including the environment (how)?

<2> Do you think the view about antimicrobial-resistance has changed over the years? How?

<3> What are the priority areas within your organisation to increase AMR awareness and to comply with the NAP? Do you feel your organisation helps to contribute to any of the areas detailed in the national plan (how, which)?

<4> What are the cornerstones for increasing AMR awareness while complying with the NAP within your organisation?

<5> Which cornerstones do you feel are most relevant within your department (organisation)? Why?

1  
2  
3 113 **III. Information channels and flow within stakeholders/departments.** These questions attempt to improve  
4 114 organisations decision making towards better AMR surveillance by identifying how the information is  
5 115 channelled within and between organisations.

6  
7 116 <1>How do you feel about AMR-related information and communication flow within your organisation and  
8 117 among all stakeholders?

9 118 <2> What do you think about communicational interactions, networking, and educational or getting-to-know  
10 119 instances between your organisation and other stakeholders and within departments of your organisation?  
11 120 Would you believe (and how) that the information pathways vary between specific organisation's  
12 121 fields/disciplines, public/private institutions, or certain other groups?

13 122 <3> Could you identify which organisms (organisations), and how, are involved in your organisation's decision  
14 123 making and strategy towards improving AMR surveillance and control?

15  
16 124 **IV. Challenges in the implementation of the national action plan.** These questions attempt to answer what  
17 125 factors or challenges might be key to increasing AMR awareness and improving AMR surveillance in food-  
18 126 producing animals and agriculture.

19  
20 127 <1> Do you feel there is any challenge that your organisation faces in complying with the AMR NAP and  
21 128 helping contribute to better animal AMR surveillance? (Political priorities, monetary and non-monetary  
22 129 resources, communication, etc) What are the most important and what can be done to overcome these challenges  
23 130 if your organisation could prioritise resources to contribute more to AMR surveillance in animals?

24 131 <2> Who else do you think has a critical role in helping with AMR surveillance in animals from the pool of  
25 132 stakeholders?

26  
27 133 **V. Future and other considerations.** These questions aim to understand future steps to be taken within the  
28 134 industry and different key members to tackle AMR.

29  
30 135 <1> How organisations might be helped to enhance cross-sectoral communication and teamwork? How can we  
31 136 ensure organisations make progress and collaborate to meet NAP criteria?

32 137 <2> Which organisations, at the national and international levels, do you think are most important to talk to and  
33 138 direct efforts to address AMR knowledge gaps? Does the list differ from that necessary to improve the NAP?

34 139 <3> Is there anything else important that you might want to share with us or that we are missing in the current  
35 140 interview?

36  
37 141  
38 142 **Data analyses**

39 143 First, we systematically organised Argentina's main AMR regulations using a timeline frame and drew a map to  
40 144 delineate the main stakeholders directly or indirectly supporting the CoNaCRA directed by the Coordination on  
41 145 appropriate use of antimicrobials of the ministry of health, as the commission articulating the efforts for the  
42 146 implementation of the NAP. Second, we employed a systematic qualitative thematic analysis of the interviews  
43 147 using a mixed deductive-inductive approach (34); deductive because it was guided by interview questions from  
44 148 a general topic to a more specific, but inductive as we draw data-driven conclusions derived from bottom-up  
45 149 reasoning. We followed the constant comparative method (35) to favour participants' comparability.  
46 150 Information and open data were classified into themes and subgroups using a coding scheme. Two investigators  
47 151 independently recorded the interviews (KA, EP) using Dedoose software (V.8.0.35, Los Angeles, California:  
48 152 Socio Cultural Research Consultants, LLC). Researchers frequently met to reconcile differences in code  
49 153 application and distinguish new themes emerging from the data analyses. After consolidating new themes, all  
50 154 interviews were re-coded using an updated scheme (see online supplementary material). Subsequently, we  
51 155 identified interconnections between theme data to ascertain larger categories into which themes were clustered.  
52 156 For quotations, we report descriptive characteristics, such as organisation type (academia, government, private,  
53 157 production system), sex at birth, and assigned a random number to each interviewee. Quotes are reported in the  
54 158 text and Tables as "Q" followed by ordered numbers. We reported descriptive statistics to facilitate reader's  
55 159 understandability from whom quotations were drawn and favour studies' transparency while maintaining the  
56 160 anonymity of participants. We utilised the consolidated Criteria for Reporting Qualitative Research (COREQ)  
57 161 checklist to guide reporting of findings (36).

58 162  
59 163 **Patient and public involvement**

60 164 This study was focused on the views and experiences of professionals. Patient and public involvement was  
165 therefore not included but we ensured engagement with the community of interest. Public health experts from

166 Argentina and the UK contributed feedback on our study design and research questions, ensuring relevance and  
 167 applicability across diverse settings without direct involvement in the core research process.

## 168 Results

169

### 170 I. First stage: review of policies and mapping key stakeholders

171 The timeline containing established laws and regulations related to AMR is found in Supplementary material  
 172 section I. Briefly, antimicrobial regulation started in the early 60's with the first law of medications and  
 173 enforced prescriptions for antibiotic acquisition. In 2007-9, new decrees were introduced instituting required  
 174 prescription for antibiotic sale and compliance for dispensation of medicines, including the registration book of  
 175 veterinary medicines usage in food-producing animals (2009-11, decree number 26514). In 2013, Argentina's  
 176 national Food Safety and Quality Service (SENASA) created the traceability system for veterinary medicines,  
 177 which links sellers and purchasers where entities take full responsibility for antibiotic possession.  
 178 Consecutively, Argentina's national commission for the control of AMR (CoNaCRA) was established and led  
 179 the launch of the NAP in 2015 (see Supplementary material section II for a summary). This was concurrent with  
 180 the abolition of antibiotic usage as an animal growth promoter (2015). The national law towards gradual  
 181 prohibition of colistin usage in any form/ingredient took place in 2019. Recently, there was a new law  
 182 encompassing an One health AMR agenda in the future (decree number 27680) aiming to foster and promote  
 183 AMR control, prevention, research, regulation, and awareness (24).

184 Finally, Figure 1 shows the mapping of key AMR surveillance and control stakeholders. We organised it  
 185 starting from the CoNaCRA as the commission responsible for the implementation of the NAP and those  
 186 relevant organisations surrounding them (main governmental divisions in brown boxes).

187

### 188 II. Second stage: qualitative analyses

#### 189 Descriptive characteristics of study participants

190 We approached 27 individuals initially (non-response levels=33%), but our final sample consisted of 18  
 191 participants (six women, 33%) mostly based in Buenos Aires city (88%) and from diverse institutions including  
 192 government (N=9), academia (N=3), private (N=2), NGOs (3) and international organisations (N=1).

193

#### 194 Thematic categories and codes

195 Barriers, opportunities, and state-of-art information contributing to human and food-producing animal AMR  
 196 were clustered into seven thematic categories organised by specificity level (from less and more specific themes  
 197 towards AMR policy). Themes were established based upon number of mentions and repetitiveness. Two  
 198 themes emerged from Argentina's embedded values and political context impacting AMR indirectly: (I)  
 199 Cultural factors and country context and (II) Governance. Four themes were directly associated with AMR: (III)  
 200 Antibiotic access and use, (IV) AMR knowledge and awareness, (V) AMR surveillance, (VI) National action  
 201 plan efforts. The remaining theme was linked to external factors indirectly affecting all chain's decision-making:  
 202 (VII) External drivers. The full definition of themes —ordered from less to more specific except for external  
 203 drivers, which affects them all— with their respective sub-themes, are shown in Table 1.

204

#### 205 Theme I. Cultural factors and socio-political country context

206 This category involved country characteristics that determine the response to AMR. Interviewees described that  
 207 country's economic and political shifts, including goods shortages and high inflation rates, had jeopardised the  
 208 health system, bringing instability over time to AMR control. Most political decisions in a resource-constrained  
 209 country were said to be difficult to manage but high reliance upon people and relationships was essential. For  
 210 instance, a participant described frustration and uncertainty but ability to cope with challenges despite the  
 211 economic circumstances.

212 *“Argentina has 30 years of experience on AMR surveillance, we live economic shortages and political shifts*  
 213 *fiercely in Argentina; a state of crisis, and we are somewhat used to this dynamic trying to cope with it as*  
 214 *best we can. We have developed good coordinating links between teams centralised on good communication*  
 215 *skills, but we cannot guarantee sustainability. It will depend on future leader's coordination since monetary*  
 216 *resources are limited, a lot relies upon the projects or people's willingness to contribute but we believe it will*  
 217 *perpetuate”*—Participant from a public institution (ID=9), female.

218 Most participants agreed that changing people's attitudes and behaviour, especially among food-producing  
 219 animal producers, is challenging due to embedded values (Q1, Table 2). For instance, a participant described it  
 220 as follows:

221 *“Inappropriate antibiotic use, driven by cultural norms like self-medication and seeking quick remedies is often*  
 222 *influenced by limited healthcare access. This extends into food production, where profit motives can override caution.*  
 223 *A shift in cultural perspective is crucial, educating on responsible use and the benefits of animal welfare and*  
 224 *sustainable practices across the sectors”* —Participant, from a public institution (ID=6), male.

225

226 *Theme II. Governance*

227 Participants reported constraints in the administration system that limited or enhanced their ability to perform  
 228 improvements towards tackling AMR. Most participants recognised that SENASA conducts extensive and well-  
 229 articulated labour; however, they emphasised the lack of auditing and accountability in decentralised  
 230 administrations (regions) in Argentina, which hampers AMR control due to the inherent variability in the quality  
 231 of care and health access (Q3, Table 2). Efforts to homogenise quality of care and access to antibiotics in  
 232 humans and animals are ongoing, but monetary and non-monetary resources are bounded (Q4, Table 2).  
 233 Although resources were finite, stakeholders' communication was often seen as a local strength and the  
 234 cornerstone of policy making. Good interpersonal relationships within the public, academic, NGOs and  
 235 international organisations were reported (Q5, Table 2). However, a demand for more integrated services and  
 236 decision-making was stated (Q5), translating into the need to foster horizontal information flows with mutually  
 237 integrated systems and organisations throughout the country (Q6, Table 2).

238  
 239 Regarding the regulation sub-theme, there are positive views towards the new law on antimicrobial use, despite  
 240 the former law introducing some restrictions but lacking control on usage, prescribing and storage (most  
 241 frequent among animals) (Q7, Table 2). On top of all previously discussed factors, the political context and  
 242 agenda were considered critical for AMR control but conflicting depending on the country's obstacles and  
 243 people in charge (Q8, Table 2).

244 **Table 1.** Main themes, definitions and sub-themes identified from the interview analysis (N=18 people)

| Themes <sup>†</sup>                                            | Definitions                                                                                                                                                                                                                                                                                  | Sub-Themes                                                                                                                                                              | N of times mentioned*                              |
|----------------------------------------------------------------|----------------------------------------------------------------------------------------------------------------------------------------------------------------------------------------------------------------------------------------------------------------------------------------------|-------------------------------------------------------------------------------------------------------------------------------------------------------------------------|----------------------------------------------------|
| <b>I. Cultural factors and socio-political country context</b> | Understanding the importance of cultural, country context, including personal relationships                                                                                                                                                                                                  | [1]Cultural features<br>[2]National context and sociodemographic characteristics                                                                                        | [1]21<br>[2]18                                     |
| <b>II. Governance</b>                                          | Government attributes related to political priorities, federalisation, nature of institutions/groups, accountability, human and economic/budgetary resource available, data systems and capacity, importance of changing political will, regulations and communication between stakeholders. | [1]System governance<br>[2]Resources<br>[3]Stakeholder communication<br>[4]Information and data flow<br>[5]Regulation and compliance<br>[6]Political context and agenda | [1]23<br>[2]22<br>[3]39<br>[4]39<br>[5]38<br>[6]11 |
| <b>III. Antibiotic access and use</b>                          | Referring to antibiotic consumption and access, prescriptions control and alternatives being developed among animals and humans.                                                                                                                                                             | [1]Antibiotic access<br>[2]Antibiotic consumption<br>[3]Antibiotic regulations including prescriptions.<br>[4]Alternatives to antibiotics                               | [1]15<br>[2]11<br>[3]14<br>[4]9                    |
| <b>IV. AMR knowledge and awareness</b>                         | Related to public and professional awareness – the challenge of awareness and steps taken to address it including seminars, conferences, courses, stewardship programs, advertising campaigns using mass media, etc.                                                                         | [1]Challenges related to public and professional awareness.<br>[2]Existing training and learning opportunities                                                          | [1]41<br>[2]15                                     |
| <b>V. AMR surveillance</b>                                     | Perceived progress and challenges, inclusive of AMR surveillance. Reference to food production markets including differences by animal species                                                                                                                                               | [1]AMR surveillance<br>[2]Food production systems and specific surveillance<br>[3]Veterinary sector, agent of change                                                    | [1]34<br>[2]35<br>[3]14                            |



|                                        |                                                                                                                                                                                         |                                                                   |                |
|----------------------------------------|-----------------------------------------------------------------------------------------------------------------------------------------------------------------------------------------|-------------------------------------------------------------------|----------------|
|                                        | and the role of the veterinary sector on AMR surveillance.                                                                                                                              |                                                                   |                |
| VI. National action plan (NAP) efforts | Implementation of NAP and professional roles, including views on progress over time                                                                                                     | [1]NAP progress including challenges, barriers, and opportunities | [1]22          |
| VII. External drivers                  | Referring to external factors contributing to the acceleration of AMR, potential opportunities, and good practice, including international actors and role in/influence on national AMR | [1]Context of COVID-19<br>[2]International actors and policies    | [1]16<br>[2]12 |

Notes: AMR= Antimicrobial resistance. †Themes are ordered from less to more specific levels (except for external drivers which affects them all), see Figure SM2, Supplementary material, for visual hierarchy. \*Codes can be mentioned more than once per interview.

**Table 2.** Quote examples by themes and sub-themes and identification of challenges and opportunities

| Themes <sup>†</sup>                                     | Sub-theme | Representative quote examples                                                                                                                                                                                                                                                                                                                                                                                                                                                                                                                                                                                                                     | Challenge/opportunity     |
|---------------------------------------------------------|-----------|---------------------------------------------------------------------------------------------------------------------------------------------------------------------------------------------------------------------------------------------------------------------------------------------------------------------------------------------------------------------------------------------------------------------------------------------------------------------------------------------------------------------------------------------------------------------------------------------------------------------------------------------------|---------------------------|
| I. Cultural factors and socio-political country context | [1]       | Q1: “AMR is a cross-cutting issue, but with older-generation low-educated producers living mostly in remote areas (a large quantity), it has been difficult to make them switch their mindset and understand that antibiotics are not necessary for food production, if no bacterial disease is present, and that antibiotic misuse and AMR affect humans and animal well-being.”—Veterinary, public institution(ID=3), male.                                                                                                                                                                                                                     | Challenge                 |
|                                                         | [2]       | Q2: “Today, in Argentina, we have 52% poverty and talking about AMR is challenging, considering that 95% of the population is deprived. Telling people to buy cage- and antibiotic-free eggs for a double price seem problematic, considering that overcrowding, hunger, and lack of sewers are constant daily challenges” —Participant from an NGO (ID=13), male.                                                                                                                                                                                                                                                                                | Challenge                 |
| II. Governance                                          | [1]       | Q3: “SENASA is very dynamic but there is lack of accountability from each participating institution when combatting AMR. It is worrisome that SENASA’s and other public organisation’s labours are highly centralised in the capital, because there is a high heterogeneity in access to treatment, diagnosis, quality standards for animal products, and antibiotic prescribing throughout the country. We know SENASA, for instance, is impeccable but our surveillance system is not punitive, whereas it mostly teaches producers as we do not know where those AMR pathogens came from (reservoirs)” —Participant from an NGO (ID=12), male. | Challenge and opportunity |
|                                                         | [2]       | Q4: “I think that the most important difficulty is economic and human resources, because especially in public institutions, it is challenging for people to have exclusive and fully compensated dedication” —Participant from a public institution (ID=11), female.                                                                                                                                                                                                                                                                                                                                                                              | Challenge                 |
|                                                         | [3]       | Q5: “We have solid communication channels between governmental institutions (SENASA, INTA, MALBRAN, CoNaCRA) and somewhat with international and academic institutions, but we should employ a strategy of involvement between technical scientific groups, hospital and veterinary leaders, the private industry, including pharmaceutical, and meat producers and related organisations. We need to tell them what our problem is, for them to tell us theirs, and finally come up with integrative solutions that are beneficial for all parties.” —Participant, from a public institution (ID=6), male.                                       | Challenge and opportunity |
|                                                         | [4]       | Q6: “For some diagnostics we report directly to the health informatics system, but we lack perhaps of articulating all the information flows more horizontally facilitating access above all the political decision-makers. Additionally, most systems are not integrated” —Participant from a                                                                                                                                                                                                                                                                                                                                                    |                           |

|                                 |     |                                                                                                                                                                                                                                                                                                                                                                                                                                                                                                                                                                                                                                                                                                                                                                                                                                                                                                                                              |                           |
|---------------------------------|-----|----------------------------------------------------------------------------------------------------------------------------------------------------------------------------------------------------------------------------------------------------------------------------------------------------------------------------------------------------------------------------------------------------------------------------------------------------------------------------------------------------------------------------------------------------------------------------------------------------------------------------------------------------------------------------------------------------------------------------------------------------------------------------------------------------------------------------------------------------------------------------------------------------------------------------------------------|---------------------------|
|                                 |     | public institution (ID=11), female.                                                                                                                                                                                                                                                                                                                                                                                                                                                                                                                                                                                                                                                                                                                                                                                                                                                                                                          | Challenge and opportunity |
|                                 | [5] | Q7: “Our legislation should regulate and control sales and consumption of antibiotics, including misuse (prohibition, e.g., colistin in veterinary in 2017). Now, it is approved the Antimicrobial Use Law, which legislates on the request of archived prescriptions, and it is stricter than the former law (only monitored required prescriptions and it had poor compliance). We believe antibiotic consumption might decrease. However, regulations are not yet standardised across country regions organically and the informal market is ample.” —Participant from a public institution (ID=6), male.                                                                                                                                                                                                                                                                                                                                 | Challenge and opportunity |
|                                 | [6] | Q8: “At the ministerial level, sometimes AMR does not receive the importance and continuity it requires. Today we have a Minister of Health to whom AMR was a priority on their political agenda and most policy attempts entails, and do not omit, reducing AMR and antibiotic misuse. It is helpful to work in favour of that, but it is not frequently the case.” —Participant from an international institution (ID=17), female.                                                                                                                                                                                                                                                                                                                                                                                                                                                                                                         | Challenge and opportunity |
| III. Antibiotics access and use | [1] | Q9: “Laboratories distribute veterinary products. Laboratories have the approval of SENASA to produce and commercialise the products, as well as the distributors. The commercialisation path is laboratory> distributor> production, through veterinarians, but sometimes is the owner himself selling and applying them due to lack of regulation on access, even over the counter. Among cattle, there is a large part of the production that is still extensive and pharmaceutical companies are often far away from feedlot farms. Hence, they keep first-aid kits, including antibiotics, which are applied to wounds or with no diagnostic or under no veterinary supervision. The law obliges establishments to have a treatment book where animal treatments and antibiotics used are recorded, but in most remote areas is not reliably fulfilled and control is limited” —Participant from an NGO linked to animals (ID=4), male. | Challenge                 |
|                                 | [2] | Q10: “I work in swine production; our main concern relies upon prophylactic consumption of the antibiotic. Indiscriminate antibiotic consumption is present in two ways within swine production. First, metaphylactic, when there is a percentage of animals that are indeed sick within the flock, but since they are living with them, it is very likely that others are incubating the disease, hence they are treated. The second is the prophylactic, where there is no sick animal, but there are factors of potential stressors that could make those animals sick. This is our biggest concern, because antibiotic is then incorporated into food, whose biological matrix restricts bioavailability of the active ingredient. Additionally, when antibiotics are applied, withdrawal times are not monitored, which promotes the development of AMR mechanisms further” —Veterinarian, academia (ID=14), male.                      | Challenge                 |
|                                 | [3] | Q11: “Laboratories producing medicines for veterinary use must comply with good manufacturing practice ‘GMP’ standards. They register the product, present all the documentation on waste, among other features. We have traceability in some products, such as ketamine, each bottle is identified and we follow-up until the final user. Laboratory production of medicines is well monitored, but there are limited regulations over usage registration, because products are not often administered by health professionals. For instance, final users do not necessarily respect the restriction period or animal treatment is incomplete, for which regulation is scarce.” —Participant from an NGO (ID=4), male.                                                                                                                                                                                                                      | Challenge                 |
|                                 | [4] | Q12: “We employ tannins, organic acids, probiotics, and prebiotics instead of antibiotics. We proved their efficacy for <i>Escherichia coli</i> and <i>Salmonella</i> using a mixture of probiotics and prebiotics in sentinel farms, which were boosted animal growth. We have produced alternative to antibiotics for a long-time including animal vaccines against pneumonia, and it was company’s initiative.” —Participant from a private company (ID=5), male.                                                                                                                                                                                                                                                                                                                                                                                                                                                                         | Opportunity               |

|                                        |     |                                                                                                                                                                                                                                                                                                                                                                                                                                                                                                                                                                                                                                                                                                                                                                                                                                                                                                                                                                                                                                                                                                                                                                                                                                                                                                                                                                                                                                    |                           |
|----------------------------------------|-----|------------------------------------------------------------------------------------------------------------------------------------------------------------------------------------------------------------------------------------------------------------------------------------------------------------------------------------------------------------------------------------------------------------------------------------------------------------------------------------------------------------------------------------------------------------------------------------------------------------------------------------------------------------------------------------------------------------------------------------------------------------------------------------------------------------------------------------------------------------------------------------------------------------------------------------------------------------------------------------------------------------------------------------------------------------------------------------------------------------------------------------------------------------------------------------------------------------------------------------------------------------------------------------------------------------------------------------------------------------------------------------------------------------------------------------|---------------------------|
| IV. AMR knowledge and awareness        | [1] | Q13: <i>“One of the main challenges is the access to information/ communication, the awareness of responsible antibiotic use, and lack of commitment from the private sector. Technical and general education on antibiotics and AMR should be promoted to help set a change of consciousness in the consumer, prescriber, and sellers by letting them know the actual effects/impacts of AMR on population health and animal businesses (among producers). The profitability of the sector is compromised if producers are not willing to pay a differential for meat production that could produce higher costs in the future if not committed.”</i> —Engineer from an NGO (ID=7), male.                                                                                                                                                                                                                                                                                                                                                                                                                                                                                                                                                                                                                                                                                                                                         | Challenge                 |
|                                        | [2] | Q14: <i>“The Argentine population is much more aware of what human health is and what antibiotics are designed for. For instance, we had the World Week of Awareness in November, and we held the AMR awareness race alongside the Ministry of Health and Sports, which exhibits interrelationships between different groups.”</i> —Participant from an international organisation (ID=17), female                                                                                                                                                                                                                                                                                                                                                                                                                                                                                                                                                                                                                                                                                                                                                                                                                                                                                                                                                                                                                                 | Challenge and opportunity |
| V. AMR surveillance                    | [1] | Q15: <i>“We created the infection surveillance program in 2004 for human hospitals, which is an essential part of national surveillance reporting the annual prevalence/incidence of most critical pathogens. A ministerial resolution from 2018 recommends establishing hospital prevention and control programs, but adherence is optional. We have more than 200 added institutions reporting the appropriate use of antimicrobials yearly, including whether it was empirical, directed, surgical prophylaxis, community-acquired infection, etc. In-hospital software, part of the National Antimicrobial Resistance Surveillance Network ‘WHONET’, clinicians load the data, compute the analyses (automatically) and feeds the information to the epidemiology department. However, since 2021 (ministerial resolution), prevention and control programs must be certified depending on international guidelines. We use a federal criterion to enrol national institutions and federal hospitals, but private organisations are poorly represented. Also, some institutions did not have stewardship programs actively functioning. We updated the last referendum to include antimicrobial stewardship as a section for infection control (2021), assigning importance to protected areas for infectious disease specialist and pharmacists within hospitals.”</i> —Participant from a public institution (ID=11), female | Challenge                 |
|                                        | [2] | Q16 <i>“We have two main problems. First, we detect and observe a lot of animal cases experiencing neonatal diarrhoea produced by multi-resistant E. coli, even encountering septicaemia, which presents a serious health problem. Secondly, we see multi-resistant bacterial strains more frequently associated with bovine’s respiratory complex. We identify bronchopneumonia or pneumonia as the two main infectious syndromes. We receive multiple samples from animal lungs, mainly originated in fattening animals in the pen or outbreaks of pneumonia. Quite predominantly, we observe the presence of bacterial resistance to a large majority of the antibiotics routinely used for treating respiratory conditions. That shows some inefficiency from fragmented production systems lacking vertical structure, reduced biosecurity, and poor vaccination rates, especially among cattle.”</i> —Veterinarian, public organisation (ID=8), male.                                                                                                                                                                                                                                                                                                                                                                                                                                                                        | Challenge                 |
|                                        | [3] | Q17: <i>“I do believe that veterinarians have a very important multisectoral role to play there as training and awareness agents to contain AMR burden.”</i> — Participant from an NGO (ID=4), male.                                                                                                                                                                                                                                                                                                                                                                                                                                                                                                                                                                                                                                                                                                                                                                                                                                                                                                                                                                                                                                                                                                                                                                                                                               | Opportunity               |
| VI. National action plan (NAP) efforts | [1] | Q18: <i>“Progress has been made if we compare it with five years ago. Regulations on the use of antibiotics to prevent their misuse, such as growth promoters, and vast existing (AMR control in animals) and new initiatives to start controlling AMR reservoirs in soil and water demonstrates we are working towards a better integrated system by taking</i>                                                                                                                                                                                                                                                                                                                                                                                                                                                                                                                                                                                                                                                                                                                                                                                                                                                                                                                                                                                                                                                                   | Opportunity               |

1  
2  
3  
4  
5  
6  
7  
8  
9  
10  
11  
12  
13  
14  
15  
16  
17  
18  
19  
20  
21  
22  
23  
24  
25  
26  
27  
28  
29  
30  
31  
32  
33  
34  
35  
36  
37  
38  
39  
40  
41  
42  
43  
44  
45  
46  
47  
48  
49  
50  
51  
52  
53  
54  
55  
56  
57  
58  
59  
60

into consideration the One Health approach”—Veterinarian, public organisation (ID=8), male.

**VII. External drivers**

- [1]\* Q19: “Something the pandemic left us was the effectiveness of virtual meetings, for example, plan out objectives and do training with the veterinarians and farm owners” —Participant from an NGO (ID=4), male. Opportunity
- [2] Q20: “We performed projects alongside the European Union, WHO and Centre for Disease Control, which supported Argentina through international funding to perform AMR surveillance and control, even in food products and wastewater.” —Participant from a public institution (ID=1), female. Opportunity

Notes: AMR= Antimicrobial resistance. † Sub-themes descriptions are found in Table 1. NGO= non-governmental organization. \*There are challenges associated as well, but we included an opportunity. CoNaCRA= National Commission for the Control of Antimicrobial Resistance. INE= National Institute of Epidemiology. INEI= National Institute of Infectious Diseases. INTA= National Agricultural Technology Institute. SENASA= National Service of Agri-food Health and Quality. WHO= World Health Organization.

*Theme III. Antibiotics*

Thematic III encompasses efforts to improve antibiotic access, consumption, and regulation, while accounting for potential alternatives. Access to antibiotics was indicated as better regulated in the human side, where hospitals and labs work collaboratively; however, a few participants expressed concerns about the applicability of mandatory prescriptions for sales and a mismatch between prescribed treatments and antibiotic package dosing:

“Antibiotics are still sold without a prescription either for human or animal use (more frequent among animals), even if prescriptions are mandatory by law, including keeping track of their usage by health professionals (electronic sales). Another issue is the dosage; antibiotics are usually sold in dosages greater than needed, which incentivises inappropriate utilisation maximising commercial interests.”— Participant, academia (ID=14), female.

In addition, one participant expressed worrying views towards antibiotic access and prophylactic use in animals and its relationship with AMR evolution, including reduced capacity for monitoring usage and withdrawal (Q10, Table 2). On the animal side, the route for antibiotic acquisition could have been more cohesive; vets do not necessarily monitor antibiotic purchase, application, and storage, and limited local regulations are in place (Q9, Table 2). Such practices can be reflected early in the regulation system and antibiotic dispensing from the first stage of the purchasing chain. Most medicines for veterinary use follow international manufacturing standards, but traceability of compounds and usage is restricted once purchase is made (Q11, Table 2). Finally, some participants working on antibiotic replacement produce alternatives for antibiotic use in food-producing animals. They were optimistic over vaccine production offering an efficacious alternative, tackling respiratory diseases in animals, and using additives and plant-based biomolecules to improve food conversion efficiency and eradicate antibiotic use as growth promoters in animal farms (Q12, Table 2).

*Theme IV. AMR knowledge and awareness*

Theme IV incorporated progress made towards AMR knowledge and awareness targeting different settings and communities. Participants were inclined to say that awareness has increased, and impacts on human health are acknowledged (Q13, Table 2), primarily among leading institutions including government, but awareness campaigns only have limited reach to the wider population, including meat producers, as they tend to be specific and attend professional needs:

“There is a problem with vets’ knowledge of antibiotics, specifically in terms of pharmacokinetic and pharmacodynamic aspects, the correct calculation of the dose administration. It is the duration of treatment in the form of clinical criteria and corresponding to specific physiological situations. All these aspects are related to rational antibiotic usage. If you forget these aspects, you can reach a therapeutic failure despite having chosen the correct antibiotic based on what the laboratory said; and this is largely prevalent in the country.”— Veterinarian, academia (ID=14), male.

Notwithstanding, participants reported initiatives to raise the human population’s awareness generally, including social events and educational seminars, having positive perceived conceptions from participants but their effectiveness remains unclear (Q14, Table 2).

*Theme V. AMR surveillance*

Theme V comprised all barriers or opportunities that made implementation of surveillance and AMR control overtime arduous or fruitful. Participants expressed that surveillance of AMR has exhibited a lot of progress overtime, especially among humans, and most recently in animals. Antibiotic stewardship and infection surveillance programs in humans, including the regular monitoring of a consolidated network of +200 hospitals, primarily public, are some of the positive views perceived by stakeholders towards implementation (Q15, Table

2). Antibiotic consumption control is a central priority of the government now and a countrywide program is being developed to strengthen AMR surveillance:

*“We have implemented a national surveillance system for the national consumption of antibiotics in humans, which we did not have until a short time ago. Now, it is time to access the information related to disaggregated statistics on antibiotic sales through collaboration with Pharmacology in human and animal side.”—Pharmacist, public organisation (ID=6), female*

However, policies around AMR surveillance and control are moving forward among livestock production systems but at slower rates. One participant indicated that testing for critical animal pathogens is routine and usually comes from public organisations. Still, animal diagnostics are difficult to access sometimes, and surveillance does not yet clearly account for different locations, species, and seasonal components:

*“INTA monitors some animal production chains, but surveillance is the primary task of SENASA, for example, in dairy, we evaluate animals experiencing a mastitis disease and track AMR and potential environmental reservoirs with technology developed locally. Another example, we detect Salmonella in animals and utilise microbiological analyses, including phenotyping and genotyping to analyse AMR and evolution, as part of surveillance routines hand by hand with SENASA. However, most surveillance comes from the governmental side, sampling seasonality is not often captured due to limited resources, the quantity of livestock farms is massively distributed throughout the country, and local producer’s veterinary diagnostics are often sent to private labs where traceability is missing.”—Veterinarian, public organisation (ID=15), male.*

Challenges identified by participants on AMR surveillance among animals are mirrored mainly in the animal industry, which constitutes many producers and actors through the production chain, making it complex to supervise (Figure 2 shows a brief description and example of cattle production based on interview content and additional sources for broader context). As reported by one participant, industry’s main challenges rely upon controlling early stages within the production chain, including improved hygiene and sanitation and vaccination strategies before animals are stressed while moving from breeding to fattening stages (Q16, Table 2).

#### *Theme VI. National action plan efforts*

All participants expressed a positive attitude towards progress made on the NAP even if it is slow. Participants agreed upon improvements, such as, the institutionalisation of CoNaCRA, recently launched law on established AMR network and surveillance (which does not depend on political will), new research centre (IMPAM) for environmental surveillance of AMR reservoirs including water, more control over companion and food-producing animals since 2015 from INTA and SENASA, and that prohibition of some antibiotics has been crucial (Q18, Table 2). Another participant highlighted its value as a premier platform for interdisciplinary engagement:

*“The NAP has significantly advanced and enhanced interdisciplinary and interdepartmental cooperation between animal and human health sectors, primarily driven by the CoNaCRA, which has facilitated knowledge sharing. However, the challenge of synchronising NAP initiatives across 24 distinct provinces in a federal system underscores the imperative for more effective inter- and intra-level cooperation—Participant from a public institution (ID=9), female.”*

#### *Theme VII. External drivers*

Theme VII comprises external factors, identified by participants, that have had a direct or indirect role affecting AMR control and surveillance. Most participants (60%) recognised that COVID-19 limited the progress of AMR control and policy due to reallocation of human, economic and other resources towards the pandemic response. For instance, one participant described it as follows:

*“Teams were absolutely overwhelmed during COVID-19, all the artillery was dedicated to diagnosis and containment of COVID. We observed an overuse of antimicrobials during these two years, which have accelerated the appearance of new AMR mechanisms and their transmissibility. At the microbiological level, pandemic lineages have appeared, which changes local epidemiology”—Infectious disease doctor, public organisation (ID=1), female.*

However, positive lessons were drawn from the pandemic, including the effectiveness of virtual meetings as an advantage of multisectoral collaboration (Q19, Table 2). Additionally, prioritisation of personal hygiene and care and hand washing was understood to be improved due to increasing awareness of communicable diseases and human health among citizens, as one participant reflected:

*“The pandemic has taught us, it’s to prioritize our personal hygiene. Hand washing and personal care help us not get sick from diseases, and if we don’t get sick, we do not require antibiotics.”—Veterinary, public organisation (ID=3), male.*

Finally, the second external factor relies upon international collaborations. Participants described solid relationships with international actors within the Americas and abroad, which has helped fund local projects for improving AMR control and surveillance (Q20, Table 2).

## **Discussion**

We employed a context and qualitative analysis to understand main gaps related to the progress of AMR control in implementing AMR policy and regulation in Argentina. Our findings revealed that overall stakeholders' perceptions towards AMR policy are positive, including development of personal relationships enabling progress, and that the NAP along with current emerging legislation are essential in formalising the first steps to a multisectoral and better integrated AMR surveillance system. Interviewees stated that main challenges on the way forward are related, but not limited to, commitment and accountability, monetary and non-monetary resources, cultural factors implying behaviour change, fragmented food-production systems, and global governance. We have summarised these below in Figure 3 in relation to whether at macro or micro level and short or long-term.

One of the most immediate short-term challenges identified by stakeholders was governance, which implied needing more accountability and resources through different AMR actors. Clearer administration systems for successful improvement and conveying AMR policies are crucial to moving forward in the AMR agenda (26, 37). Argentina's administration system is divided into provinces. Still, political decisions are highly centralised in the capital city, which hampers regulation of antibiotic access, AMR testing, and delivery of consistent access to healthcare and hospital infrastructure in humans and animals. Although the CoNaCRA has provincial representatives, the AMR agenda had limited alignment with subnational and local governments for NAP implementation posing significant challenges in rural and remote areas (38). Likewise in Brazil (20), these areas are often highly exposed to AMR risks due to health deprivation. Re-administering monetary and non-monetary resources to meet local needs and capacities and empowering provincial sentinel organisations are crucial to making AMR policies accountable.

Cross-sector coordination including animal, environmental and human sectors was highlighted as crucial by interviewees and constituted an essential element of short-term action towards tackling AMR and improve policy design. Although communication was perceived as positive due to interpersonal relations between colleagues, adequate governance must be established, including mechanisms to link organisations across sectors through formal channels to foster continuity. Effectively tackling these challenges is essential for the One Health approach, particularly given the COVID-19 pandemic's revelation of significant complexities and gaps in intersectoral collaboration, underscoring the need for integrated, human-uncentered, policies (39). Literature has focused on countries' need for better engagement and advocacy from various stakeholders (9, 14, 40). Governments, policymakers, and NGOs are essential to AMR control, supported by budgetary commitment and political authority to meet objectives (19). Current interventions in Argentina remain sector-specific, which could be attributed to differences in priorities for AMR or insufficiently well-defined roles in the NAP. Developing a monitoring or evaluation system for all implementation plans is recommended to determine policy effectiveness. Broad cross-field participation is also crucial if no public budget is allocated to address AMR nationally. Insufficient funding provided by the annual national budgets negatively impacts NAP implementation, generating more constraints on AMR action. The COVID-19 pandemic garnered global attention disrupting national resources and health services that were indirectly assigned to AMR control, and reallocating those funds has posed challenges to AMR reduction measures. One Health although theoretically a useful framework, was not considered in NAP implementation—it could have accounted for the co-benefits of addressing both risks concurrently. That is why the United Nations Environment Program (UNEP) established the Multi-partner Trust Fund (MPTF) to help LMICs improve delivery of multisectoral NAPs (28).

AMR awareness has increased overtime in Argentina. Recent efforts have included various seminars and activities, including a long-distance foot race to spread the word on AMR (41). However, AMR comprises stakeholders with diverse comprehension of the AMR phenomenon, and we evidenced a mismatch between scientific and non-scientific domains, including general public. Social change promoting human health via shifts in society's behaviour should be prioritised to ensure the sustainability of human development and their environments (42). For instance, public engagement is overlooked in Argentina's NAP. Strategies to evaluate attitudes, behaviours, necessities, and practices of socioeconomically and culturally diverging communities, drawing particular attention to those most vulnerable to AMR infections, are crucial to design public health interventions to combat AMR (4).

Strengthening AMR surveillance and control is vital, with different challenges depending on the species spectrum, as highlighted previously in LMICs (4, 19, 20, 43-45). In humans, laboratory surveillance has been based for decades on the connectivity of a well-established hospital networks (e.g., WHONET-Argentina (46)), which has helped monitor AMR locally with institutionalised IPC policies, led by the Antimicrobial Agents Division of INEI-ANLIS, the National and Regional Reference Laboratory for AMR, and the National Hospital Infection Surveillance Program (VIDHA), respectively. However, there are still gaps regarding the effectiveness of preserving antibiotics through stewardship programs, although consumption levels and inappropriate usage

1  
2  
3 423 rates decreased before COVID-19 (47). Yet, quality control among stewardship programs, antimicrobial sales  
4 424 with necessary prescriptions, and targeted local efforts in differing regions are still challenging throughout the  
5 425 country (48). In animals, the main surveillance challenges that were reported were concentrated around the  
6 426 unification of production systems (dispersed via multiple chains and actors potentially favouring the  
7 427 dissemination of AMR), whose current fragmented status hampers regulation, with differing control levels  
8 428 depending upon animal species. Systems' capacity to ensure prescription and consumption data is compromised  
9 429 and policies should coordinate and harmonise AMR surveillance while regulating the usage of antimicrobials in  
10 430 animal production at all production stages (32). Globally, antimicrobial stewardship by farm owners and health  
11 431 professionals (e.g., veterinarians) is relatively weak within agricultural systems; developing efforts towards  
12 432 stewardship programs in veterinary services, bolstering the veterinary role as a critical change agent, and  
13 433 companion animal practice remains crucial (49-51). Argentina's chambers of producers play an active role in  
14 434 agglomerating food producers and understanding their needs (e.g., Camara Argentina de Feedlots); their job  
15 435 should be directed towards better integration and prioritisation of educational services and improved production  
16 436 standards.

17 437  
18 438 A recent WHO report on integrated surveillance of AMR in foodborne diseases indicated that ineffective public  
19 439 health AMR surveillance systems often lack broader regulation and laboratory infrastructure, limited  
20 440 biosecurity, and inadequate data management capacity at government levels (52). We observed reduced capacity  
21 441 for data monitoring and sharing among animal stakeholders, whereby surveillance of antibiotic sales/usage and  
22 442 AMR rates by animal species could be better reported. Despite limited public control due to fragmentation of  
23 443 the production chain, food producers are perceived to prioritise profitability and local needs, regardless of the  
24 444 effects of AMR on population health. Moreover, creating an integrated One-Health approach combining animal  
25 445 and human systems, including environmental sources, might help reduce the AMR burden and prevent animal  
26 446 infections in farming communities (25, 53), ensuring sustainability over time and lowering the risks associated  
27 447 with political shifts and global uncertainties. The role of the private sector, not only restricted to food producers,  
28 448 in supporting AMR surveillance should be encouraged to provide a holistic whole-system integration, including  
29 449 a whole food-chain approach (54, 55). This should involve data access and optimising contemporary treatments  
30 450 and diagnostics through more research and technology to elucidate the transmission pathways of the most  
31 451 critical microorganisms for animal and human health.

32 452  
33 453 We identified potential opportunities that could help contribute to progressing action to reduce AMR locally.  
34 454 Most stakeholders favoured agricultural non-antimicrobial drug products as an antibiotic replacement for animal  
35 455 growth promoters. Using tannins and natural plant-based medicines could supersede antibiotics, reducing  
36 456 selective pressure and AMR burden (56, 57). Nevertheless, most of these products are difficult to access locally  
37 457 with limited legislation and high reliance on a few international companies. The provision of replacement routes  
38 458 from the government for antibiotic-free additives usage in animals, including appropriate stakeholder education  
39 459 and countrywide support through public pharmacies, is something the authorities should leverage. Furthermore,  
40 460 the new law establishing the AMR agenda as a constituted program, regardless of political change, presents  
41 461 substantial progress towards national recognition of the AMR problem (24). The initiative brings a long-term  
42 462 perspective to AMR policy, which could be used for the creation of an AMR policy database containing  
43 463 information on NAP implementation accountability and cross-species and environment AMR surveillance for  
44 464 policy advisors.

45 465  
46 466 Our study has some shortcomings. First, we were not able to speak to stakeholders from all areas of the  
47 467 stakeholder mapping and cannot generalise the views of participants to others but have confidence in the  
48 468 transferability of findings and common themes that arose among the diverse stakeholders who participated.  
49 469 Nevertheless, common themes arose from speaking to a range of stakeholders and our sample reached saturation  
50 470 with a narrow range of interviews, considered an appropriate sample size for qualitative research (58). Second,  
51 471 we could not represent private hospitals for human AMR, and differences between production chains, including  
52 472 a broader scope of animal species, dairy products, and final animal product providers, which remains a future  
53 473 study. Third, the extent of interviewees' actual involvement in AMR policies differed; however, we ensured  
54 474 respondents best authority through collaborative local work and expert knowledge. Fourth, the authorship group  
55 475 includes people involved in AMR policy in Argentina which could either favour (facilitate information flow) or  
56 476 bias (sampling, selection and confounding) our study results.

57 477  
58 478 Finally, participants' beliefs (interviews held between December 2022 and January 2023) might be subject to  
59 479 change in the forthcoming years due to implementation of the newly introduced national law on AMR  
60 480 prevention and control (August 2022) (24). Tighter measures regarding antibiotic usage and sales (only under-  
61 481 filled prescriptions) and promoting the One Health approach via implementing cross-sector policies while

482 accounting for organisation-specific responsibilities for their listed tasks are examples of the expected outcomes  
483 the law might enforce.

## 485 CONCLUSION

487 Our study results draw attention to the main strengths, opportunities, and challenges in the process towards  
488 improved AMR awareness, control, and surveillance across the human-animal frontier in Argentina. The  
489 country has been one of the leaders in the region with an established AMR surveillance network for human  
490 health in the latest 40 years. However, AMR governance requires a multidisciplinary focus to help stakeholders  
491 at all levels deal with knowledge uncertainties and resulting differences in framing the AMR problem. We found  
492 critical areas that should be strengthened, including accountability, sustainable engagement, integrity and equity,  
493 socio-behavioural change, international cooperation, and consolidation of environmental and animal  
494 departments. Cross-cutting interventions incorporating these areas through different One Health domains should  
495 be accounted for if progressing towards AMR is noted. The recent law on AMR prevention and control serves as  
496 a good example, which identifies potential pathways to overcome challenges with direct implications for LMICs  
497 in the Latin American region.

499 **Funding:** This research is co-funded by the UK Department of Health and Social Care as part of the Global  
500 AMR Innovation Fund (GAMRIF)(BB/T004452/1) and includes funding under the GAMRIF  
501 UK:Argentina AMR Pan-Programme Integration Project (PPIP). This is a UK aid programme that  
502 supports early-stage innovative research in underfunded areas of antimicrobial resistance (AMR) research and  
503 development for the benefit of those in low- and middle-income countries (LMICs), who bear the greatest  
504 burden of AMR. The views expressed in this publication are those of the author(s) and not necessarily those of  
505 the UK Department of Health and Social Care.

507 **Role of the funding sources:** The funders had no role in the design, conduct, analysis or interpretation of the  
508 study.

510 **Acknowledgments:** All authors attest they meet the ICMJE criteria for authorship and have reviewed and  
511 approved the final article. The authors are grateful to all participants for volunteering time as part of interviews  
512 and workshops.

514 **Conflicts of Interest:** The authors declare no conflict of interests.

516 **Author Contributions:** Conceptualization (KA, EP, WG, MF-M, AP); methodology (KA, EP, LBoden); formal  
517 analysis (KA); writing—original draft preparation (KA); writing—review, editing and commenting (KA, EP, WG,  
518 MF-M, AP, LBoden, LBarcelona, AC, FL); supervision (EP, MF-M, AP); securing funding for the project (RL,  
519 SG, SS-B, AP, MF-M, KR, HW, PD, DM, WG). All authors have read and approved the final version of the  
520 manuscript.

522 **Data availability:** The qualitative data underlying this article are available in the article.

524 **Ethics review:** Ethical approval was obtained from the Human Ethical Review Committee at University of  
525 Edinburgh (Ref: HERC\_696\_21, date of approval: 21April 2022).

### 527 AMR policy research group Argentina:

528 Rodolfo Luzbel de la Sota. *Facultad de Ciencias Veterinarias, Universidad Nacional de la Plata, Argentina.*  
529 Sonia Gómez. *Servicio Antimicrobianos, Instituto Nacional de Enfermedades Infecciosas, ANLIS “Dr Carlos G.  
530 Malbrán”, Buenos Aires, Argentina.*  
531 Sergio Sánchez Bruni. *Facultad de Ciencias Veterinarias, Universidad Nacional del Centro de la Provincia de  
532 Buenos Aires, Argentina.*  
533 Kristen Reyher. *Bristol Veterinary School, University of Bristol, UK.*  
534 Helen West Helen. *University of Nottingham, UK.*  
535 Peers Davies. *Institute of Infection, Veterinary and Ecological Sciences, Liverpool University, UK.*  
536 Dominic Moran. *The Royal (Dick) School of Veterinary Studies, University of Edinburgh, UK.*  
537



## 538 Abbreviations

539 AMR= Antimicrobial resistance  
 540 SENASA= Argentina's National Food Safety and Quality Service  
 541 ANLIS= Argentina's National Administration of Laboratories and Institutes of Health  
 542 CoNaCRA= Argentina's National Commission for the Control of Antimicrobial Resistance  
 543 INTA= Argentina's National Agricultural Technology Institute  
 544 IMPaM= Argentina's Institute for Research in Medical Microbiology and Parasitology  
 545 UBA= Universidad de Buenos Aires  
 546 INE= Argentina's National Institute of Epidemiology  
 547 INEI= Argentina's National Institute of Infectious Diseases  
 548 ANMAT= Argentina's National Administration of Drugs, Food and Medical Devices  
 549 CONICET= Argentina's National Scientific and Technical Research Council  
 550 FAO= Food and Agriculture Organization  
 551 WOA= World Organization of Animal Health  
 552 WHO= World Health Organization  
 553 PAHO= Pan American Health Organization  
 554 NAP= National Action Plan

556 **Figure 1.** Stakeholders within the human and food-producing animal interfaces for the implementation of the  
 557 NAP for the control of AMR in Argentina. Notes: Organisations abbreviations are provided in the abbreviations subtitle.  
 558 CoNaCRA= National Commission for the Control of Antimicrobial Resistance. All information on Government's ministries and structures  
 559 is available in <https://www.argentina.gob.ar/organismos>.

561 **Figure 2.** Brief description of some features within the cattle industry in Argentina. Notes: (A): Feed supplied in the  
 562 trough for cattle, livestock farm, Buenos Aires, Argentina. (B): Cattle pens, livestock farm, Buenos Aires, Argentina. (C):  
 563 Characteristics of beef production and relationship with AMR control. AMR= Antimicrobial resistance. NAP= National  
 564 action plan. Most information was derived from our interviews; exact quotes are shown upon request.

566 **Figure 3.** Major challenges and opportunities related to AMR policy in Argentina within a One Health scope in  
 567 the short and long-term. Notes: AMR= Antimicrobial resistance.

## 570 REFERENCES

- 571 1. Holmes AH, Moore LS, Sundsfjord A, Steinbakk M, Regmi S, Karkey A, et al. Understanding the  
 572 mechanisms and drivers of antimicrobial resistance. *The Lancet*. 2016;387(10014):176-87.
- 573 2. Murray CJ, Ikuta KS, Sharara F, Swetschinski L, Aguilar GR, Gray A, et al. Global burden of bacterial  
 574 antimicrobial resistance in 2019: a systematic analysis. *The Lancet*. 2022.
- 575 3. Allel K, Day L, Hamilton A, Lin L, Furuya-Kanamori L, Moore CE, et al. Global antimicrobial-  
 576 resistance drivers: an ecological country-level study at the human-animal interface. *The Lancet Planetary*  
 577 *Health*. 2023;7(4):e291-e303.
- 578 4. Charani E, Mendelson M, Pallett SJ, Ahmad R, Mpundu M, Mbamalu O, et al. An analysis of existing  
 579 national action plans for antimicrobial resistance—gaps and opportunities in strategies optimising antibiotic use  
 580 in human populations. *The Lancet Global Health*. 2023;11(3):e466-e74.
- 581 5. Mendelson M, Matsoso MP. The World Health Organization global action plan for antimicrobial  
 582 resistance. *SAMJ: South African Medical Journal*. 2015;105(5):325-.
- 583 6. Humphreys G, Fleck F. United Nations meeting on antimicrobial resistance. *World Health*  
 584 *Organization Bulletin of the World Health Organization*. 2016;94(9):638.
- 585 7. Commission E. A European one health action plan against antimicrobial resistance (AMR). European  
 586 Commission. 2017.
- 587 8. World Health Organization. Library of AMR national action plans 2023 [Available from:  
 588 [https://www.who.int/teams/surveillance-prevention-control-AMR/national-action-plan-monitoring-](https://www.who.int/teams/surveillance-prevention-control-AMR/national-action-plan-monitoring-evaluation/library-of-national-action-plans)  
 589 [evaluation/library-of-national-action-plans](https://www.who.int/teams/surveillance-prevention-control-AMR/national-action-plan-monitoring-evaluation/library-of-national-action-plans).  
 590
- 591 9. Frumence G, Mboera LE, Sindato C, Katale BZ, Kimera S, Metta E, et al. The governance and  
 592 implementation of the National Action Plan on Antimicrobial Resistance in Tanzania: a qualitative study.  
 593 *Antibiotics*. 2021;10(3):273.
- 594 10. Wernli D, Jørgensen PS, Harbarth S, Carroll SP, Laxminarayan R, Levrat N, et al. Antimicrobial  
 595 resistance: the complex challenge of measurement to inform policy and the public. *PLoS Medicine*.  
 596 2017;14(8):e1002378.

- 1  
2  
3 597 11. Organization WH. Monitoring and evaluation of the global action plan on antimicrobial resistance:  
4 598 framework and recommended indicators. 2019.
- 5 599 12. Jimah T, Ogunseitan O. National Action Plan on Antimicrobial Resistance: stakeholder analysis of  
6 600 implementation in Ghana. *Journal of Global Health Reports*. 2020;4:e2020067.
- 7 601 13. Khan MS, Durrance-Bagale A, Mateus A, Sultana Z, Hasan R, Hanefeld J. What are the barriers to  
8 602 implementing national antimicrobial resistance action plans? A novel mixed-methods policy analysis in  
9 603 Pakistan. *Health policy and planning*. 2020;35(8):973-82.
- 10 604 14. Chua AQ, Verma M, Hsu LY, Legido-Quigley H. An analysis of national action plans on antimicrobial  
11 605 resistance in Southeast Asia using a governance framework approach. *The Lancet Regional Health-Western  
12 606 Pacific*. 2021;7:100084.
- 13 607 15. Harant A. Assessing transparency and accountability of national action plans on antimicrobial  
14 608 resistance in 15 African countries. *Antimicrobial Resistance & Infection Control*. 2022;11(1):1-15.
- 15 609 16. Nair M, Zeegers M, Varghese G, Burza S. India's National Action Plan on Antimicrobial Resistance: a  
16 610 critical perspective. *Journal of Global Antimicrobial Resistance*. 2021;27:236-8.
- 17 611 17. Amin ET, Omeichu AA, Shu DM, Ekome SRE, Njumkeng C, van der Sande MAB. Control of  
18 612 antimicrobial resistance in Cameroon: Feasibility of implementing the National Action Plan. *Tropical Medicine  
19 613 & International Health*. 2021;26(10):1231-9.
- 20 614 18. Patel J, Harant A, Fernandes G, Mwamelo AJ, Hein W, Dekker D, et al. Measuring the global response  
21 615 to antimicrobial resistance, 2020–21: a systematic governance analysis of 114 countries. *The Lancet Infectious  
22 616 Diseases*. 2023.
- 23 617 19. Shabangu K, Essack SY, Duma SE. Barriers to Implementing National Action Plans on Antimicrobial  
24 618 Resistance using a One Health Approach: Policy-Makers' Perspectives from South Africa and Eswatini. *Journal  
25 619 of Global Antimicrobial Resistance*. 2023.
- 26 620 20. Juliana Silva Corrêa LFZ, Roberto Rubem Da Silva-Brandão, Sandi Michele de Oliveira, Lislaine  
27 621 Aparecida Fracolli, Maria Clara Padoveze & Gloria Cordoba. The governance of antimicrobial resistance in  
28 622 Brazil: Challenges for developing and implementing a one health agenda. *Global Public Health*.  
29 623 2023;18(2190381).
- 30 624 21. da Silva Jr JB, Espinal M, Ramón-Pardo P. Antimicrobial resistance: Time for action. *Revista  
31 625 Panamericana de Salud Pública*. 2020;44.
- 32 626 22. Ministry of Health. National strategy for the Control of Antimicrobial resistance 2015 [Available from:  
33 627 <https://www.boletinoficial.gob.ar/pdf/linkQR/YzB6b2o4Qy9ZRDFycmZ0RFhoUThyQT09>].
- 34 628 23. República Argentina - Poder Ejecutivo Nacional. Resolución 22/19. Productos veterinarios:  
35 629 prohibición de elaboración, distribución, importación, uso y tenencia 2019 [updated 11 January 2019. Available  
36 630 from:  
37 631 [http://www.senasa.gob.ar/sites/default/files/ARBOL\\_SENASA/INFORMACION/NORMATIVA/RESOL\\_Y\\_A\\_NEXOS/2019/r\\_senasa\\_22-2019.pdf](http://www.senasa.gob.ar/sites/default/files/ARBOL_SENASA/INFORMACION/NORMATIVA/RESOL_Y_A_NEXOS/2019/r_senasa_22-2019.pdf)].
- 38 632 24. Nacion ANCPdl. Boletín oficial de la republica de Argentina. Ley de prevención y control de la  
39 633 resistencia a los antimicrobianos, ley 27680. 2022 [updated August, 2022. Available from:  
40 634 [www.boletinoficial.gob.ar/detalleAviso/primera/270118/20220824?busqueda=1](http://www.boletinoficial.gob.ar/detalleAviso/primera/270118/20220824?busqueda=1) ).
- 41 635 25. Ogyu A, Chan O, Littmann J, Pang HH, Lining X, Liu P, et al. National action to combat AMR: a One-  
42 636 Health approach to assess policy priorities in action plans. *BMJ global health*. 2020;5(7):e002427.
- 43 637 26. Anderson M, Schulze K, Cassini A, Plachouras D, Mossialos E. A governance framework for  
44 638 development and assessment of national action plans on antimicrobial resistance. *The Lancet Infectious  
45 639 Diseases*. 2019;19(11):e371-e84.
- 46 640 27. Pitchforth E, Smith E, Taylor J, Davies S, Ali G-C, d'Angelo C. Global action on antimicrobial  
47 641 resistance: lessons from the history of climate change and tobacco control policy. *BMJ Global Health*.  
48 642 2022;7(7):e009283.
- 49 643 28. United Nations. Antimicrobial Resistance Multi-Partner Trust Fund  
50 644 Countering antimicrobial resistance with a 'One Health' approach 2022 [Available from:  
51 645 <https://mptf.undp.org/fund/amr00>].
- 52 646 29. World Bank. World Bank Data 2023 [Available from: <https://data.worldbank.org/country/argentina>].
- 53 647 30. Ministry of Health. Comisión Nacional de Control de la Resistencia Antimicrobiana (CoNaCRA) 2024  
54 648 [Available from: <https://www.argentina.gob.ar/salud/epidemiologiaysituacion/conacra>].
- 55 649 31. Instituto Nacional de Enfermedades Infecciosas (INEI) – ANLIS “DR. CARLOS G. MALBRAN.  
56 650 Servicio Antimicrobianos 2024 [Available from: <http://antimicrobianos.com.ar/servicio-antimicrobianos>].
- 57 651 32. McCormick BP, Quiroga MP, Álvarez VE, Centrón D, Tiltonell P. Antimicrobial resistance  
58 652 dissemination associated with intensive animal production practices in Argentina: A systematic review and  
59 653 meta-analysis. *Revista Argentina de Microbiología*. 2022;55(1):25-42.
- 60 654 33. Temple B, Young A. Qualitative research and translation dilemmas. *Qualitative research*.  
61 655 2004;4(2):161-78.

- 1  
2  
3 657 34. Braun V, Clarke V. Using thematic analysis in psychology. *Qualitative research in psychology*.  
4 658 2006;3(2):77-101.
- 5 659 35. Boeije H. A purposeful approach to the constant comparative method in the analysis of qualitative  
6 660 interviews. *Quality and quantity*. 2002;36(4):391-409.
- 7 661 36. Tong A, Sainsbury P, Craig J. Consolidated criteria for reporting qualitative research (COREQ): a 32-  
8 662 item checklist for interviews and focus groups. *International journal for quality in health care*. 2007;19(6):349-  
9 663 57.
- 10 664 37. Rochford C, Sridhar D, Woods N, Saleh Z, Hartenstein L, Ahlawat H, et al. Global governance of  
11 665 antimicrobial resistance. *The Lancet*. 2018;391(10134):1976-8.
- 12 666 38. Pokharel S, Raut S, Adhikari B. Tackling antimicrobial resistance in low-income and middle-income  
13 667 countries. *BMJ Specialist Journals*; 2019. p. e002104.
- 14 668 39. Chen J, He J, Bergquist R. Challenges and response to pandemics as seen in a One Health perspective.  
15 669 *Science in One Health*. 2022;1:100010.
- 16 670 40. Castro-Sanchez E, Iwami M, Ahmad R, Atun R, Holmes AH. Articulating citizen participation in  
17 671 national anti-microbial resistance plans: A comparison of European countries. *European Journal of Public*  
18 672 *Health*. 2018;28(5):928-34.
- 19 673 41. With a massive race, PAHO Argentina spreads the word to prevent antimicrobial resistance [press  
20 674 release]. 2022.
- 21 675 42. Hernando-Amado S, Coque TM, Baquero F, Martínez JL. Antibiotic resistance: moving from  
22 676 individual health norms to social norms in one health and global health. *Frontiers in Microbiology*.  
23 677 2020;11:1914.
- 24 678 43. Lota MMM, Chua AQ, Azupardo K, Lumangaya C, Reyes KAV, Villanueva SYAM, et al. A  
25 679 Qualitative Study on the Design and Implementation of the National Action Plan on Antimicrobial Resistance in  
26 680 the Philippines. *Antibiotics*. 2022;11(6):820.
- 27 681 44. Sirijatuphat R, Chayangsu S, Srisompong J, Ruangkriengsin D, Thamlikitkul V, Tiengrim S, et al.  
28 682 Feasibility, Challenges, and Benefits of Global Antimicrobial Resistance Surveillance System Implementation:  
29 683 Results from a Multicenter Quasi-Experimental Study. *Antibiotics*. 2022;11(3):348.
- 30 684 45. Sumpradit N, Wongkongkathep S, Poonpolsup S, Janejai N, Paveenkittiporn W, Boonyarit P, et al.  
31 685 New chapter in tackling antimicrobial resistance in Thailand. *bmj*. 2017;358.
- 32 686 46. Rossi MA, Tokumoto M, Couto E, Di Bella A, Alstchuler M, Gomez N, et al. Survey of the levels of  
33 687 antimicrobial resistance in Argentina: WHONET program-1991 to 1994. *International journal of antimicrobial*  
34 688 *agents*. 1995;6(2):103-10.
- 35 689 47. Dapás JI, Quirós RE. Antimicrobial stewardship in low-and middle-income countries. *Current*  
36 690 *Treatment Options in Infectious Diseases*. 2018;10:17-27.
- 37 691 48. Boni S, Marin GH, Campaña L, Marin L, Corso A, Risso-Patron S, et al. Disparities in antimicrobial  
38 692 consumption and resistance within a country: the case of beta-lactams in Argentina. *Revista Panamericana de*  
39 693 *Salud Pública*. 2021;45:e76.
- 40 694 49. Brodbelt D. Breaking new ground in antimicrobial stewardship in companion animal veterinary  
41 695 practice. *Nature Communications*. 2021;12(1):2445.
- 42 696 50. Nind L. International trends impacting antimicrobial stewardship in animal health. *Australian*  
43 697 *veterinary journal*. 2019;97(9):362-4.
- 44 698 51. Singleton DA, Rayner A, Brant B, Smyth S, Noble P-JM, Radford AD, et al. A randomised controlled  
45 699 trial to reduce highest priority critically important antimicrobial prescription in companion animals. *Nature*  
46 700 *Communications*. 2021;12(1):1593.
- 47 701 52. World Health Organization. Integrated surveillance of antimicrobial resistance in foodborne bacteria:  
48 702 application of a one health approach: guidance from the WHO Advisory Group on Integrated Surveillanec of  
49 703 Antimicrobial Resistance (AGISAR). 2017.
- 50 704 53. Jimenez CEP, Keestra SM, Tandon P, Pickering AJ, Moodley A, Cumming O, et al. One Health  
51 705 WASH: an AMR-smart integrative approach to preventing and controlling infection in farming communities.  
52 706 *BMJ Global Health*. 2023;8(3):e011263.
- 53 707 54. Mendelson M. BSAC Vanguard Series: Inequality and antibiotic resistance. *Journal of Antimicrobial*  
54 708 *Chemotherapy*. 2022;77(2):277-8.
- 55 709 55. Blake LJ, Häslar B, Bennani H, Mateus AL, Eastmure E, Mays N, et al. The UK Antimicrobial  
56 710 Resistance Strategy 2013–18: A Qualitative Study of International and Domestic Policy and Action Related to  
57 711 Livestock and the Food Chain. *Frontiers in Sustainable Food Systems*. 2022;6:102.
- 58 712 56. Huang Q, Liu X, Zhao G, Hu T, Wang Y. Potential and challenges of tannins as an alternative to in-  
59 713 feed antibiotics for farm animal production. *Animal Nutrition*. 2018;4(2):137-50.
- 60 714 57. Farha AK, Yang Q-Q, Kim G, Li H-B, Zhu F, Liu H-Y, et al. Tannins as an alternative to antibiotics.  
715 *Food Bioscience*. 2020;38:100751.

1  
2  
3 716 58. Hennink M, Kaiser BN. Sample sizes for saturation in qualitative research: A systematic review of  
4 717 empirical tests. *Social Science & Medicine*. 2022;292:114523.  
5 718  
6  
7  
8  
9  
10  
11  
12  
13  
14  
15  
16  
17  
18  
19  
20  
21  
22  
23  
24  
25  
26  
27  
28  
29  
30  
31  
32  
33  
34  
35  
36  
37  
38  
39  
40  
41  
42  
43  
44  
45  
46  
47  
48  
49  
50  
51  
52  
53  
54  
55  
56  
57  
58  
59  
60

For peer review only

1  
2  
3  
4  
5  
6  
7  
8  
9  
10  
11  
12  
13  
14  
15  
16  
17  
18  
19  
20  
21  
22  
23  
24  
25  
26  
27  
28  
29  
30  
31  
32  
33  
34  
35  
36  
37  
38  
39  
40  
41  
42  
43  
44  
45  
46  
47  
48  
49  
50  
51  
52  
53  
54  
55  
56  
57  
58  
59  
60



379x210mm (144 x 144 DPI)

1  
2  
3  
4  
5  
6  
7  
8  
9  
10  
11  
12  
13  
14  
15  
16  
17  
18  
19  
20  
21  
22  
23  
24  
25  
26  
27  
28  
29  
30  
31  
32  
33  
34  
35  
36  
37  
38  
39  
40  
41  
42  
43  
44  
45  
46  
47  
48  
49  
50  
51  
52  
53  
54  
55  
56  
57  
58  
59  
60

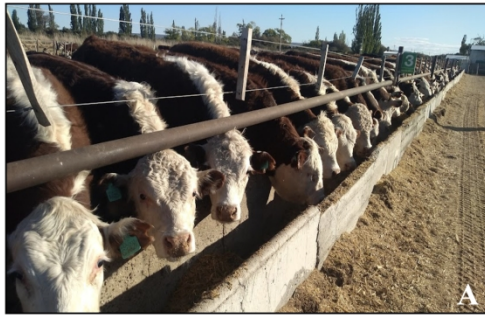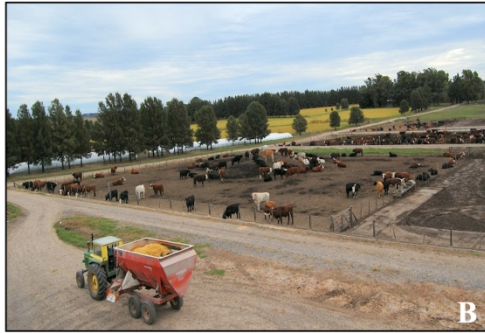

Around 52 million head of cattle are kept by livestock farmers in Argentina. The country produced 3.2 million tonnes of beef meat in 2020, of which 900,001 tonnes were exported (75% to China). However, the production chain involves a wide variety of actors and producers (from breeding, fattening, slaughtering, preservation, and sale) and the number of direct beef producers is estimated to be 230,000 with no significant market share among specific companies, compared to chicken or swine industries where three companies concentrate 70% of the market share. Although swine and chicken are amongst food-producing animals species with higher AMR rates for streptomycin, ampicillin and tetracycline resistance, there is still a research gap regarding beef-cattle from feedlots due to reduced AMR monitoring and control, including antibiotic usage. The cattle production chain is highly fragmented, and the movement dynamics of the animals through the production chain are complex, even though their transit must be registered to comply with SENASA guidelines, and all production units should be referenced in a computer database. However, in practicality, controlling thousands of animals at different production stages is challenging, and it is often hard to trace and follow to check if producers follow guidance in antibiotic use. In line with this, cattle vaccination rates against diarrheal or respiratory diseases are relatively low compared to the chicken and swine industry. Most livestock farms are family businesses where there is a partial vet role for antibiotic administration, and antibiotic storage in warehouses is often observed due to reduced control on acquisition.

437x291mm (144 x 144 DPI)

1  
2  
3  
4  
5  
6  
7  
8  
9  
10  
11  
12  
13  
14  
15  
16  
17  
18  
19  
20  
21  
22  
23  
24  
25  
26  
27  
28  
29  
30  
31  
32  
33  
34  
35  
36  
37  
38  
39  
40  
41  
42  
43  
44  
45  
46  
47  
48  
49  
50  
51  
52  
53  
54  
55  
56  
57  
58  
59  
60



441x232mm (144 x 144 DPI)

## Supplementary Material

Opportunities and challenges in antimicrobial resistance policy including animal production systems and humans across stakeholders in Argentina: a context and qualitative analysis

### Table of Contents

|                                                                                                                          |    |
|--------------------------------------------------------------------------------------------------------------------------|----|
| I. Timeline containing the legislation and policies in place within the AMR spectrum in Argentina.....                   | 2  |
| II. Summary of the Argentinian National Action Plan to combat AMR .....                                                  | 4  |
| III. Consent form for interviewees (participants) .....                                                                  | 8  |
| IV. Participant information sheet.....                                                                                   | 9  |
| V. Participant interview topic guide .....                                                                               | 11 |
| VI. Description of main preliminary topic codes applied to the interview analyses and their respective definitions ..... | 13 |
| VII. Themes ordered from broader to greater specificity. ....                                                            | 14 |
| VIII. Packed code cloud for identified themes/sub-themes .....                                                           | 15 |



## I. Timeline containing the legislation and policies in place within the AMR spectrum in Argentina

[1916] Creation of the formerly called Instituto Nacional de Microbiología “Malbran”, which is renamed in 1996 (see below).

[1956] Creation of the National Agricultural Technology Institute (INTA)

[1964] Act. 19 of the National Law of Medications No. 16,463. It states that "any form of advertising of products whose sale has not been authorized by prescription is prohibited" (subsection d).

[1967] National law regulating pharmaceutical activity. Also, the Directorate of Registration Inspection and Border Health of the Ministry of Health of the Nation, which upon verifying the violations of the regulations must initiate the corresponding summary actions and may conclude with the sanctions established in art. 45 of Law 17565 on the Exercise of Pharmacy Activity: warning, fine, closure of the establishment, suspension of registration and/or disqualification.

[1969] Decree number 3835/1969 of the Ministry of Public Health established that medicines with antibiotic activity for systemic use must be dispensed under a prescription filed by the dispenser, with penalties for non-compliance with: warning, fine, closure, suspension of registration, disqualification and /or prison of up to three years (Laws 17565/[1967](#) of Practice of Pharmacy and 26524/2009 of the Penal Code)

[1970] Decree number 3835/69 (later modified by decree number 378/70) of the then Ministry of Social Welfare. It established that medicines whose active pharmaceutical ingredients (IFAs) have antibiotic activity for systemic use must be dispensed according to their registration condition of January 1, 1970. Prescriptions must be archived by correlative date and kept for a period of two years, after which the pharmacy can delete them.

[1983] Creation of the National program of epidemiology and control of hospital-acquired infections, which was implemented and monitored by the National Institute of Epidemiology (INE), decree number 2885/83.

[1986] Creation of the National Antimicrobial Resistance Surveillance Network WHONET-Argentina

[1992] Creation of the National Administration of Medicines, Food and Medical Technology (ANMAT)

[1995] Creation of the Intensified National Epidemiological Surveillance System for Hospital Infections (SIVENIH), implemented on a pilot basis and involving 25 public and private hospitals in the country.

[1996] Creation of the National Administration of Laboratories and Institutes of Health (ANLIS), decree number 1628.

[1998] Creation of the National Service of Agri-food Health and Quality (SENASA)

[2001] Creation of the Argentine Beef Promotion Institute (IPCVA), law number 25,507.

[2004] Creation of the National Hospital Infection Surveillance Program (VIHDA) to monitor hospital-acquired infections in participating hospitals.

[2007] Decree number 609 states that antimicrobials must be sold only under prescription.

[2009] Law 26,524. The dispensation of any type of medicinal product without compliance with the legal conditions of sale would be considered as a crime, which can be punished with prison for up to three years.

[2011] Decree number 666/2011 determined that any establishments having food-producing animals must keep a record book for the administration of veterinary products, subject to inspections.

[2011] Decree number 666 determined that the food-producing establishments must keep a record book of treatments subject to inspection by SENASA in which all administration of veterinary products on production animals must be recorded.

1  
2  
3  
4 [2011] Act. 36 of Decree 7123/68, regulating Law 17,565, defined that: “The acquisition and sales provided by  
5 drugstores must be made by invoice and/or separate remittance..., keeping the Documentation filed in an orderly  
6 manner, making it available to the inspectors of the Secretary of State for Public Health, at their request.  
7

8 [2011-2013] ANMAT drug traceability programs (decree number 435, National Ministry of Health) and  
9 SENASA phytosanitary and veterinary products (SENASA, decree number 369/2013), will provide data on the  
10 commercialization and distribution of antimicrobials in humans and in food-producing animals and agriculture.  
11

12 [2013] Decree number 369/2013 created the Traceability System for Phytosanitary and Veterinary Products.  
13

14 [2013] SENASA instituted the National Phytosanitary and Veterinary Products Traceability System, which  
15 reports the volume and type of antimicrobials being marketed within the veterinary products framework for  
16 commercialization. This online system involves all the parts from the commercial chain; including the  
17 manufacturer or importer of the product to the veterinarian who indicates and sells it. In this way, every time a  
18 sale is made, the seller must declare what he sold, and the buyer who accepted the sale and who assumes  
19 responsibility for the possession of the products purchased.  
20

21 [2015] Decree number 834/2015 y 391/2015. Creation of the National Action plan for the surveillance,  
22 prevention and control of antimicrobial resistance (June) in line with the creation of the national commission for  
23 the control of antimicrobial resistance (CoNaCRA).  
24

25 [2015] Decree number 591. Creation of the National Plan for the surveillance of AMR in food-producing  
26 animals (November)  
27

28 [2015] Decree number 594/2015 prohibited the inclusion of antimicrobials in animal feed. This latest regulation  
29 points to the total prohibition (in 2019) of the use of antimicrobials as promoters of animal growth.  
30

31 [2015] The National Administration of Medicines, Food and Medical Technology (ANMAT) states that the  
32 pharmaceutical labelling of antimicrobials must agree with the usual doses and treatments duration (decree  
33 number 7,130).  
34

35 [2019] SENASA states that the manufacture, distribution, import, use and possession of veterinary products  
36 containing colistin is banned from veterinary products/medicine (Decree reference: EE 54429573/2018).  
37

38 [2022] Antimicrobial resistance prevention and control law (number 27680). National statement on establishing  
39 the appropriate mechanisms to promote and control antimicrobial resistance in the country. It is remarked as a  
40 problem of national interest that perpetuates overtime.  
41

#### 42 Additional sources

43 Chapters 6.7 to 6.10 of the WOA (World Organisation for Animal Health) Terrestrial Animal Health Code,  
44 which range from the harmonization of national AMR surveillance programmes to methodologies for  
45 monitoring the quantities of antimicrobials used and their patterns of use, the criteria for their prudent and  
46 responsible use, and the methodology for applying risk analysis derived from the use of antimicrobials in  
47 animals throughout the food chain.  
48

49 For more details on distribution and marketing of drugs in Argentina, see  
50 [https://uk.practicallaw.thomsonreuters.com/w-014-  
51 7135?transitionType=Default&contextData=\(sc.Default\)&firstPage=true](https://uk.practicallaw.thomsonreuters.com/w-014-7135?transitionType=Default&contextData=(sc.Default)&firstPage=true)  
52  
53  
54  
55  
56  
57  
58  
59  
60

## II. Summary of the Argentinian National Action Plan to combat AMR

### General overview

The national action plan was elaborated and designed by the Ministry of Health in 2015 (16) in partnership with the following organisations:

- The National Administration of Laboratories and Health Institutes (ANLIS)
- National Administration of Medicines, Food and Medical Technology (ANMAT) and the REMEDIAR Program
- Ministry of Agriculture, Livestock and Fisheries:
- National Service of Agri-food Health and Quality (SENASA)
- National Institute of Agricultural Technology (INTA)
- National Universities of La Plata and the Centre of the Province of Buenos Aires
- Representation for the Americas of the World Organization for Animal Health (WOAH)
- Argentinian Society of Infectious Diseases (SADI)
- Argentinian Society of Intensive Care (SATI)

The three main objectives of the national strategy (action plan) are:

- a) To prevent the emergence and spread of resistant bacteria through the regulation and supervision of antimicrobial sales, the promotion of their responsible use, and the prevention and control of healthcare-associated infections.
- b) To strengthen AMR surveillance and antimicrobial usage policies.
- c) To promote innovation, non-antibiotic growth promoters, and diagnostic tests to identify resistant bacteria.

These three main objectives comprise 10 different tasks detailed in the figure below.

**Figure SM1.** Main tasks of the Argentinian National Action Plan against AMR and their respective subobjectives.

| Main 10 tasks to combat AMR in Argentina                                       | Specific actions/sub-objectives                                                                                                                                                                                                                      |
|--------------------------------------------------------------------------------|------------------------------------------------------------------------------------------------------------------------------------------------------------------------------------------------------------------------------------------------------|
| 1. Promote leadership for the prevention and control of AMR                    | To develop and conduct a strategy for the prevention and control of AMR with experts' participation.<br>To fund strategies' activity to enhance participation/awareness.                                                                             |
| 2. Surveillance of AMR in human and animal health                              | To develop a national surveillance network coordinated by reference laboratories for human health, animal health and agri-food production.                                                                                                           |
| 3. Monitor antimicrobial consumption                                           | To develop a system for monitoring sales, access and appropriate and adequate use of antimicrobials.                                                                                                                                                 |
| 4. Regulate and supervise antimicrobials usage and sales                       | To establish prescription sales requirements and monitor its effective compliance.<br>To regulate the number of antimicrobial units in the pharmaceutical industry.<br>To prohibit the use of antimicrobials as growth promoters in food production. |
| 5. Promote responsible use of antimicrobials                                   | To develop guidelines for diagnosis and treatment of most prevalent infections.<br>To train health professionals on the appropriate and adequate use of antimicrobials and healthcare-associated infection prevention and control measures.          |
| 6. Promote community participation                                             | To disseminate the problem AMR might cause in the population and the establishment of education programs on the adequate use of antimicrobials                                                                                                       |
| 7. Implementation of antimicrobial usage control mechanisms                    | To implement antimicrobial management programs in health services                                                                                                                                                                                    |
| 8. Strengthen healthcare-associated infections prevention and control programs | To develop a surveillance strategy for healthcare-associated infections.                                                                                                                                                                             |

|                                                                                                    |                                                                                                                                                                                     |
|----------------------------------------------------------------------------------------------------|-------------------------------------------------------------------------------------------------------------------------------------------------------------------------------------|
|                                                                                                    | To implement prevention and control programs for healthcare-associated infections in healthcare services                                                                            |
| 9. Promote antimicrobial research as well as diagnostic methods                                    | To establish the problem of AMR as a priority matter that should be financed and researched. To prioritise the evaluation of new antimicrobials and explore new diagnostic methods. |
| 10. Monitoring and evaluating the achievement of the objectives stated in the national action plan | To create a professional commission to monitor and evaluate the implementation and execution of the strategy (National Action Plan)                                                 |

#### Overview of the animal and agri-food related sections

### **AMR SURVEILLANCE IN ANIMAL AND AGRIFOOD PRODUCTION** *[ANIMAL HEALTH SECTION of the national action plan]*

#### **Current situation of the AMR surveillance in animal health and agri-food production**

Surveillance is necessary for 3 groups of bacteria which have been primarily found in cattle, pigs, and birds: a) “indicator” bacteria, b) zoonotic bacteria, and c) pathogenic bacteria. Indicator bacteria are part of the intestinal microbiota of humans, other mammals, birds, and insects, and their importance lies in their ability to acquire and spread resistance genes that can be transferred to pathogenic or zoonotic bacteria.

#### **Strategic lines of the national action plan for the surveillance of AMR in animal health and agri-food production**

- a) Development and implementation of the national AMR surveillance program in food-producing animals to determine the presence of resistance to different antimicrobials in at least 2 commensal bacteria: *Escherichia coli* and *Enterococcus spp*, and 2 zoonotic bacteria: *Campylobacter spp* and *Salmonella spp*
- b) Harmonization of AMR surveillance strategies in human and animal health
- c) Development of communication tools and timely dissemination of information

#### **Specific actions of the national action plan for surveillance of AMR in animal health and agri-food production**

- a) To isolate commensal and zoonotic bacteria from cattle, pigs and poultry intended for human consumption, and determine their susceptibility profile to different antimicrobials
- b) To compare the results with data obtained from previous studies, when possible
- c) To determine the prevalence of AMR by animal species and by geographic region
- d) To correlate antimicrobial consumption with AMR
- e) To characterize and correlate resistance mechanisms between bacteria obtained from animal and human samples
- f) To carry out studies on the presence of antimicrobials in different sources (including water, food, etc.) and the impact of their use on the environment and production systems
- g) To evaluate alternative therapies for the use of antibiotics as growth factor in intensive production
- h) To evaluate the impact of antimicrobial administration in sources on the level of resistance observed in the environmental bacterial population.

Specifically, the National Directorate of Agrochemicals, Veterinary Products and Food of SENASA will be responsible for:

- a) Carrying out an annual monitoring of the volume of sales of antibiotics, with the collaboration of professional associations
- b) Providing data from the veterinary product traceability system as soon as it is fully operational

### **REGULATION OF ANTIMICROBIAL CONSUMPTION IN ANIMAL HEALTH AND AGRIFOOD PRODUCTION** *[ANIMAL HEALTH SECTION of the national action plan]*

For more than ten years, SENASA has carried out a Program for the Control of Residuals, Contaminants and Food Hygiene of animal origin. This program seeks to detect the presence of chemical residues and contaminants in foods of animal origin that may affect the health of consumers. Among the residues under control, we find various antimicrobial agents, which can generate antimicrobial resistance when they are present in food.

1  
2  
3  
4 **Strategic lines for the regulation of the use of antimicrobials in animal health and agri-food production**

- 5 a) Development and updating of regulations on the use of antimicrobials, aimed at preserving bacterial  
6 susceptibility as a non-renewable resource  
7 b) To participate in international seminars on regulatory practices to improve animal health  
8

9 **Specific actions to regulate the use of antimicrobials in animal health and agri-food production**

- 10 a) To compile and analyse the results of the surveillance and traceability systems for veterinary products to carry  
11 out risk analyses and therefore create risk profiles  
12 b) To strengthen control protocols on the indiscriminate sales and usage of antibiotics  
13 c) To ensure that all commercialization of antibiotics be carried out by a licensed professional  
14 d) To create a forum for discussion on the use of antimicrobials with the chambers of the veterinary products  
15 industry, professional associations, universities and the Ministry of Health  
16  
17

18 **RESPONSIBLE USE OF ANTIMICROBIALS IN ANIMAL HEALTH AND AGRIFOOD**  
19 **PRODUCTION [ANIMAL HEALTH SECTION of the national action plan]**  
20  
21

22 **Objectives:**

- 23 a) To ensure the rational use of antimicrobial agents in animals, with a view to optimizing their efficacy and  
24 safety  
25 b) To comply with the ethical obligation and the economic need to keep the animals in good health  
26 c) To prevent or reduce the transfer of resistant microorganisms or resistance determinants within animal  
27 populations, their environment and between animals and humans  
28 d) To contribute to maintaining the efficacy and usefulness of antimicrobial agents used in human and  
29 veterinary medicine  
30 e) To protect consumer health by ensuring the safety of foods of animal origin in relation to residues of  
31 antimicrobial agents

32 The measures include actions at the level of all stages and actors involved in the antimicrobial usage cycle, from  
33 their registration in SENASA to their prescription, marketing and consumption. The regulations generated by  
34 SENASA in recent years, have incorporated product traceability and treatment records, which are also in line  
35 with the WOA Code.  
36

37 **Strategic lines for the responsible use of antimicrobials in animal health and agri-food production**

- 38 a) Development of knowledge, training and information for veterinary professionals on the prudent and  
39 responsible use of antibiotics, based on pharmacokinetic, pharmacodynamic and toxicological bases  
40 b) Intensification of marketing controls for antimicrobials usage and dispensing  
41 c) To regulate the use of antimicrobials based on the information obtained from the surveillance program, and  
42 the corresponding risk analysis  
43 d) To increase pharmacological knowledge about the behaviour of antibiotic considering its impact on the  
44 environment  
45 e) To control the evolution of antibiotic resistance bacteria in clinics of small animals and intensive productions  
46 f) To promote the responsible use of antimicrobials, including their correct prescription and administration by  
47 veterinarians

48 **Specific actions for the responsible use of antimicrobials in animal health and food production**

- 49 a) To prepare a good-practice guide for the prescription and use of antimicrobials and other veterinary products,  
50 and in line with international guidelines  
51 b) To organise training courses and workshops for free practice veterinarians and those who work in the  
52 marketing chain or are in charge of livestock farms and balanced feed production plants, in conjunction with  
53 universities, professional associations and technical groups of exchange of the different productive activities  
54 (pigs, poultry, cattle, etc.)  
55 c) To incorporate AMR in the curriculum of veterinary careers, in joint work with the National Council of  
56 Veterinary Sciences  
57 d) To sustain and strengthen control in all stages of the distribution process and use of antimicrobials  
58  
59  
60

1  
2  
3  
4 **PREVENTION AND CONTROL OF INFECTIONS IN ANIMAL HEALTH AND AGRIFOOD**  
5 **PRODUCTION [ANIMAL HEALTH SECTION of the national action plan]**  
6

7 There are current international standards highlighting antimicrobials usage, including the Chapters 6.7 to 6.10 of  
8 the WOAH Terrestrial Animal Health Code.  
9

10 **Strategic lines for the prevention and control of infections in animal health**

- 11 a) To develop programs for the management, prevention and control of infectious diseases associated with AMR  
12 in veterinary medicine, considering the biosafety of intensive production establishments in terms of  
13 infrastructure and adequate equipment for infection prevention and control practices  
14 b) To train technical personnel assigned to intensive animal production for the prevention and control of  
15 infectious diseases in production environments; and  
16 c) Implementation of a network of laboratories for the identification of AMR microorganisms  
17

18 **Specific actions for the prevention and control of infections in animal health**

- 19 a) To develop regulations to enhance infection prevention and control between the Ministry of Agriculture,  
20 Livestock and Fisheries, the Ministry of Health, universities and professional associations  
21 b) To carry out training courses for veterinary professionals. Courses would be delivered by the Ministry of  
22 Agriculture, Livestock and Fisheries, the Ministry of Health, professional associations and universities  
23 c) To promote biosafety, hygiene and disinfection of personnel, equipment and productive environment  
24 compliance.  
25 d) To generate new laboratories equipped with diagnosis tools to determine the levels of AMR bacteria isolated  
26 from food animals and the emergence of resistance mechanisms to critical antimicrobials in human and animal  
27 health, as well as the proper use of antimicrobials  
28 e) Develop a monitoring and evaluation program to adopt joint strategies between the veterinary and human  
29 areas  
30

31 Also, SENASA, with the cooperation of ANLIS, INTA, and veterinary schools of national universities,  
32 implemented a parallel surveillance program for AMR in food-producing animals. The main objective of the  
33 plan is to determine and monitor the prevalence of AMR among food-producing animals to avoid the emergence  
34 and dissemination and to minimise the damage to the population and animal health (20). The program was  
35 designed in partnership with the following institutions: National Directorate of Agrochemicals, Veterinary  
36 Products and Food, National Directorate of Food Safety and Quality, National Directorate of Animal Health,  
37 General Directorate of Laboratories and Technical Control, and the General Coordination of Regional  
38 Management.  
39  
40  
41  
42  
43  
44  
45  
46  
47  
48  
49  
50  
51  
52  
53  
54  
55  
56  
57  
58  
59  
60

### III. Consent form for interviewees (participants)

Please initial box

1. I confirm that I have read and understood the Participant Information Sheet for the above study.
2. I have been given the opportunity to consider the information provided, ask questions and have had these questions answered to my satisfaction.
3. I understand that my participation is voluntary and that I can ask to withdraw before or during the interview without giving a reason and without my medical care or legal rights being affected. After the interview has been conducted and/or after data analyses, data will be anonymised and it will not be possible to withdraw.
4. I understand that my anonymised data will be stored for a minimum of 5 years and may be used in future ethically approved research.
5. I consent to this interview being recorded for the purpose of transcription after which the recording will be deleted.
6. I agree to take part in this interview.

Name of person giving consent

Date

Signature

\_\_\_\_\_

\_\_\_\_\_

\_\_\_\_\_

Name of person taking consent

Date

Signature

\_\_\_\_\_

\_\_\_\_\_

\_\_\_\_\_

## IV. Participant information sheet

You are being invited to take part in an interview on:

Agricultural antimicrobial supply chains and implementation of Antimicrobial Resistance National Action Plans in Argentina and the United Kingdom

Prof Lisa Boden, Prof Dominic Moran, Dr Emma Pitchforth, Dr Stephen Mackenzie, and Alejandro Petroni at the University of Edinburgh, University of Exeter and Argentinian National Administration of Laboratories and Health Institutes are facilitating these interviews/focus groups. Before you decide to take part, it is important you understand why we are conducting this interview and what it will involve. Please take time to read the following information carefully.

### **WHAT IS THE PURPOSE OF THIS INTERVIEW?**

This interview is intended to gather information about the current communication and interfacing between policy makers, scientific experts and stakeholders in agricultural Antimicrobial resistance and National Action Plan. Our long-term goal is to build relevant expertise to be able to design robust interventions and advice to improve antimicrobial resistance and national action plan implementation outcomes in the policy.

### **WHY HAVE I BEEN INVITED TO TAKE PART?**

You are invited to participate in this study because you have been working on or exposed to agricultural antimicrobial resistance decision-making issues in policy, either in the United Kingdom or Argentina.

### **DO I HAVE TO TAKE PART?**

No – it is entirely up to you whether you choose to take part. If you do decide to take part, please keep this Information Sheet and complete the Informed Consent Form to show that you understand your rights in relation to the meeting and that you are happy to participate. You may withdraw from an interview at any time and without giving a reason.

### **WHAT WILL HAPPEN IF I DECIDE TO TAKE PART?**

You will be invited to participate in a series of interviews and/or focus groups around agricultural antimicrobial resistance, antimicrobial supply and antimicrobial national action plans and how they are perceived and incorporated into policy decision making spaces and processes. Your expertise will allow us to work over the next three years on developing a series of robust suggestions to improve the science policy interface around antimicrobial resistance in both the UK and Argentina.

### **WHAT ARE THE POSSIBLE BENEFITS OF TAKING PART?**

By participating in this discussion and sharing your experiences with us, you will be helping the research team to engage and participate with local and national policy decision-makers around integration of scientific and policy-making expertise in mitigating the risks of antimicrobial resistance.

### **ARE THERE ANY RISKS ASSOCIATED WITH TAKING PART?**

There are no significant risks associated with participation.

### **WHAT IF I WANT TO WITHDRAW FROM THE STUDY?**

Agreeing to participate in this workshop does not oblige you to remain in the project nor have any further obligation to this project. If you no longer want to be part of the project, please inform Prof Lisa Boden [lisa.boden@ed.ac.uk]. You should note that your ideas may be used in the design and implementation of subsequent projects and interventions. You are advised to contact the research team at the earliest opportunity, preferably before the workshop should you wish to withdraw from the project.

### **INTERVIEWERS AND INTERVIEW'S DETAILS**

The interview will be performed by either our main researchers (detailed in the first paragraph) or Kasim Allel, who is a research fellow at the University of Exeter. The interview will take place at a time and



1  
2  
3 platform (virtual meeting via Zoom/Microsoft teams or in-person meetings) agreed upon both parties  
4 and depending on availability. The interview has five different stages covering participant's current  
5 role, understanding antimicrobial-resistance among stakeholders, information channels and flows  
6 within stakeholders/departments, challenges in the implementation of the national action plan, and  
7 future considerations. The interview has an approximate duration of 30-60 minutes per interview.  
8

### 9 **DATA PROTECTION AND CONFIDENTIALITY**

10 Any data collected will be processed in accordance with Data Protection Law and GDPR. All  
11 information collected about you will be kept strictly confidential. Unless they are anonymised in our  
12 records, your data will be referred to by a unique participant number rather than by name. Your data  
13 will only be viewed by the researcher/research team. Data might be classified by organisation/affiliation  
14 only if participants concur. All electronic data and transcripts will be stored on a password-protected  
15 computer file within Microsoft teams' shared folders. All paper records will be held in a locked filing  
16 cabinet. Your consent information will be kept separately from your responses to minimise risks.  
17

### 18 **WHAT WILL HAPPEN WITH THE RESULTS OF THIS STUDY?**

19 The outcomes of this meeting may also be summarised in reports and presentations to the funding  
20 agency or key stakeholders. The meeting may be video and audio recorded for the purpose of  
21 transcription. Quotes or key findings will always be made anonymous in any formal outputs unless we  
22 have your prior and explicit written permission to attribute them to you by name. Information may also  
23 be kept for future research.  
24

### 25 **WHO CAN I CONTACT?**

26 If you have any further questions about the project, please contact Prof. Lisa Boden,  
27 [lisa.boden@ed.ac.uk](mailto:lisa.boden@ed.ac.uk)  
28

29 If you wish to make a complaint about the project, please contact:  
30

31 Lisa Boden ([lisa.boden@ed.ac.uk](mailto:lisa.boden@ed.ac.uk)). In your communication, please provide the study title and detail  
32 the nature of your complaint.  
33

34 For general information about how we use your data go to:  
35

36 <https://www.ed.ac.uk/records-management/privacy-notice-research>  
37  
38  
39  
40  
41  
42  
43  
44  
45  
46  
47  
48  
49  
50  
51  
52  
53  
54  
55  
56  
57  
58  
59  
60

## V. Participant interview topic guide

You are being invited to take part in an interview on:

Agricultural antimicrobial supply chains and implementation of Antimicrobial Resistance National Action Plans in Argentina and the United Kingdom

[Please note this is a topic guide to support the semi-structured interviews. We do not envisage asking every question to every participant, but the questions are illustrative of what we hope to talk about]

### Introduction

Thank you for agreeing to take part in this interview.

Can I check that you have had a chance to read the study information sheet?

Do you have any questions about the study?

[if not returned prior to interview go through and complete consent form]

Are you happy for me to begin the interview and to start recording?

[turn on recorder]

Thank you.

The interview is designed to be free-flowing so please talk about anything that you feel is relevant, I have just prepared some questions structured into five broad areas.

### Interview's questionnaire

**BOX 1.** Survey's main sections: objectives and questions

**I. Participant's current role.** These questions will seek to understand what experiences our participants have and how they might be relevant to implementing the National Action Plan to combat AMR.

<1> What your job/role is, and what tasks do you and your organisation mainly perform?

<2> What are your (or department/organisation) interests and responsibilities concerning AMR?

**II. Understanding AMR among stakeholders.** This group of questions aim to understand employees' and organisations' views on AMR; its main drivers, change overtime, support venues, and priority areas within organisations to help tackle AMR.

<1> How do you feel (or what are your personal and department's concerns) about antimicrobial resistance in humans? Does that differ from antimicrobial-resistance in animals or any other source, including the environment (how)?

<2> Do you think the view about antimicrobial-resistance has changed over the years? How?

<3> What are the priority areas within your organisation to increase AMR awareness and to comply with the national action plan? Do you feel your organisation help contribute to any of the areas detailed in the national plan (how, which)?

<4> What are the cornerstones for increasing AMR awareness while complying with the national action plan within your organisation?

<5> Which cornerstones do you feel are most relevant within your department (organisation)? Why?

1  
2  
3 **III. Information channels and flow within stakeholders/departments.** These questions attempt to improve  
4 organisations decision making towards better AMR surveillance by identifying how the information is  
5 channelled within and between organisations.  
6

7 <1> how do you feel about AMR-related information and communication flow within your organisation and  
8 among all stakeholders?

9 <2> What do you think about communicational interactions, networking, and educational or getting-to-know  
10 instances between your organisation and other stakeholders and within departments of your organisation?  
11 Would you believe (and how) that the information pathways vary between specific organisation's  
12 fields/disciplines, public/private institutions, or certain other groups?

13 <3> Could you identify which organisms (organisations), and how, are involved in your organisation's decision  
14 making and strategy towards improving AMR surveillance and control?  
15

16 **IV. Challenges in the implementation of the national action plan.** These questions attempt to answer what  
17 factors or challenges might be key to increasing AMR awareness and improving AMR surveillance among food-  
18 producing animals and agriculture.  
19

20 <1> Do you feel there is any challenge that your organisation faces in complying with the AMR national action  
21 plan and helping contribute to better animal surveillance? (Political priorities, monetary and non-monetary  
22 resources, communication, etc) What are the most important and what can be done to overcome these challenges  
23 if your organisation could prioritise resources to contribute higher to AMR surveillance in animals?

24 <2> Who else do you think has a critical role in helping with AMR surveillance in animals from the pool of  
25 stakeholders?  
26

27 **V. Future and other considerations.** These questions aim to understand future steps to be taken within the  
28 industry and different key members to tackle AMR.  
29

30 <1> How organisations might be helped to enhance cross-communication and teamwork? How can we ensure  
31 organisations make progress and collaborate meeting NAP's criteria?

32 <2> Which organisations, at the national and international levels, do you think are most important to talk to and  
33 direct the efforts to address the gap in knowledge in AMR? Does the list differ for improving the NAP?

34 <3> Is there anything else important that you might want to share with us or that we are missing in the current  
35 interview?  
36  
37  
38  
39  
40  
41  
42  
43  
44  
45  
46  
47  
48  
49  
50  
51  
52  
53  
54  
55  
56  
57  
58  
59  
60

## VI. Description of main preliminary topic codes applied to the interview analyses and their respective definitions

**Table SM1. Topic codes and their definitions**

| Code                                                     | Definition                                                                                                             |
|----------------------------------------------------------|------------------------------------------------------------------------------------------------------------------------|
| Application of NAP                                       | Implementation of NAP and roles, including views on progress                                                           |
| AMR control                                              | Perceived progress and challenges, inclusive of surveillance                                                           |
| Antibiotic access, use and regulation (human and animal) | Referring to antibiotic consumption and access and prescriptions in animals and humans                                 |
| Alternatives to antibiotics                              | Discussion of alternatives to antibiotics                                                                              |
| Context of Covid                                         | Referring to acceleration of AMR, potential opportunities and good practice, ways of working                           |
| Governance                                               | Government priorities, federalisation, vertical vs horizontal, nature of institutions/groups, accountability (lack of) |
| AMR knowledge/awareness                                  | Referring to public and professional awareness – the challenge of awareness and steps taken to address                 |
| Resources                                                | Referring to human and economic/budgetary resource (lack of) available to tackle AMR                                   |
| Stakeholders                                             | Describing/listing stakeholders involved                                                                               |
| Stakeholder communication                                | Communication (lack of) between stakeholders                                                                           |
| Cultural and country context                             | Understanding of importance of cultural, country context, including personal relationships                             |
| International actors and policies                        | Mention of international actors and role in/influence on national AMR in Argentina                                     |
| Food production                                          | Reference to food production markets, differences by animal species                                                    |
| Information/data flow                                    | All references, specifically to information/data e.g. capacity/system to share data                                    |
| Regulation and compliance                                | Description of different regulation, proposed change and perceived (potential) impact                                  |
| Political context and agenda //                          | Importance of (changing) political will                                                                                |
| Vet sector                                               | Including role of vet sector, antibiotic in animals                                                                    |
| Training and learning opportunities                      | Including seminars, conferences, courses, stewardship programs, etc.                                                   |

## VII. Themes ordered from broader to greater specificity.

Figure SM2. Structure of the ordered themes

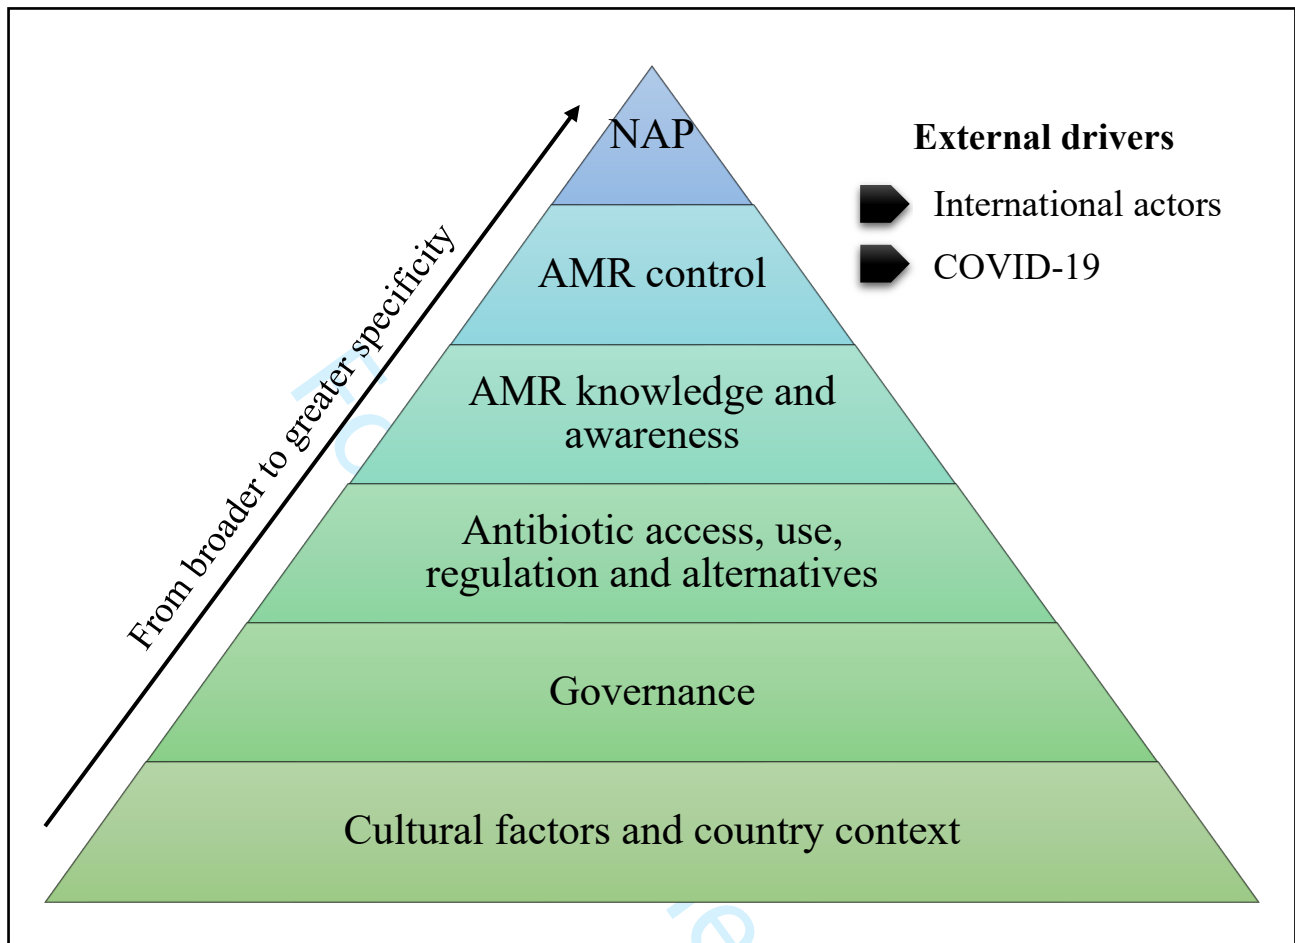

Notes: AMR= Antimicrobial resistance. NAP= National action plan.

## VIII. Packed code cloud for identified themes/sub-themes

Figure SM3. Code cloud for identified themes and sub-themes



Notes: AMR= Antimicrobial resistance.

review only

## STROBE Statement—checklist of items that should be included in reports of observational studies

|                              | Item No | Recommendation                                                                                                                                                                                                                                                                                                                                                                                                                                                         | Page No |
|------------------------------|---------|------------------------------------------------------------------------------------------------------------------------------------------------------------------------------------------------------------------------------------------------------------------------------------------------------------------------------------------------------------------------------------------------------------------------------------------------------------------------|---------|
| <b>Title and abstract</b>    | 1       | (a) Indicate the study's design with a commonly used term in the title or the abstract                                                                                                                                                                                                                                                                                                                                                                                 | 1       |
|                              |         | (b) Provide in the abstract an informative and balanced summary of what was done and what was found                                                                                                                                                                                                                                                                                                                                                                    | 1       |
| <b>Introduction</b>          |         |                                                                                                                                                                                                                                                                                                                                                                                                                                                                        |         |
| Background/rationale         | 2       | Explain the scientific background and rationale for the investigation being reported                                                                                                                                                                                                                                                                                                                                                                                   | 3       |
| Objectives                   | 3       | State specific objectives, including any prespecified hypotheses                                                                                                                                                                                                                                                                                                                                                                                                       | 3       |
| <b>Methods</b>               |         |                                                                                                                                                                                                                                                                                                                                                                                                                                                                        |         |
| Study design                 | 4       | Present key elements of study design early in the paper                                                                                                                                                                                                                                                                                                                                                                                                                | 3-4     |
| Setting                      | 5       | Describe the setting, locations, and relevant dates, including periods of recruitment, exposure, follow-up, and data collection                                                                                                                                                                                                                                                                                                                                        | 4       |
| Participants                 | 6       | (a) <i>Cohort study</i> —Give the eligibility criteria, and the sources and methods of selection of participants. Describe methods of follow-up<br><i>Case-control study</i> —Give the eligibility criteria, and the sources and methods of case ascertainment and control selection. Give the rationale for the choice of cases and controls<br><i>Cross-sectional study</i> —Give the eligibility criteria, and the sources and methods of selection of participants | 4       |
|                              |         | (b) <i>Cohort study</i> —For matched studies, give matching criteria and number of exposed and unexposed<br><i>Case-control study</i> —For matched studies, give matching criteria and the number of controls per case                                                                                                                                                                                                                                                 | n/a     |
| Variables                    | 7       | Clearly define all outcomes, exposures, predictors, potential confounders, and effect modifiers. Give diagnostic criteria, if applicable                                                                                                                                                                                                                                                                                                                               | n/a     |
| Data sources/<br>measurement | 8*      | For each variable of interest, give sources of data and details of methods of assessment (measurement). Describe comparability of assessment methods if there is more than one group                                                                                                                                                                                                                                                                                   | 4       |
| Bias                         | 9       | Describe any efforts to address potential sources of bias                                                                                                                                                                                                                                                                                                                                                                                                              | 5       |
| Study size                   | 10      | Explain how the study size was arrived at                                                                                                                                                                                                                                                                                                                                                                                                                              | 4       |
| Quantitative variables       | 11      | Explain how quantitative variables were handled in the analyses. If applicable, describe which groupings were chosen and why                                                                                                                                                                                                                                                                                                                                           | 4-5     |
| Statistical methods          | 12      | (a) Describe all statistical methods, including those used to control for confounding                                                                                                                                                                                                                                                                                                                                                                                  | 4-5     |
|                              |         | (b) Describe any methods used to examine subgroups and interactions                                                                                                                                                                                                                                                                                                                                                                                                    | 4-5     |
|                              |         | (c) Explain how missing data were addressed                                                                                                                                                                                                                                                                                                                                                                                                                            | n/a     |
|                              |         | (d) <i>Cohort study</i> —If applicable, explain how loss to follow-up was addressed<br><i>Case-control study</i> —If applicable, explain how matching of cases and controls was addressed<br><i>Cross-sectional study</i> —If applicable, describe analytical methods taking account of sampling strategy                                                                                                                                                              | n/a     |
|                              |         | (e) Describe any sensitivity analyses                                                                                                                                                                                                                                                                                                                                                                                                                                  |         |

Continued on next page

| <b>Results</b>           |     |                                                                                                                                                                                                              |                       |
|--------------------------|-----|--------------------------------------------------------------------------------------------------------------------------------------------------------------------------------------------------------------|-----------------------|
| Participants             | 13* | (a) Report numbers of individuals at each stage of study—eg numbers potentially eligible, examined for eligibility, confirmed eligible, included in the study, completing follow-up, and analysed            | 5-6                   |
|                          |     | (b) Give reasons for non-participation at each stage                                                                                                                                                         | 5                     |
|                          |     | (c) Consider use of a flow diagram                                                                                                                                                                           | Figure 1, page 5-6    |
| Descriptive data         | 14* | (a) Give characteristics of study participants (eg demographic, clinical, social) and information on exposures and potential confounders                                                                     | 5-14                  |
|                          |     | (b) Indicate number of participants with missing data for each variable of interest                                                                                                                          | 5                     |
|                          |     | (c) <i>Cohort study</i> —Summarise follow-up time (eg, average and total amount)                                                                                                                             | n/a                   |
| Outcome data             | 15* | <i>Cohort study</i> —Report numbers of outcome events or summary measures over time                                                                                                                          | n/a                   |
|                          |     | <i>Case-control study</i> —Report numbers in each exposure category, or summary measures of exposure                                                                                                         | n/a                   |
|                          |     | <i>Cross-sectional study</i> —Report numbers of outcome events or summary measures                                                                                                                           | 5-13                  |
| Main results             | 16  | (a) Give unadjusted estimates and, if applicable, confounder-adjusted estimates and their precision (eg, 95% confidence interval). Make clear which confounders were adjusted for and why they were included | n/a qualitative study |
|                          |     | (b) Report category boundaries when continuous variables were categorized                                                                                                                                    | n/a qualitative study |
|                          |     | (c) If relevant, consider translating estimates of relative risk into absolute risk for a meaningful time period                                                                                             | n/a qualitative study |
| Other analyses           | 17  | Report other analyses done—eg analyses of subgroups and interactions, and sensitivity analyses                                                                                                               | 5-13                  |
| <b>Discussion</b>        |     |                                                                                                                                                                                                              |                       |
| Key results              | 18  | Summarise key results with reference to study objectives                                                                                                                                                     | 14-15                 |
| Limitations              | 19  | Discuss limitations of the study, taking into account sources of potential bias or imprecision. Discuss both direction and magnitude of any potential bias                                                   | 16                    |
| Interpretation           | 20  | Give a cautious overall interpretation of results considering objectives, limitations, multiplicity of analyses, results from similar studies, and other relevant evidence                                   | 16                    |
| Generalisability         | 21  | Discuss the generalisability (external validity) of the study results                                                                                                                                        | 16                    |
| <b>Other information</b> |     |                                                                                                                                                                                                              |                       |
| Funding                  | 22  | Give the source of funding and the role of the funders for the present study and, if applicable, for the original study on which the present article is based                                                | 16-17                 |

\*Give information separately for cases and controls in case-control studies and, if applicable, for exposed and unexposed groups in cohort and cross-sectional studies.

**Note:** An Explanation and Elaboration article discusses each checklist item and gives methodological background and published examples of transparent reporting. The STROBE checklist is best used in conjunction with this article (freely



1  
2 available on the Web sites of PLoS Medicine at <http://www.plosmedicine.org/>, Annals of Internal Medicine at  
3 <http://www.annals.org/>, and Epidemiology at <http://www.epidem.com/>). Information on the STROBE Initiative is  
4 available at [www.strobe-statement.org](http://www.strobe-statement.org).  
5  
6  
7  
8  
9  
10  
11  
12  
13  
14  
15  
16  
17  
18  
19  
20  
21  
22  
23  
24  
25  
26  
27  
28  
29  
30  
31  
32  
33  
34  
35  
36  
37  
38  
39  
40  
41  
42  
43  
44  
45  
46  
47  
48  
49  
50  
51  
52  
53  
54  
55  
56  
57  
58  
59  
60

For peer review only
